# Supplementary material for: New phenol and chromone derivatives from the endolichenic fungus Daldinia species and their antiviral activities
Source: PubMed Central journal article supplement — RSC Adv. 2021 Jun 29;11(36):22489–94. doi: 10.1039/d1ra03754d (PMC9034232; doi:10.1039/d1ra03754d), 2021-06-29
Supplement: RA-011-D1RA03754D-s001.pdf [file RA-011-D1RA03754D-s001.pdf]

## Supplementary information

### **New Phenol and Chromone Derivatives from the Endolichenic Fungus *Daldinia* Species and Their Antiviral Activities**

Dewu Zhang,<sup>a</sup> Guowei Gu,<sup>a</sup> Bingyuan Zhang,<sup>ab</sup> Yujia Wang,<sup>a</sup> Jinglin Bai,<sup>a</sup> Yuang Fang,<sup>a</sup> Tao Zhang,<sup>a</sup> Shengjun Dai,<sup>b</sup> Shan Cen<sup>a</sup> and Liyan Yu<sup>\*a</sup>

<sup>a</sup> *Division for Medicinal Microorganisms Related Strains CAMS Collection Center of Pathogenic Microorganisms, Institute of Medicinal Biotechnology, Chinese Academy of Medical Sciences and Peking Union Medical College, Beijing 100050, P. R. China*

<sup>b</sup> *School of Pharmacy, Yantai University, Yantai 264005, P. R. China*

\*To whom correspondence should be addressed.

E-mail: yly@cpcc.ac.cn

## Contents

|                                                                                |     |
|--------------------------------------------------------------------------------|-----|
| <b>Table S1.</b> Antiviral activities of <b>1–12</b> .....                     | S4  |
| <b>Figure S1.</b> $^1\text{H}$ NMR spectrum of <b>1</b> .....                  | S5  |
| <b>Figure S2.</b> $^{13}\text{C}$ NMR spectrum of <b>1</b> .....               | S6  |
| <b>Figure S3.</b> DEPT spectrum of <b>1</b> .....                              | S7  |
| <b>Figure S4.</b> $^1\text{H}$ – $^1\text{H}$ COSY spectrum of <b>1</b> .....  | S8  |
| <b>Figure S5.</b> HSQC spectrum of <b>1</b> .....                              | S9  |
| <b>Figure S6.</b> HMBC spectrum of <b>1</b> .....                              | S10 |
| <b>Figure S7.</b> HRESIMS spectrum of <b>1</b> .....                           | S11 |
| <b>Figure S8.</b> IR spectrum of <b>1</b> .....                                | S12 |
| <b>Figure S9.</b> UV spectrum of <b>1</b> .....                                | S12 |
| <b>Figure S10.</b> $^1\text{H}$ NMR spectrum of <b>2</b> .....                 | S13 |
| <b>Figure S11.</b> $^{13}\text{C}$ NMR spectrum of <b>2</b> .....              | S14 |
| <b>Figure S12.</b> DEPT spectrum of <b>2</b> .....                             | S15 |
| <b>Figure S13.</b> $^1\text{H}$ – $^1\text{H}$ COSY spectrum of <b>2</b> ..... | S16 |
| <b>Figure S14.</b> HSQC spectrum of <b>2</b> .....                             | S17 |
| <b>Figure S15.</b> HMBC spectrum of <b>2</b> .....                             | S18 |
| <b>Figure S16.</b> HRESIMS spectrum of <b>2</b> .....                          | S19 |
| <b>Figure S17.</b> IR spectrum of <b>2</b> .....                               | S20 |
| <b>Figure S18.</b> UV spectrum of <b>2</b> .....                               | S20 |
| <b>Figure S19.</b> $^1\text{H}$ NMR spectrum of <b>3</b> .....                 | S21 |
| <b>Figure S20.</b> $^{13}\text{C}$ NMR spectrum of <b>3</b> .....              | S22 |
| <b>Figure S21.</b> DEPT spectrum of <b>3</b> .....                             | S23 |
| <b>Figure S22.</b> $^1\text{H}$ – $^1\text{H}$ COSY spectrum of <b>3</b> ..... | S24 |
| <b>Figure S23.</b> HSQC spectrum of <b>3</b> .....                             | S25 |
| <b>Figure S24.</b> HMBC spectrum of <b>3</b> .....                             | S26 |
| <b>Figure S25.</b> HRESIMS spectrum of <b>3</b> .....                          | S27 |
| <b>Figure S26.</b> IR spectrum of <b>3</b> .....                               | S28 |
| <b>Figure S27.</b> UV spectrum of <b>3</b> .....                               | S28 |
| <b>Figure S28.</b> $^1\text{H}$ NMR spectrum of <b>9</b> .....                 | S29 |
| <b>Figure S29.</b> $^{13}\text{C}$ NMR spectrum of <b>9</b> .....              | S30 |
| <b>Figure S30.</b> DEPT spectrum of <b>9</b> .....                             | S31 |
| <b>Figure S31.</b> $^1\text{H}$ – $^1\text{H}$ COSY spectrum of <b>9</b> ..... | S32 |

|                                                                                    |     |
|------------------------------------------------------------------------------------|-----|
| <b>Figure S32.</b> HSQC spectrum of <b>9</b> .....                                 | S33 |
| <b>Figure S33.</b> HMBC spectrum of <b>9</b> .....                                 | S34 |
| <b>Figure S34.</b> 1D NOE spectrum of <b>9</b> .....                               | S35 |
| <b>Figure S35.</b> HRESIMS spectrum of <b>9</b> .....                              | S36 |
| <b>Figure S36.</b> IR spectrum of <b>9</b> .....                                   | S37 |
| <b>Figure S37.</b> UV spectrum of <b>9</b> .....                                   | S37 |
| <b>Figure S38.</b> CD spectrum of <b>9</b> .....                                   | S38 |
| <b>Figure S39.</b> <sup>1</sup> H NMR spectrum of <b>10</b> .....                  | S39 |
| <b>Figure S40.</b> <sup>13</sup> C NMR spectrum of <b>10</b> .....                 | S40 |
| <b>Figure S41.</b> DEPT spectrum of <b>10</b> .....                                | S41 |
| <b>Figure S42.</b> <sup>1</sup> H- <sup>1</sup> H COSY spectrum of <b>10</b> ..... | S42 |
| <b>Figure S43.</b> HSQC spectrum of <b>10</b> .....                                | S43 |
| <b>Figure S44.</b> HMBC spectrum of <b>10</b> .....                                | S44 |
| <b>Figure S45.</b> 1D NOE spectrum of <b>10</b> .....                              | S45 |
| <b>Figure S46.</b> HRESIMS spectrum of <b>10</b> .....                             | S46 |
| <b>Figure S47.</b> IR spectrum of <b>10</b> .....                                  | S47 |
| <b>Figure S48.</b> UV spectrum of <b>10</b> .....                                  | S47 |
| <b>Figure S49.</b> CD spectrum of <b>10</b> .....                                  | S48 |

**Table S1** Antiviral activities of **1–12**.

| compound  | inhibition rate (%) in 10 $\mu$ M |                  |
|-----------|-----------------------------------|------------------|
|           | IAV                               | ZIKV             |
| <b>1</b>  | 39.46 $\pm$ 6.33                  | 19.6 $\pm$ 7.04  |
| <b>2</b>  | 0                                 | 0                |
| <b>3</b>  | 58.13 $\pm$ 1.12                  | 0                |
| <b>4</b>  | 40.95 $\pm$ 2.68                  | 17.10 $\pm$ 3.88 |
| <b>5</b>  | 10.03 $\pm$ 0.99                  | 0                |
| <b>6</b>  | 0                                 | 30.61 $\pm$ 2.74 |
| <b>7</b>  | 6.77 $\pm$ 1.72                   | 28.66 $\pm$ 1.28 |
| <b>8</b>  | 0                                 | 42.70 $\pm$ 0.81 |
| <b>9</b>  | 35.72 $\pm$ 2.20                  | 28.33 $\pm$ 3.96 |
| <b>10</b> | 0                                 | 14.48 $\pm$ 1.80 |
| <b>11</b> | 43.08 $\pm$ 4.94                  | 17.31 $\pm$ 1.12 |
| <b>12</b> | 18.75 $\pm$ 0.90                  | 12.23 $\pm$ 8.98 |
| Ribavirin | 97.38 $\pm$ 0.56 (50 $\mu$ M)     | 37.08 $\pm$ 8.76 |

Figure S1. <sup>1</sup>H NMR spectrum of **1**

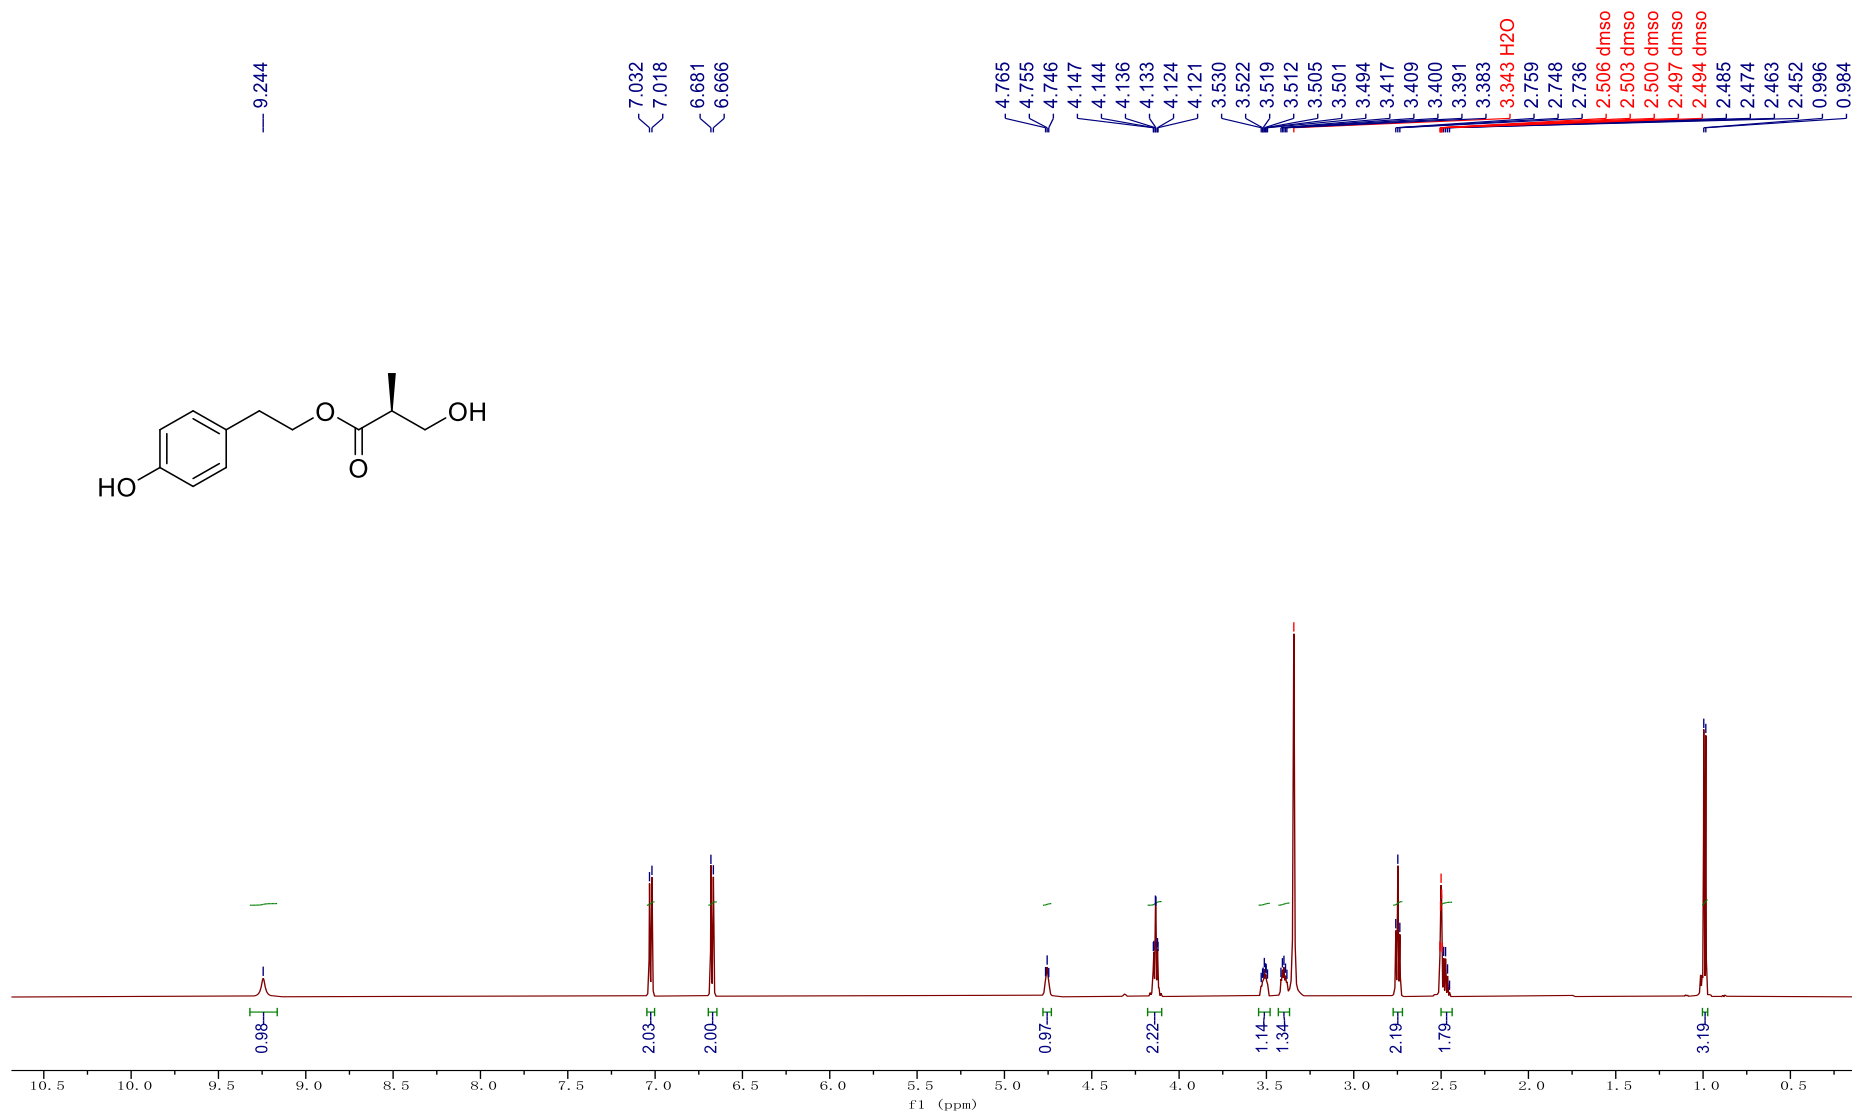

Figure S2.  $^{13}\text{C}$  NMR spectrum of **1**

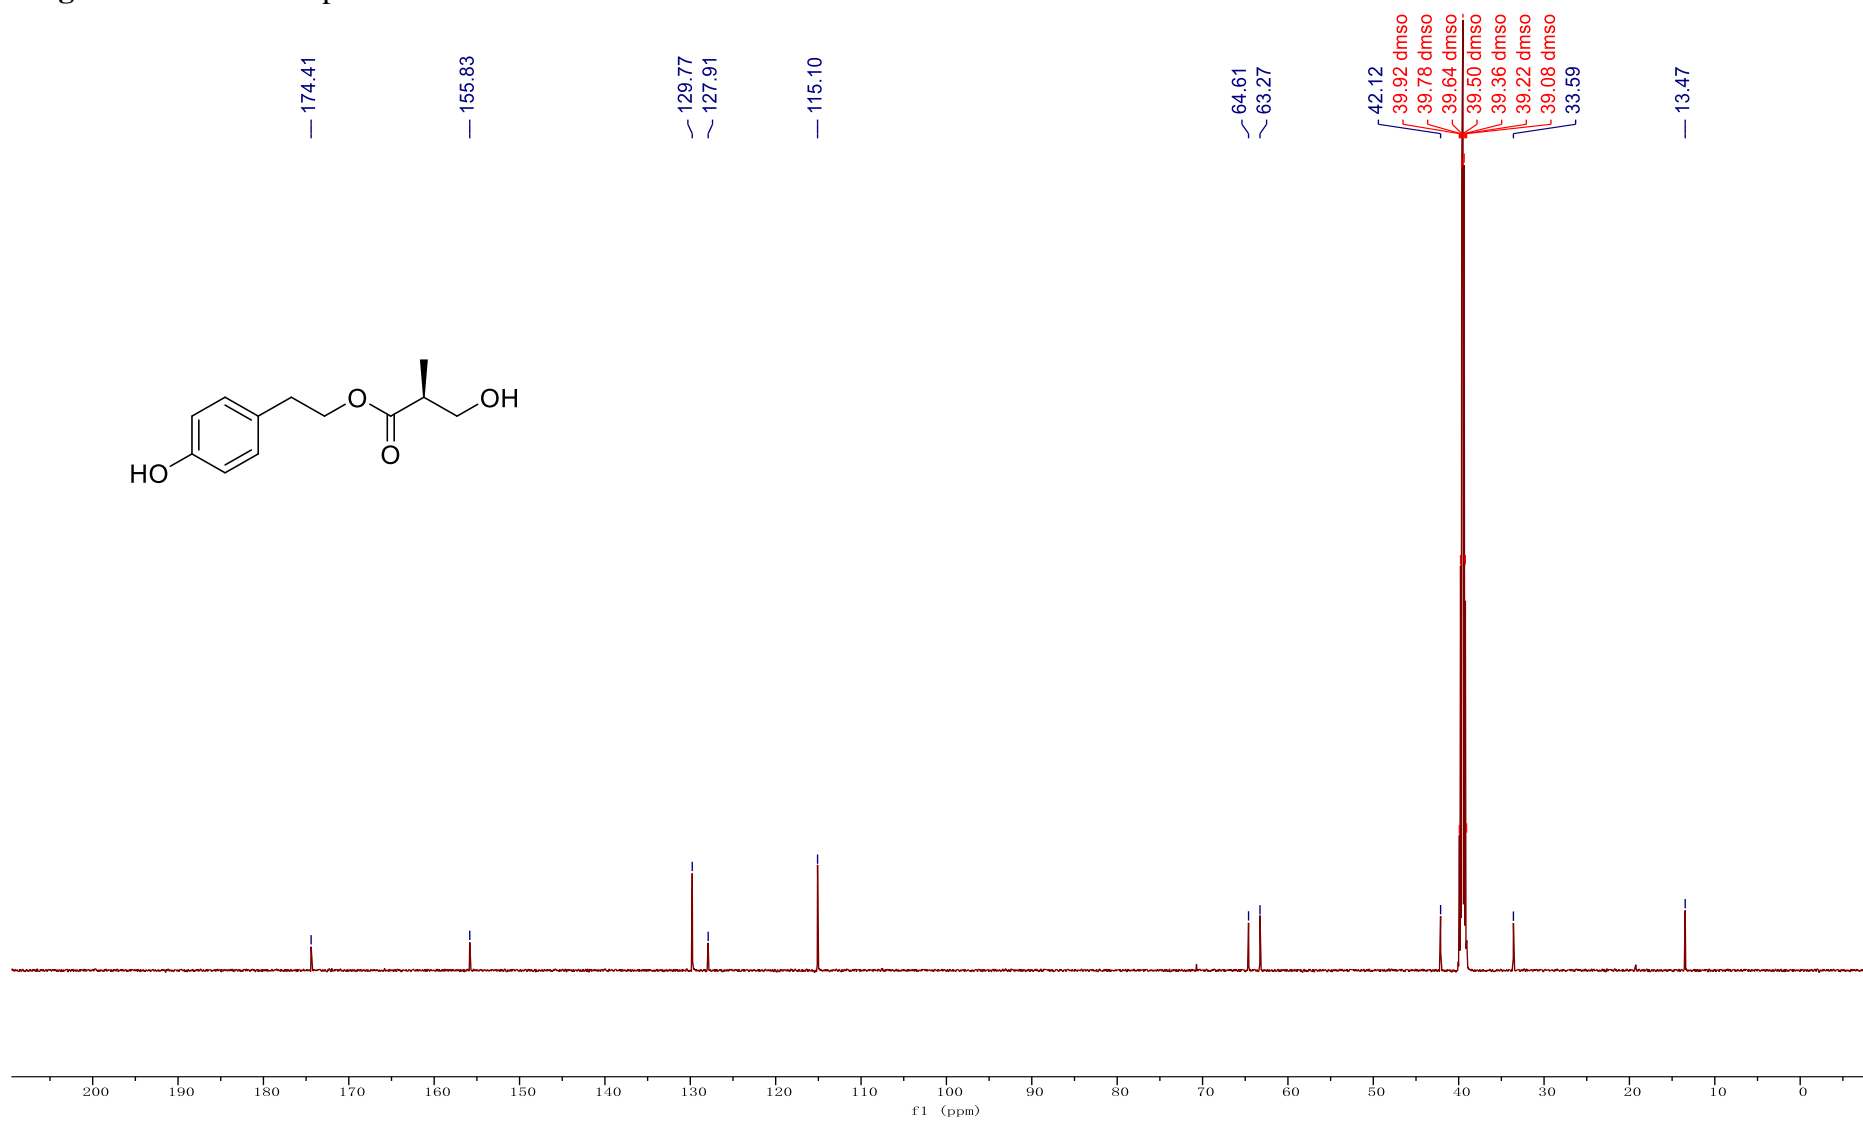

**Figure S3.** DEPT spectrum of **1**

DEPT\_01  
VNS-600 DEPT 770-35-5-2 IN dms0 Nov 3 2020  
2

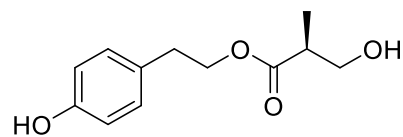

DEPT\_01  
VNS-600 DEPT 770-35-5-2 IN dms0 Nov 3 2020  
1

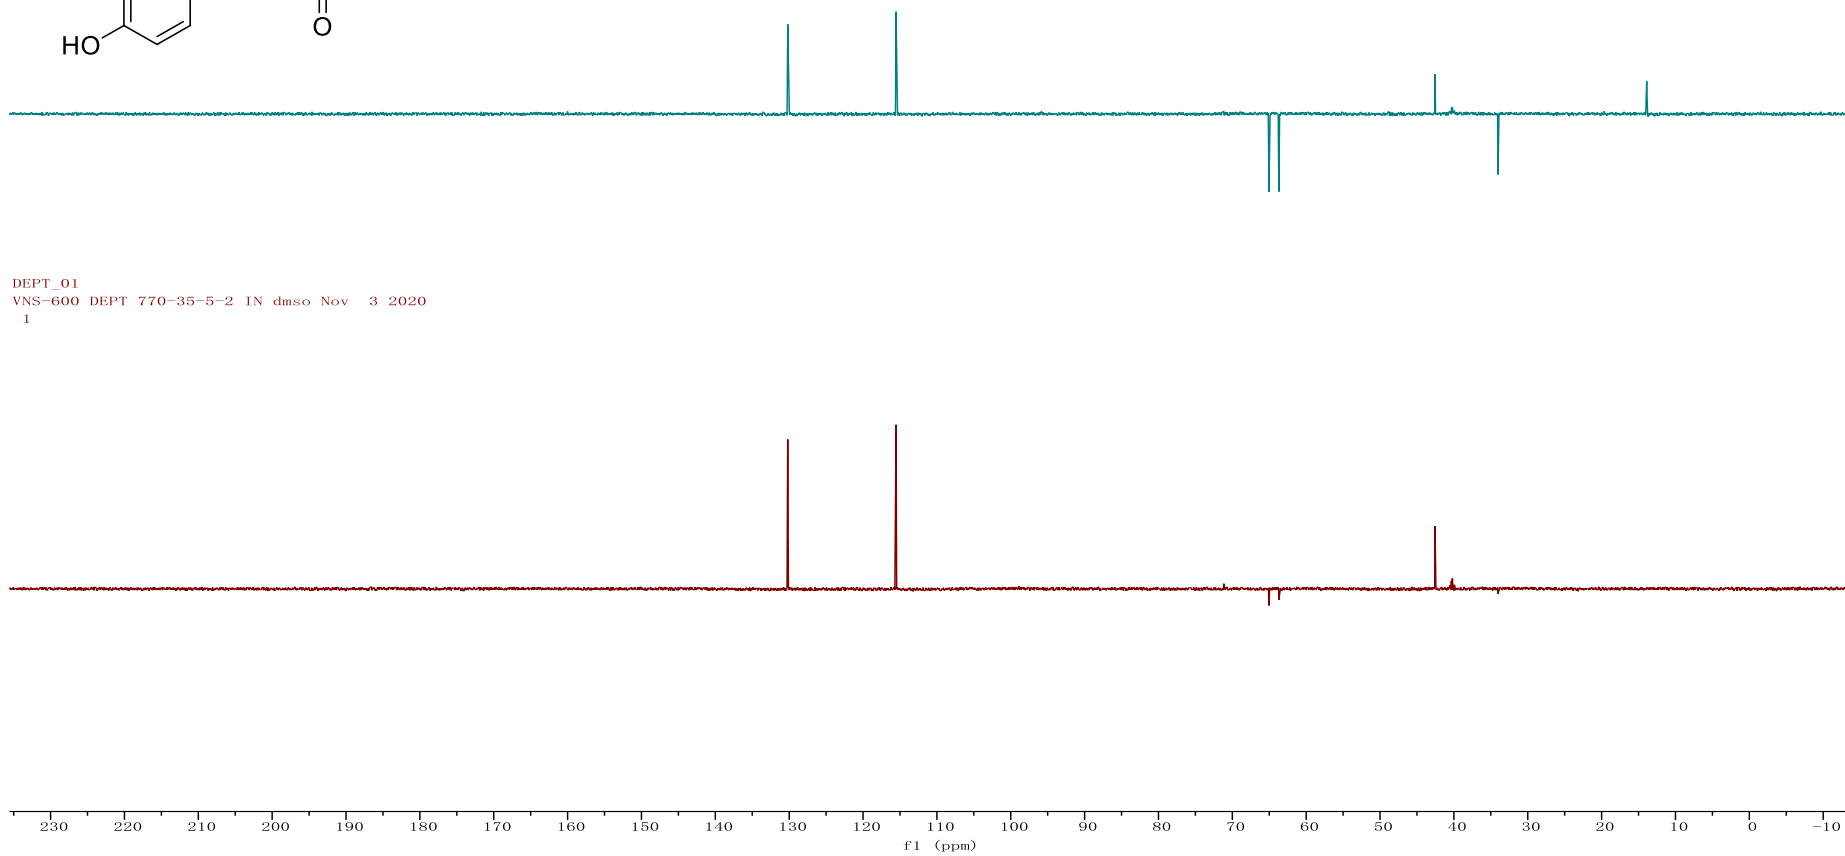

**Figure S4.**  $^1\text{H}$ - $^1\text{H}$  COSY spectrum of **1**

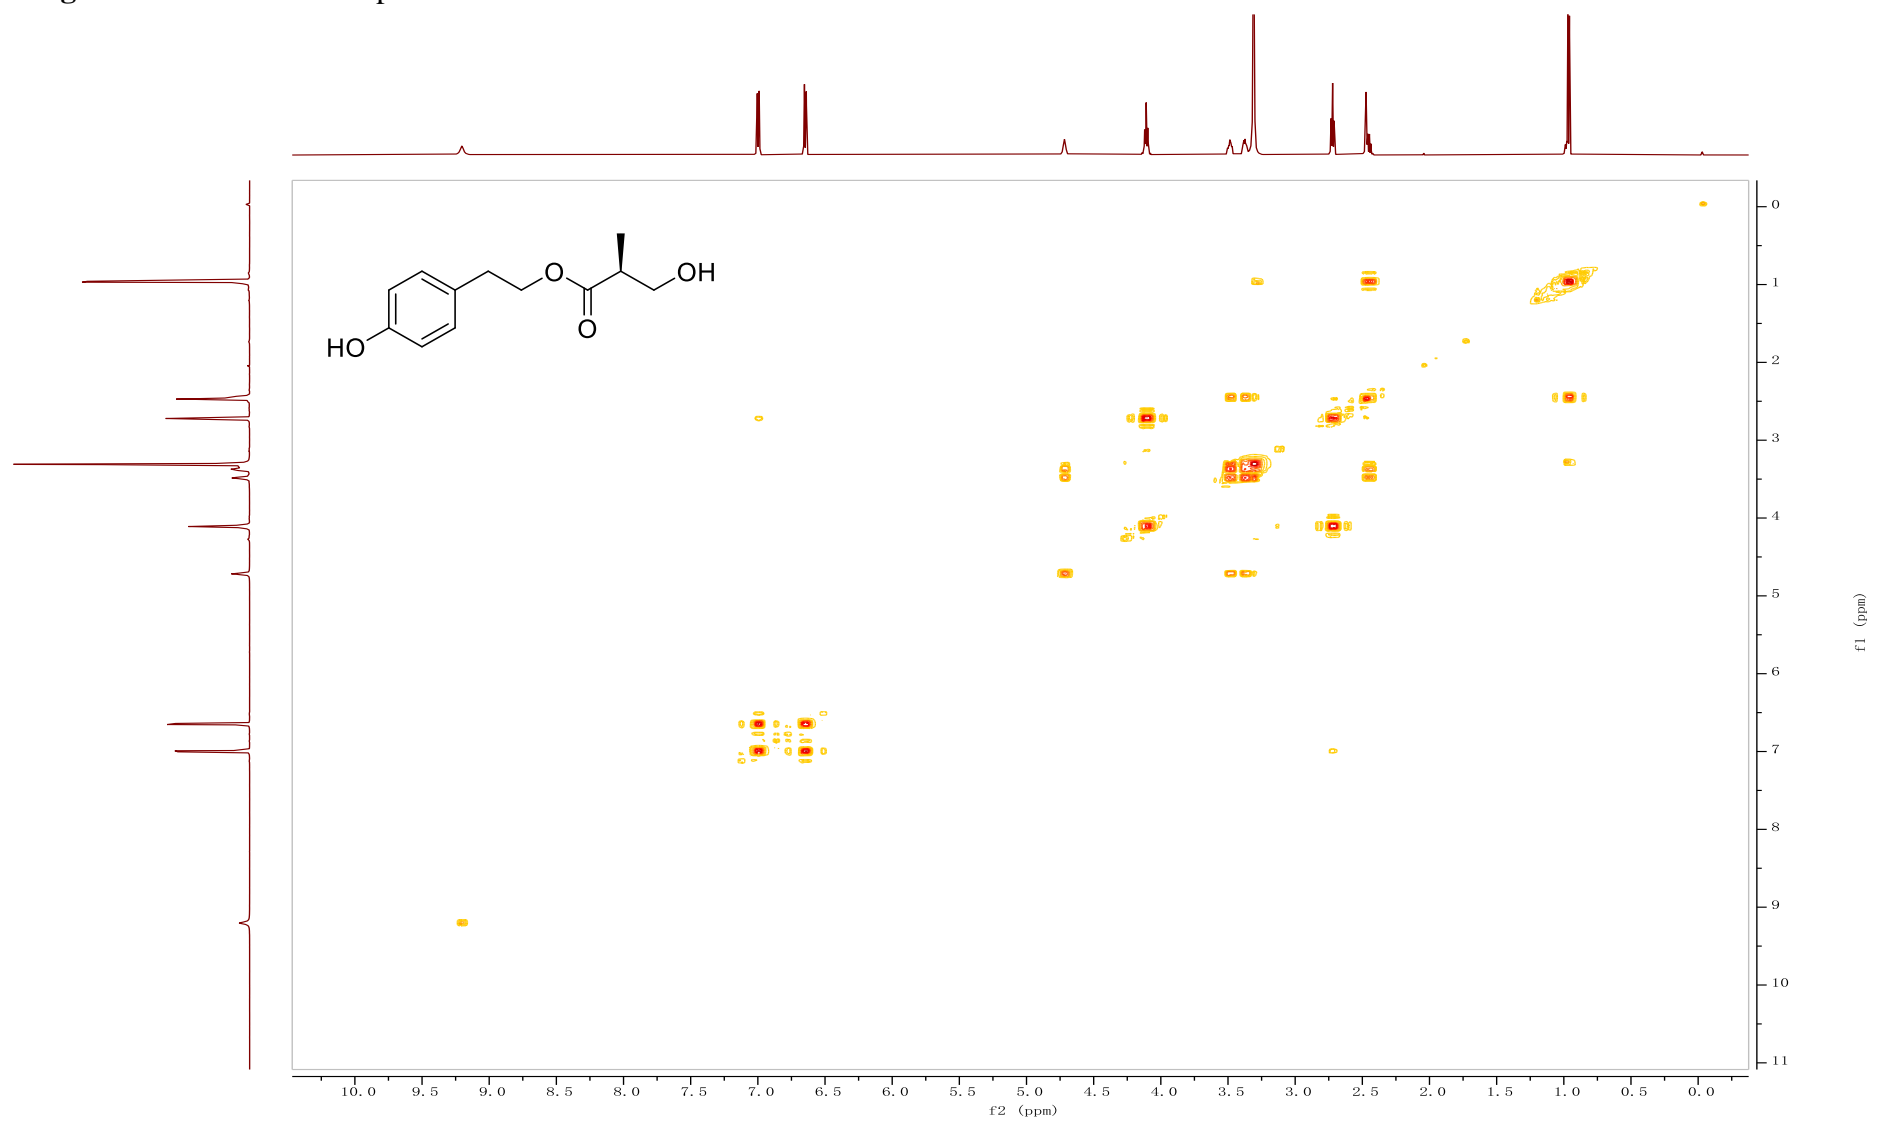



Figure S5. HSQC spectrum of **1**

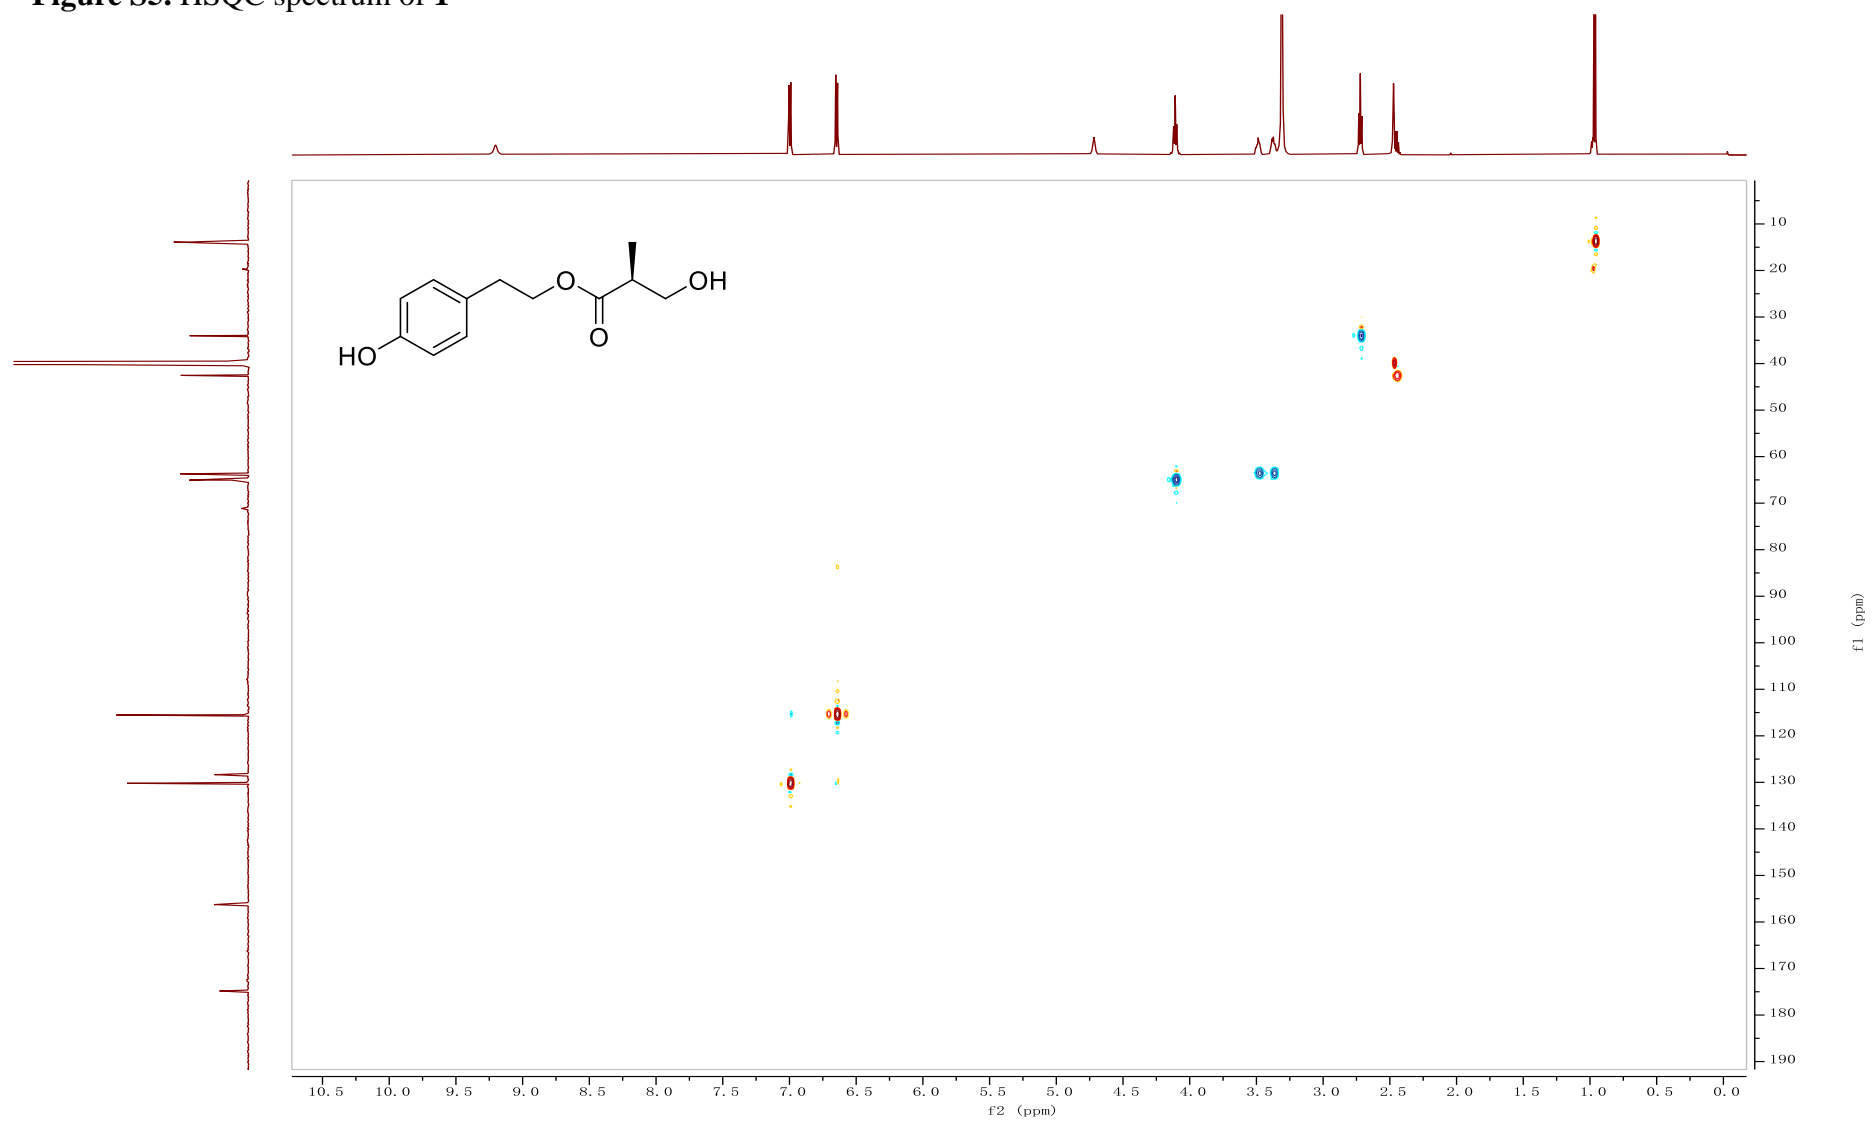

**Figure S6.** HMBC spectrum of **1**

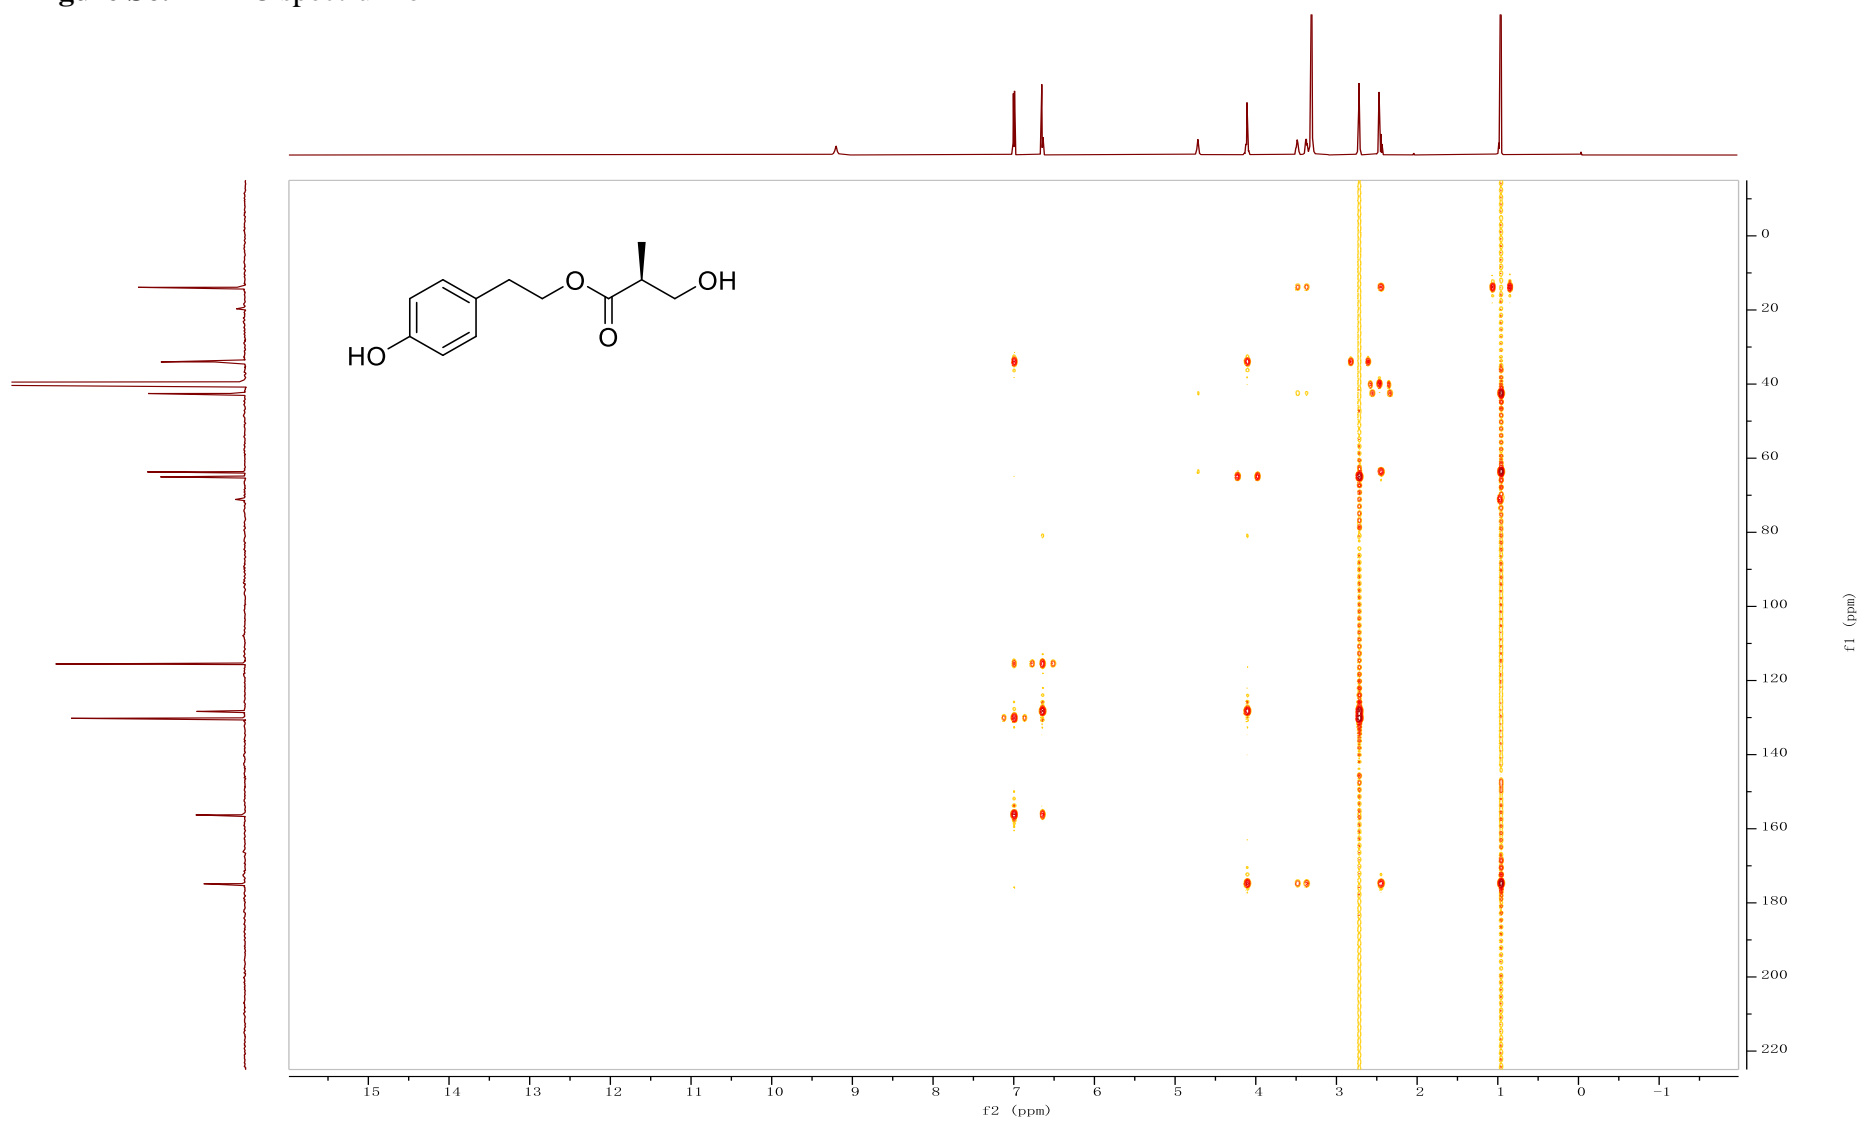

**Figure S7.** HRESIMS spectrum of **1**

/70-35-5-2 #61 RI: 0.48 AV: 1 NL: 5.55E/  
T: FTMS + c ESI Full ms [50.00-700.00]

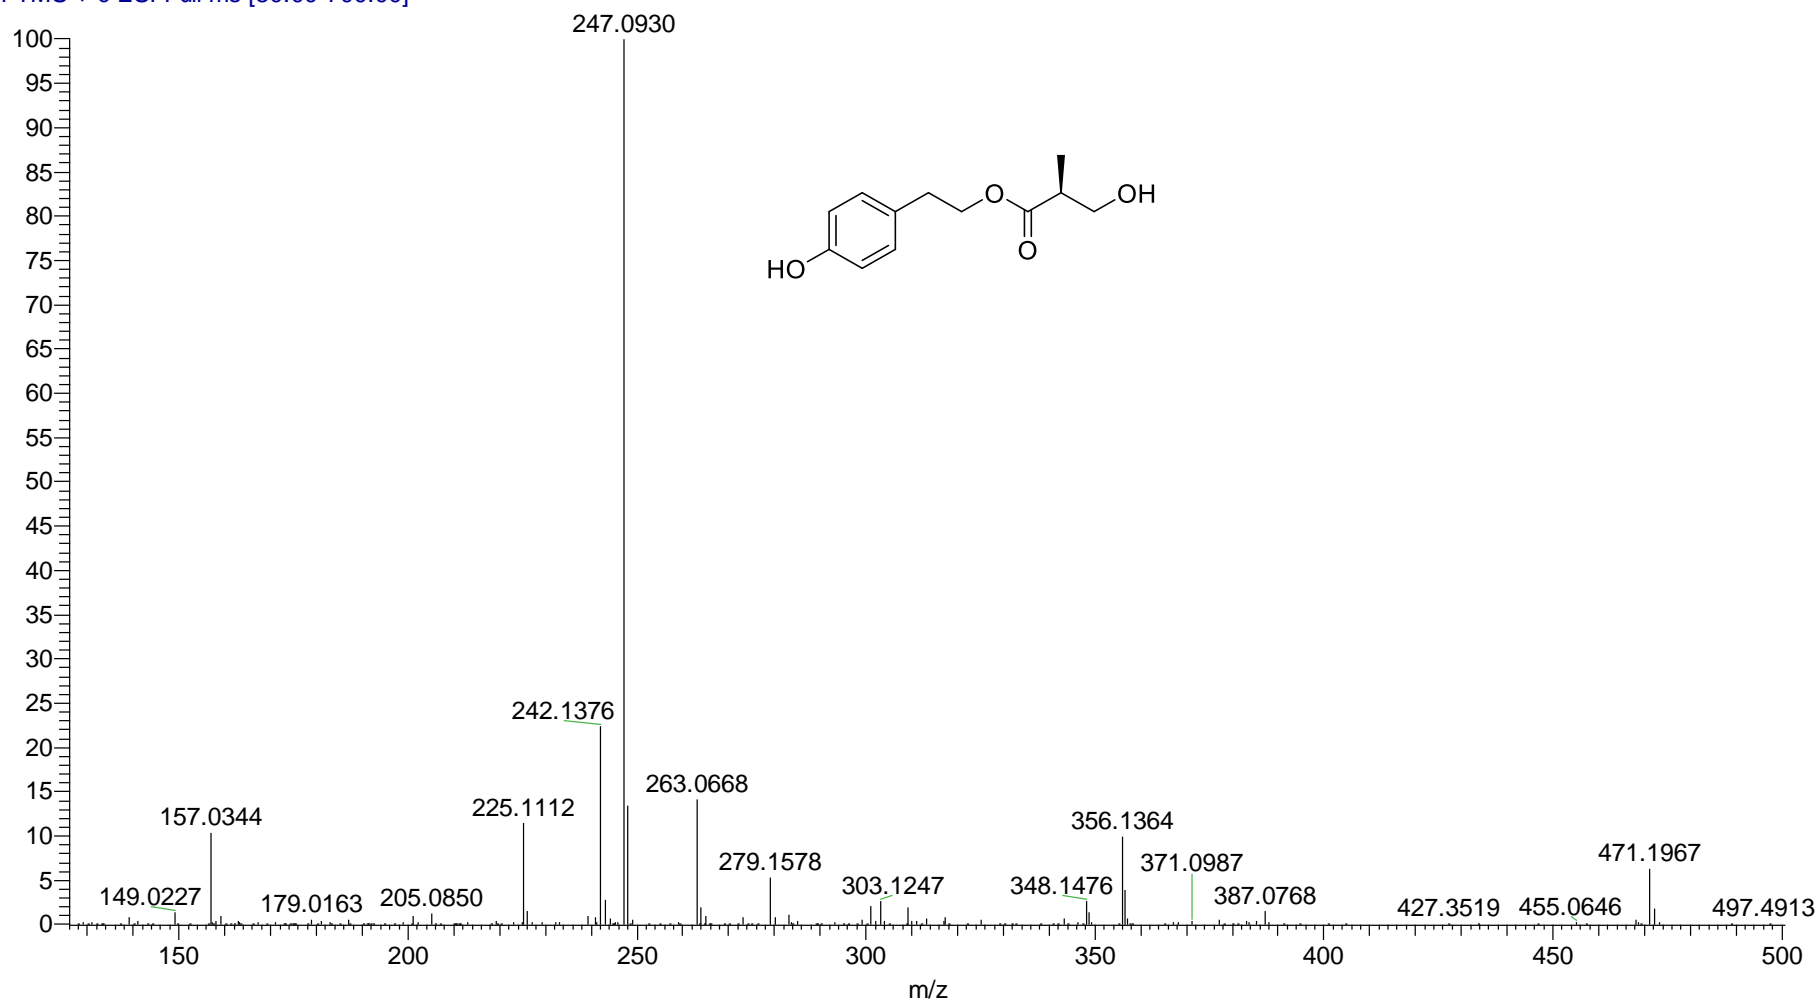

**Figure S8.** IR spectrum of **1**

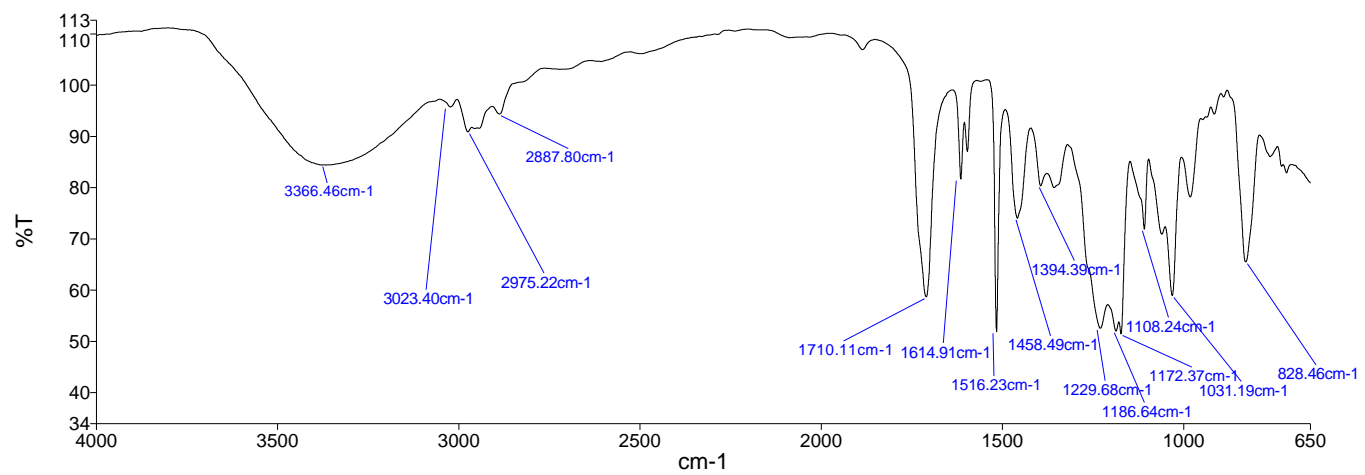

**Figure S9.** UV spectrum of **1**

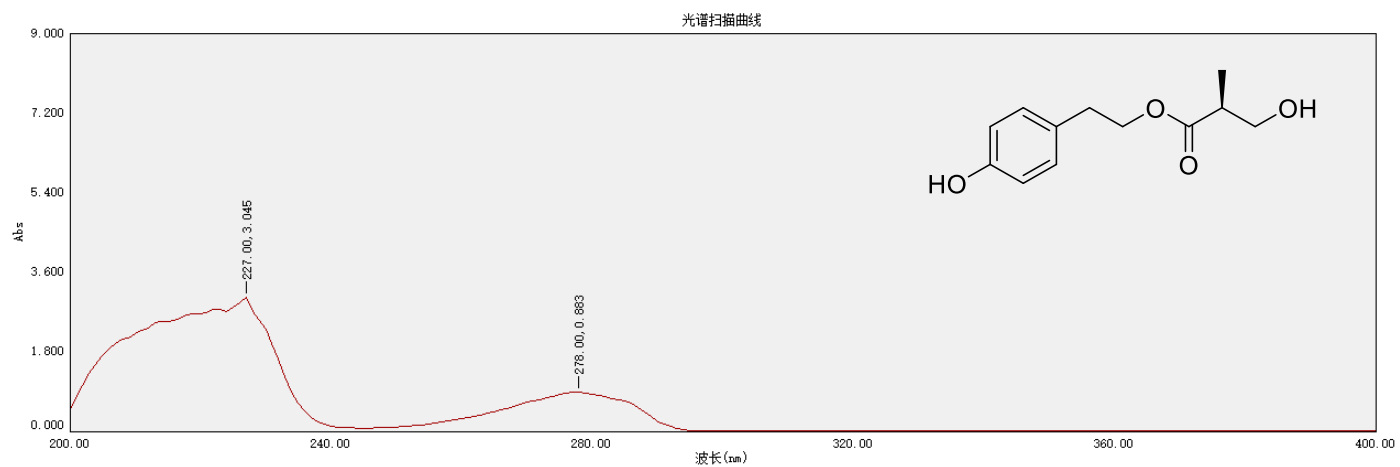

Figure S10. <sup>1</sup>H NMR spectrum of 2

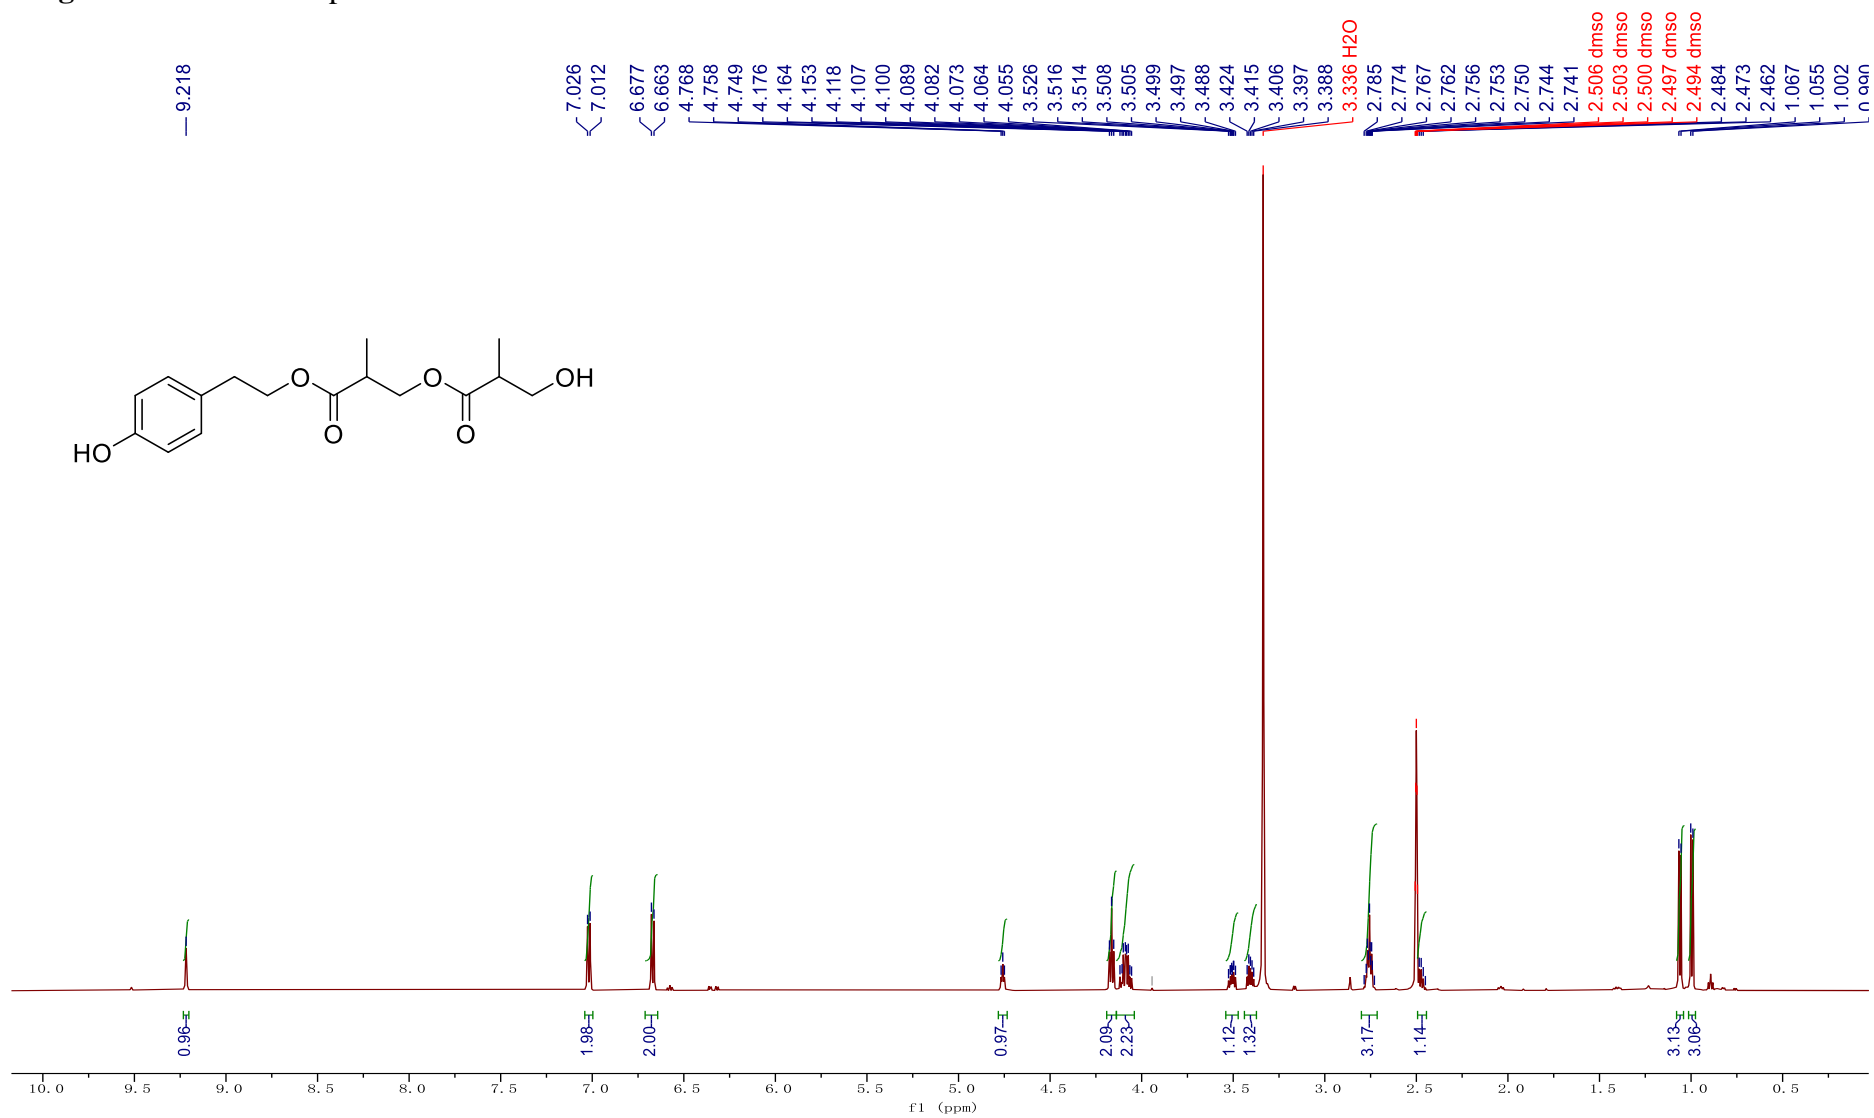

Figure S11. <sup>13</sup>C NMR spectrum of 2

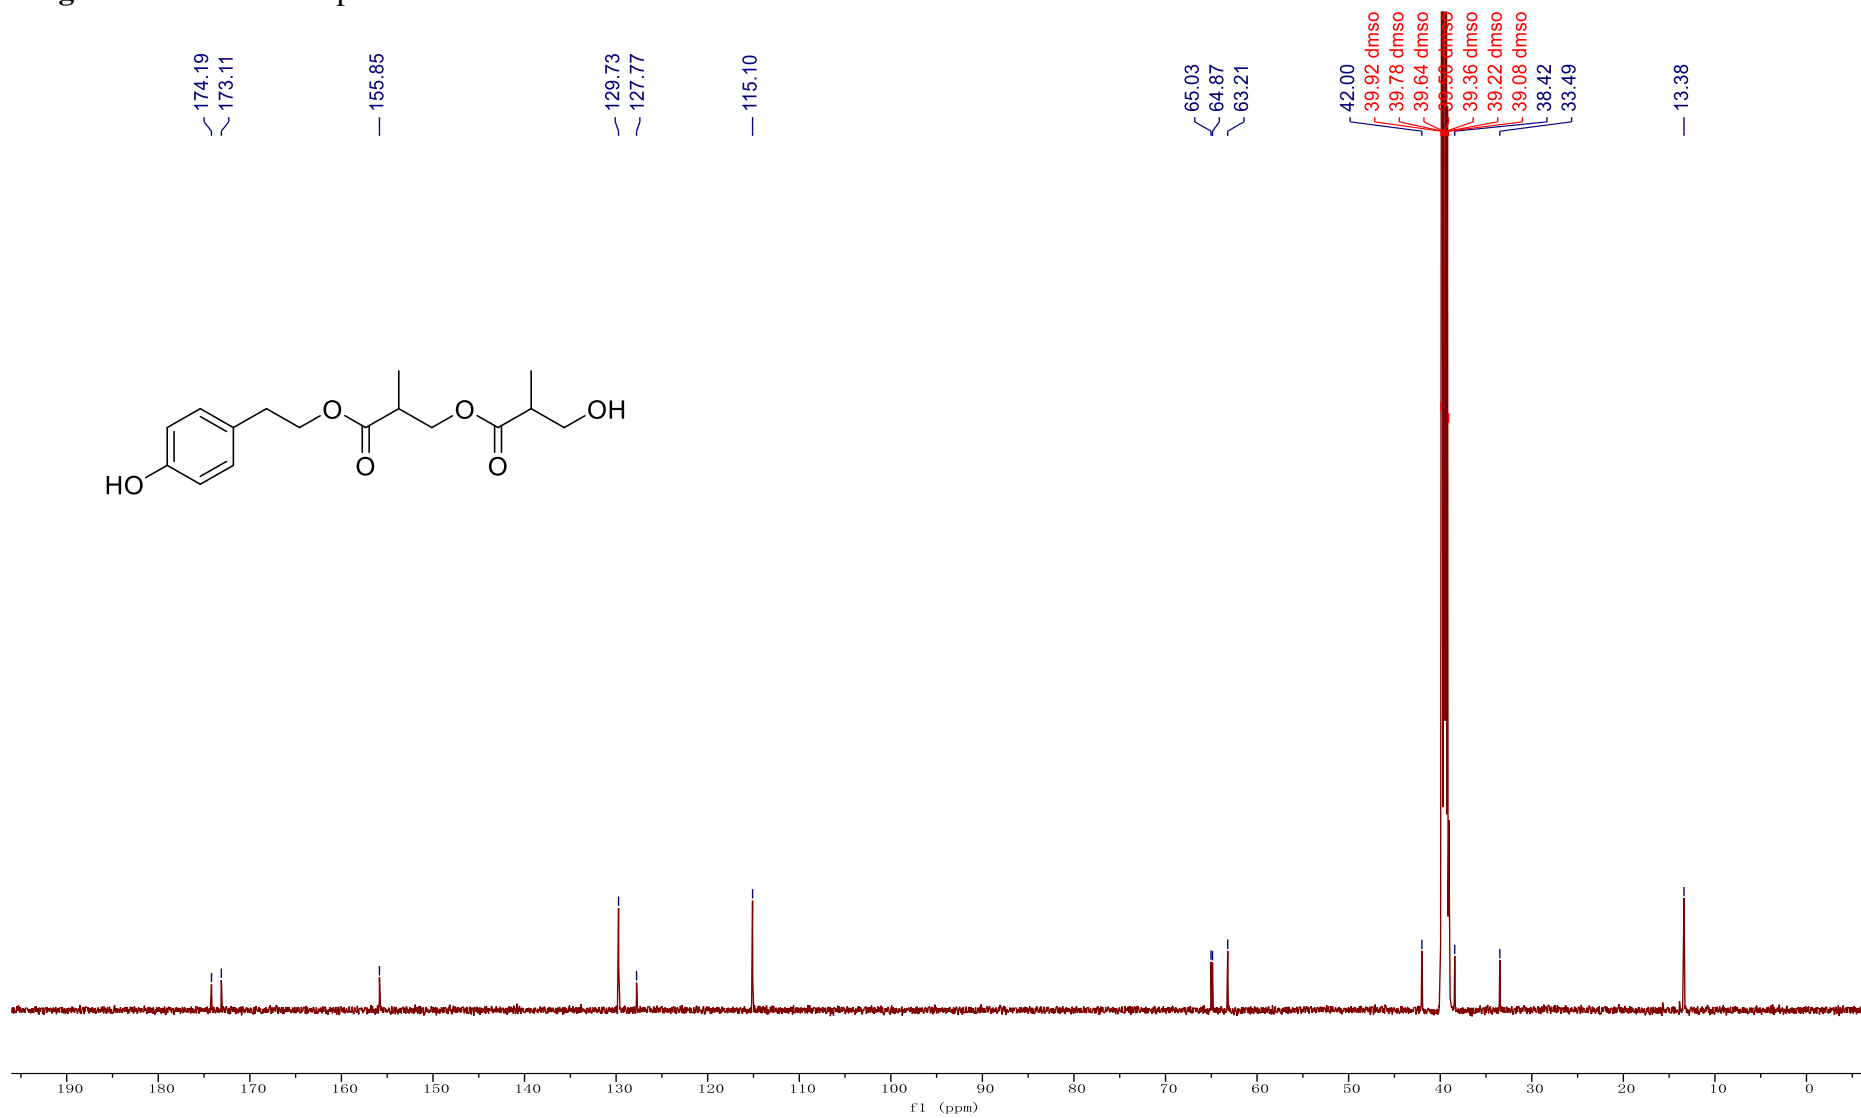

**Figure S12.** DEPT spectrum of **2**

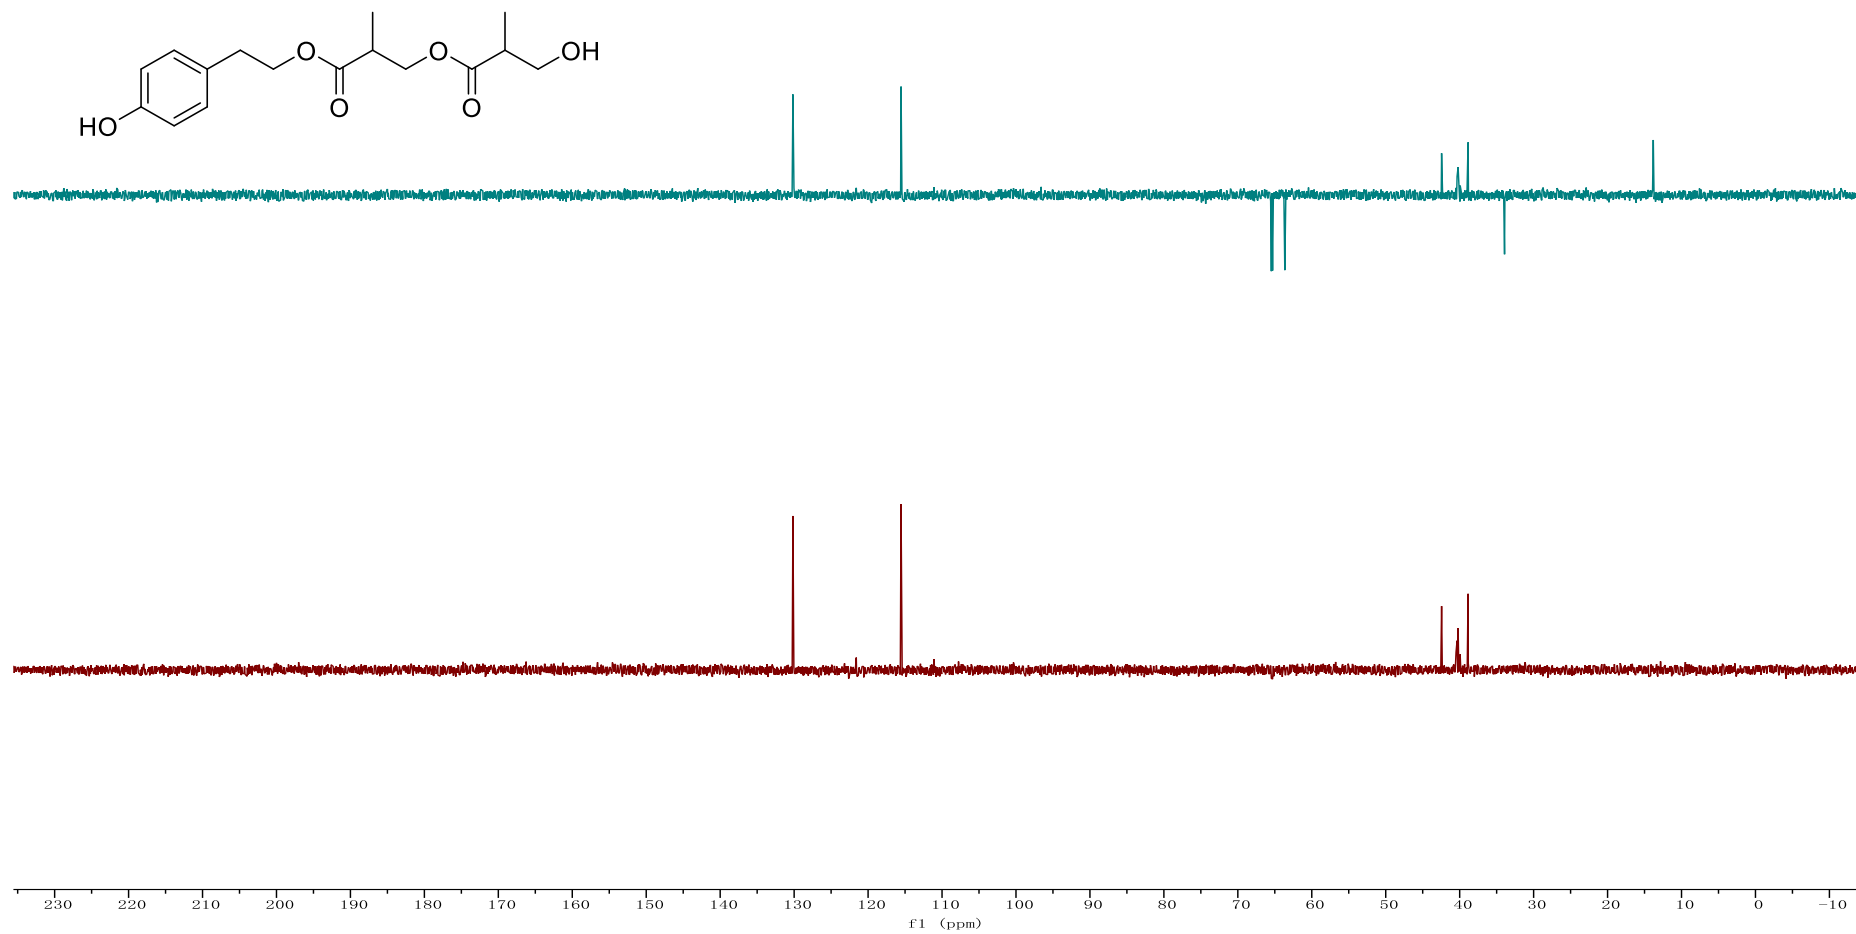

**Figure S13.**  $^1\text{H}$ - $^1\text{H}$  COSY spectrum of **2**

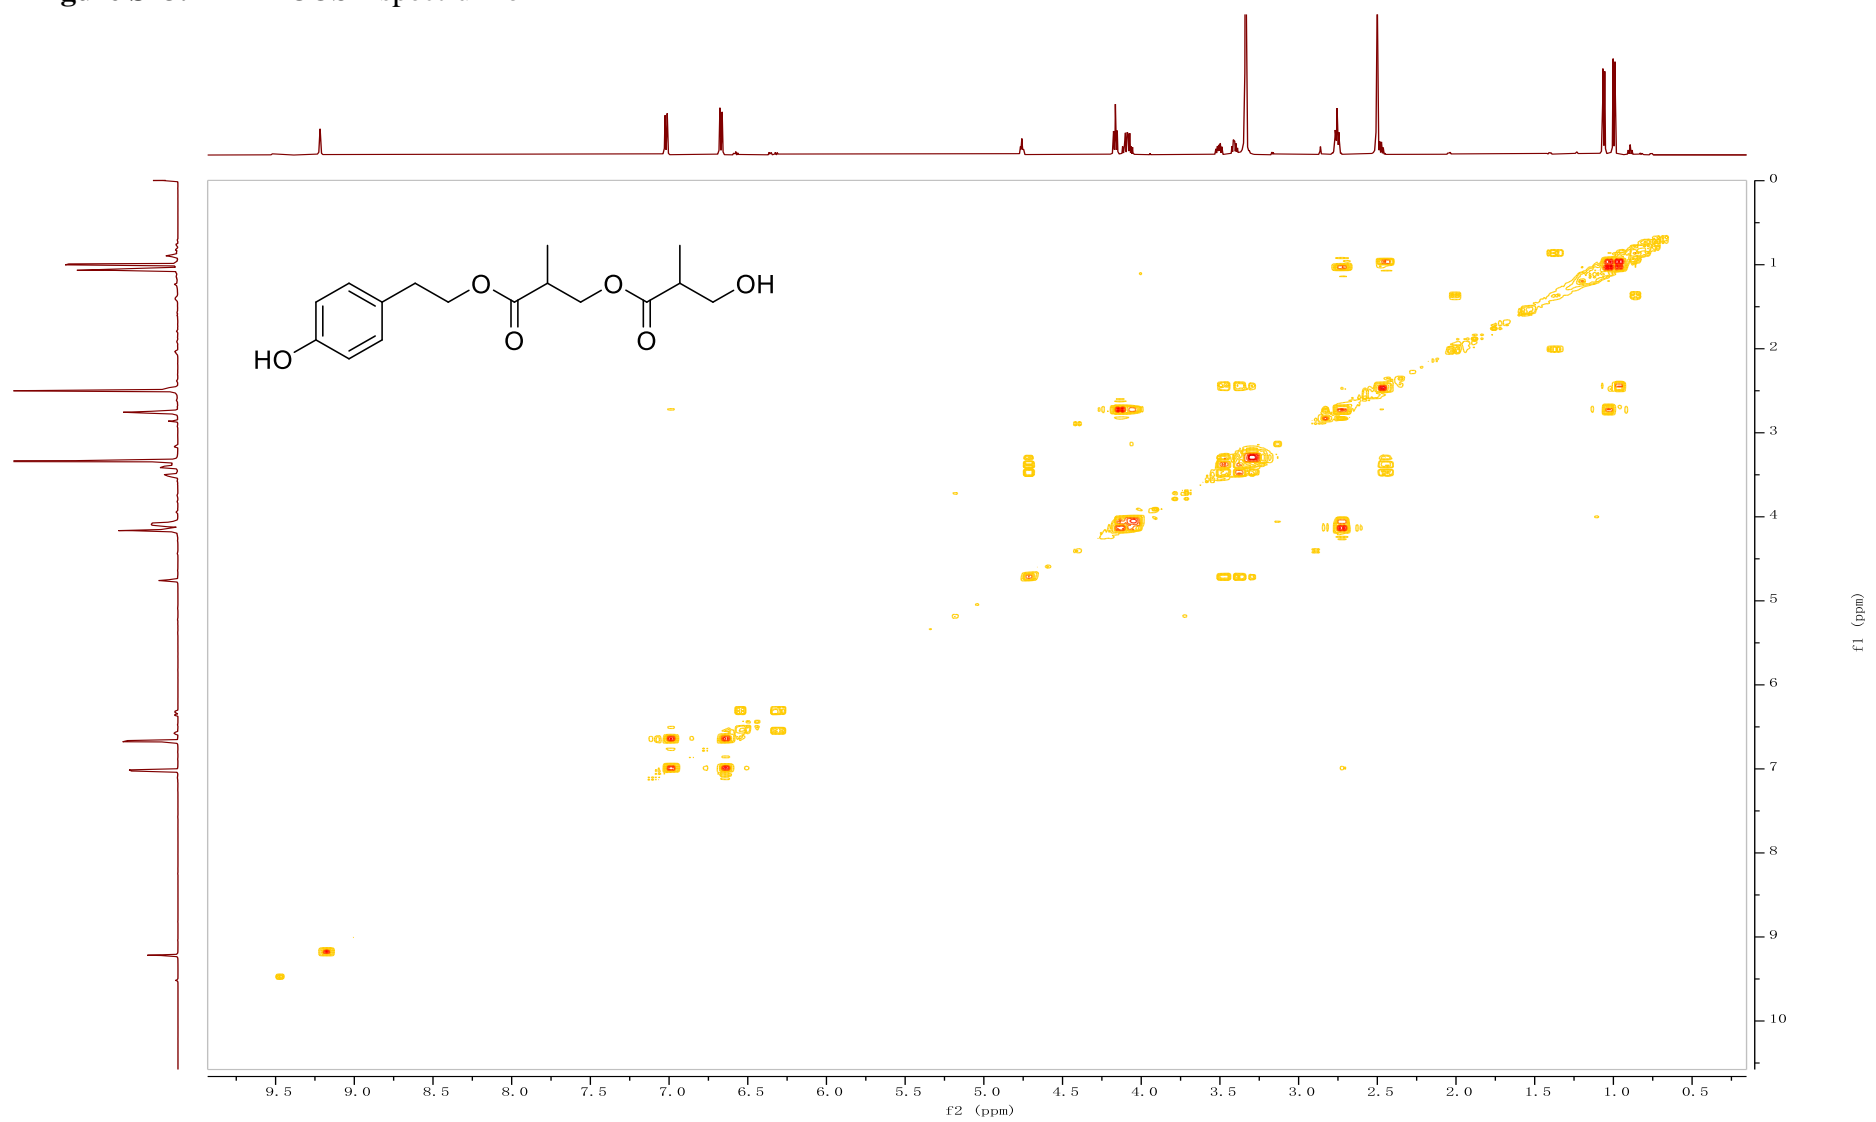



Figure S14. HSQC spectrum of **2**

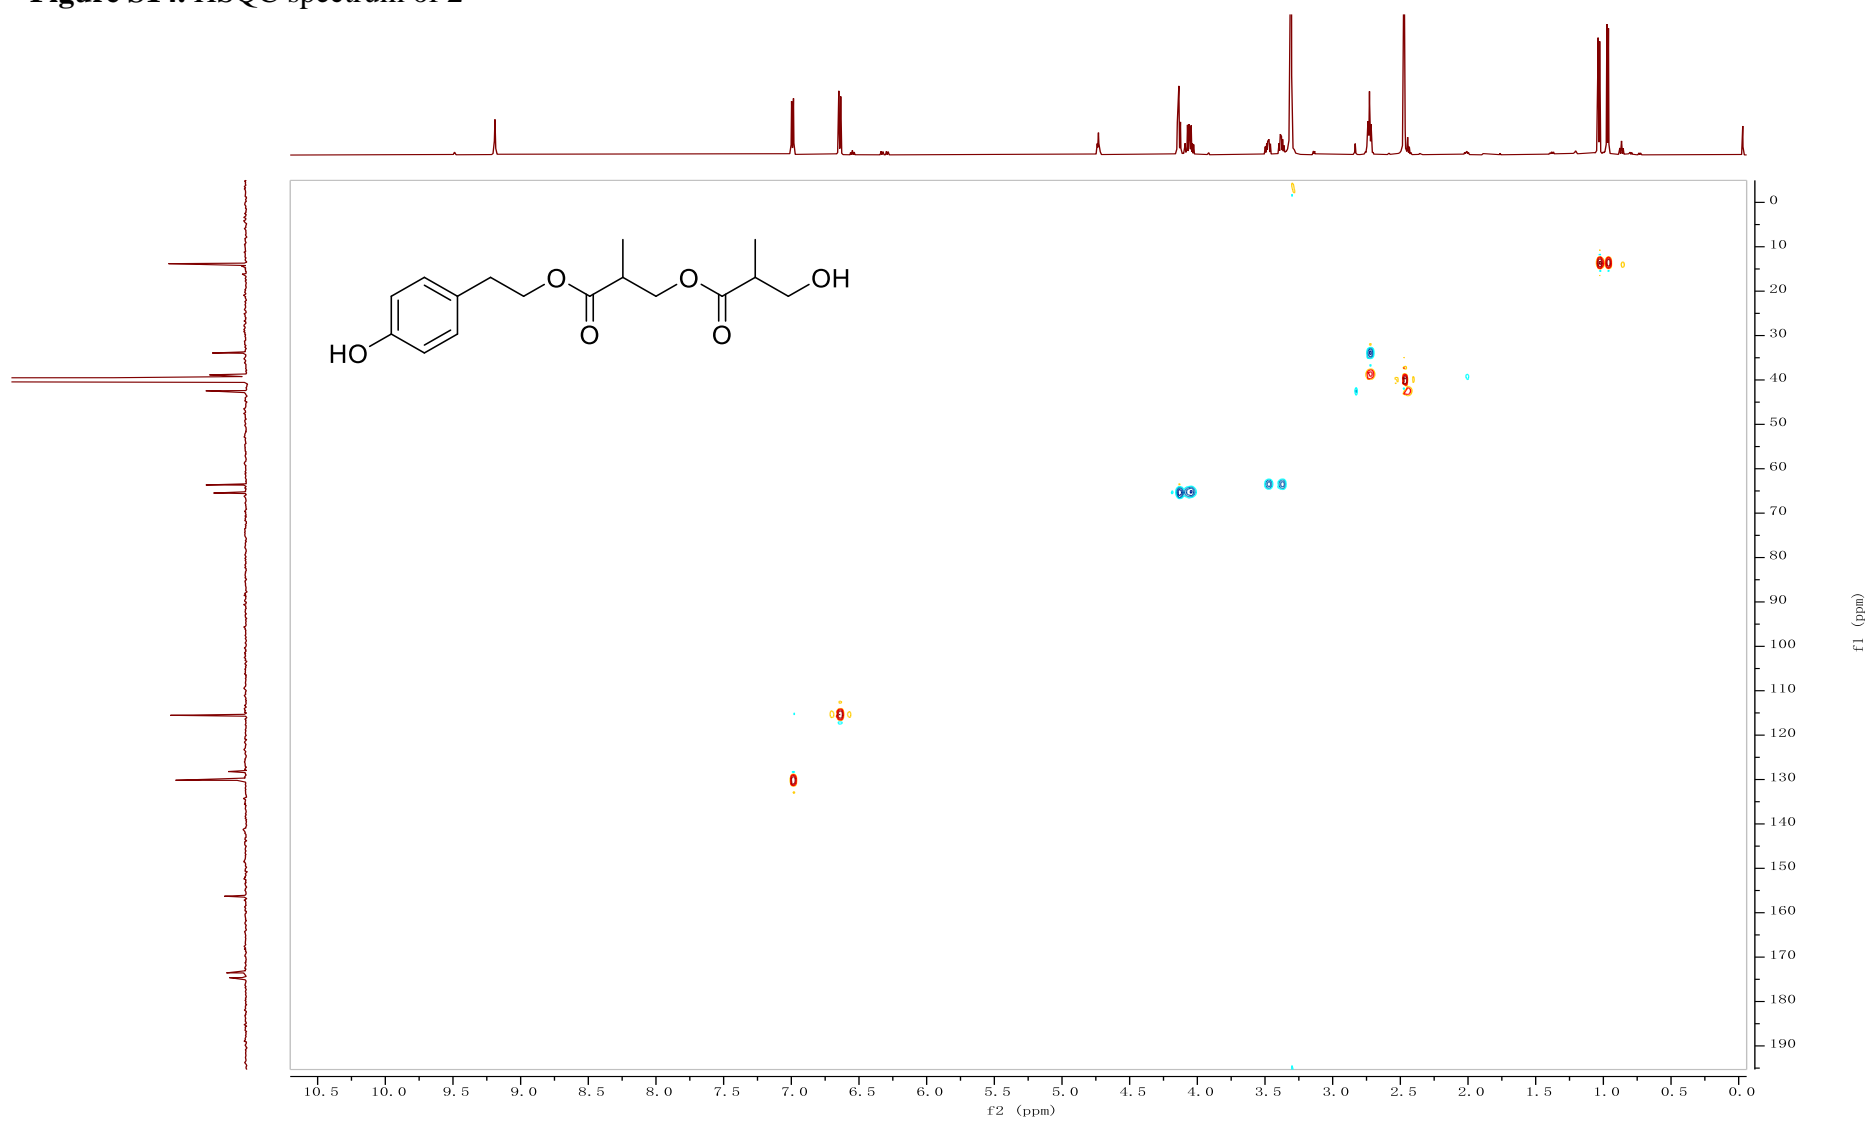

Figure S15. HMBC spectrum of **2**

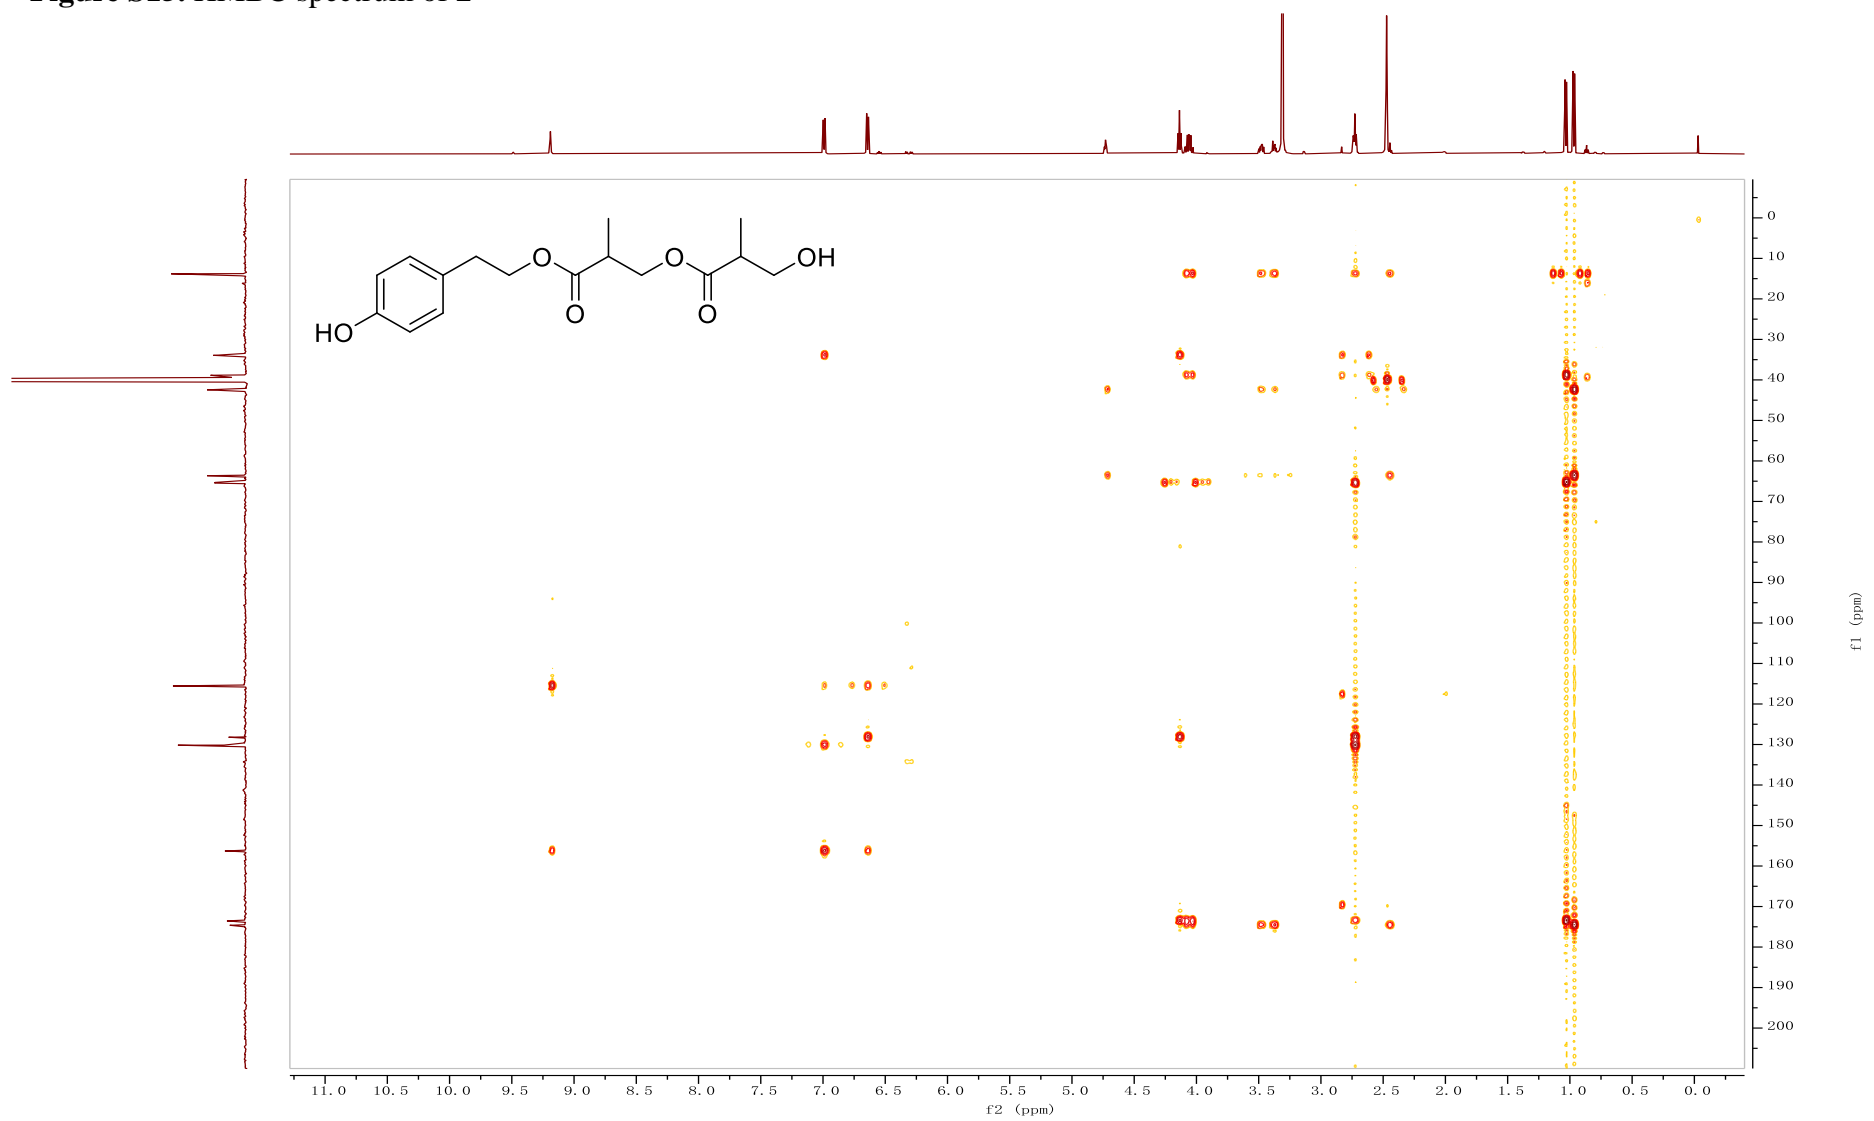

**Figure S16.** HRESIMS spectrum of **2**

770-35-6-3 #43 RT: 0.34 AV: 1 NL: 6.81E7  
T: FTMS + c ESI Full ms [50.00-700.00]

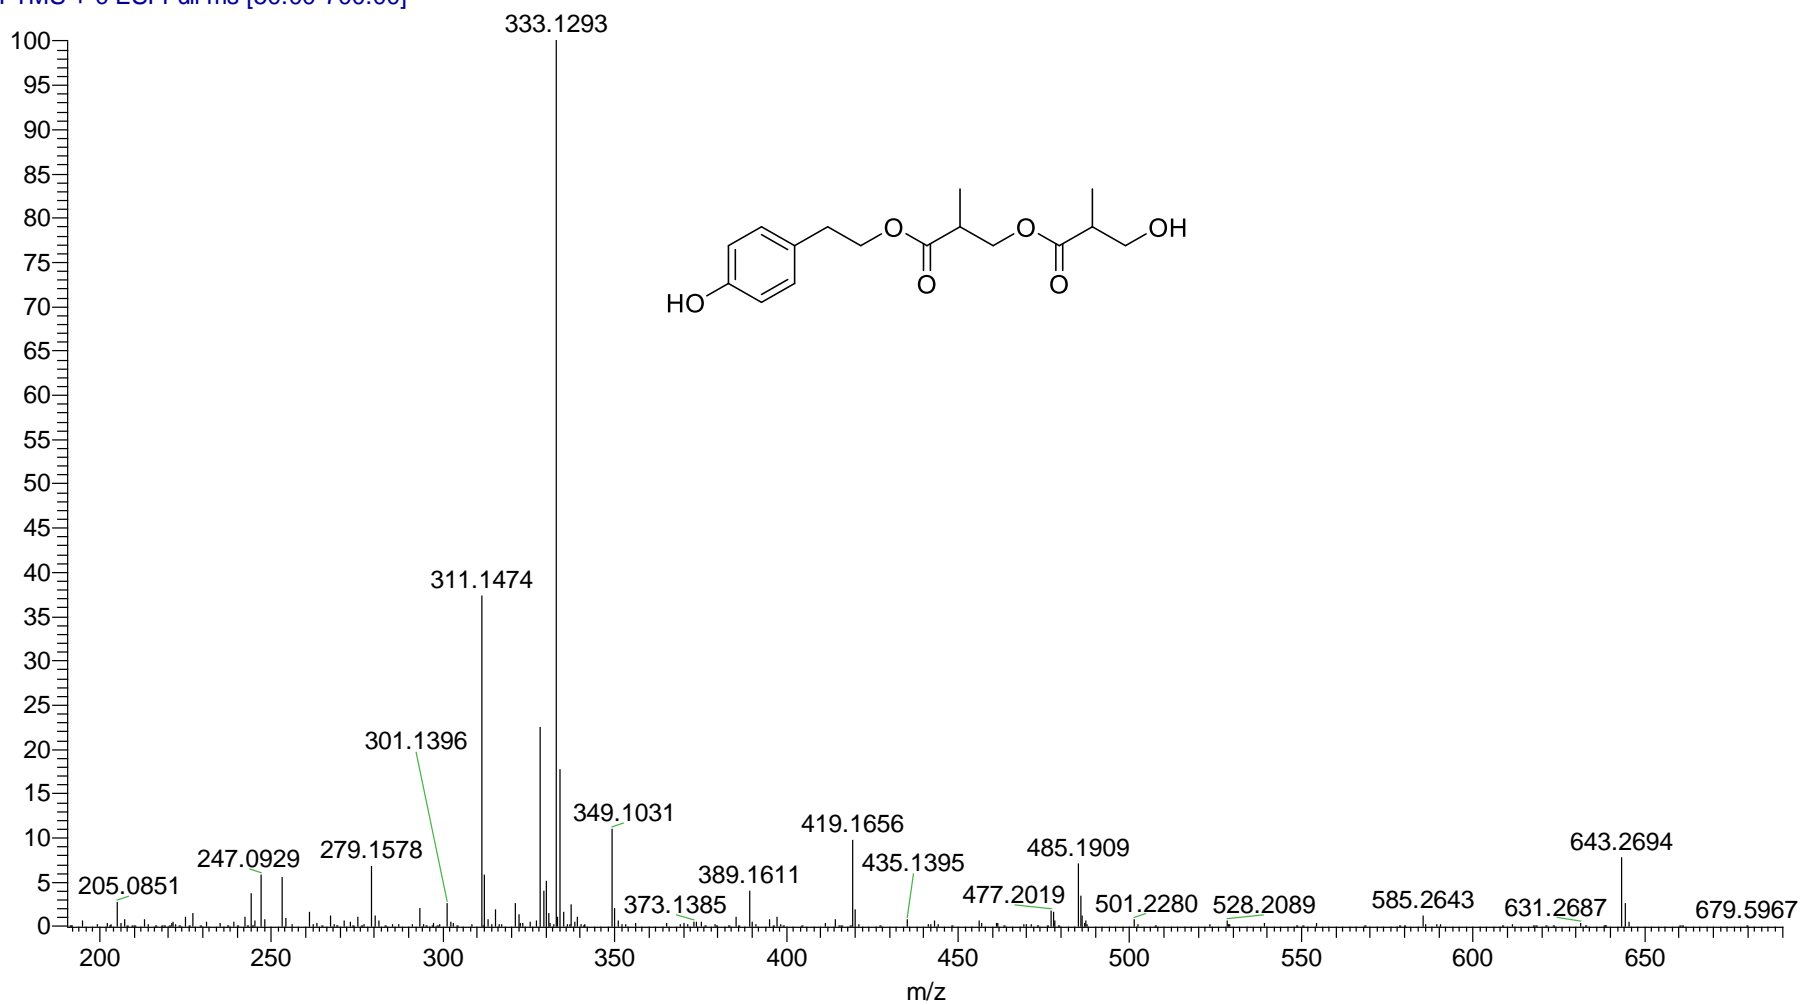

**Figure S17.** IR spectrum of **2**

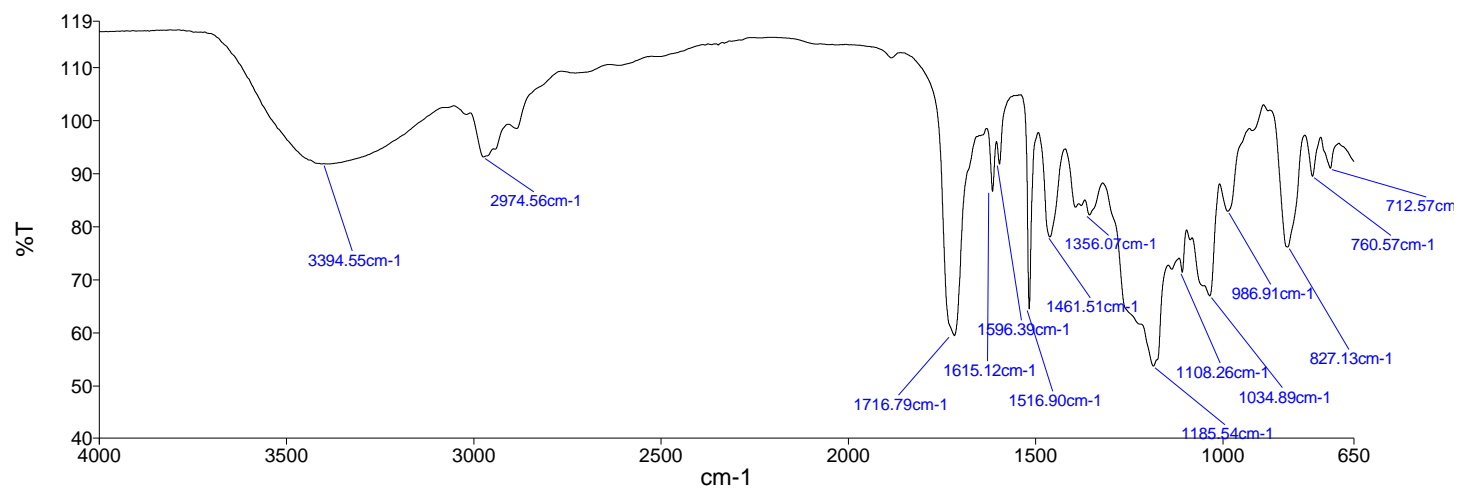

**Figure S18.** UV spectrum of **2**

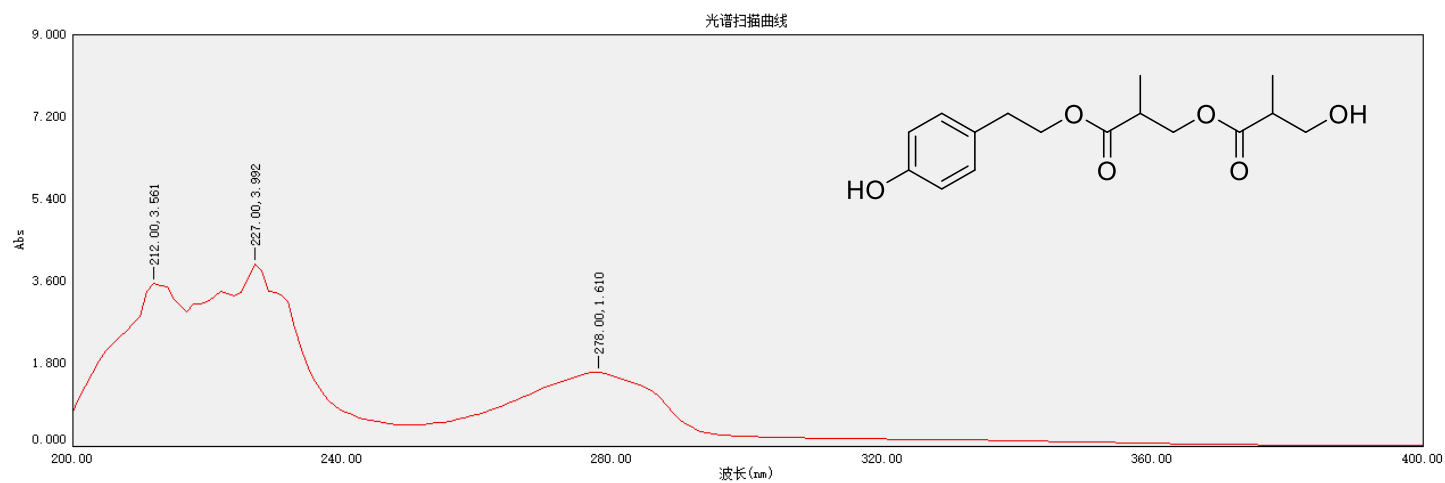

Figure S19. <sup>1</sup>H NMR spectrum of **3**

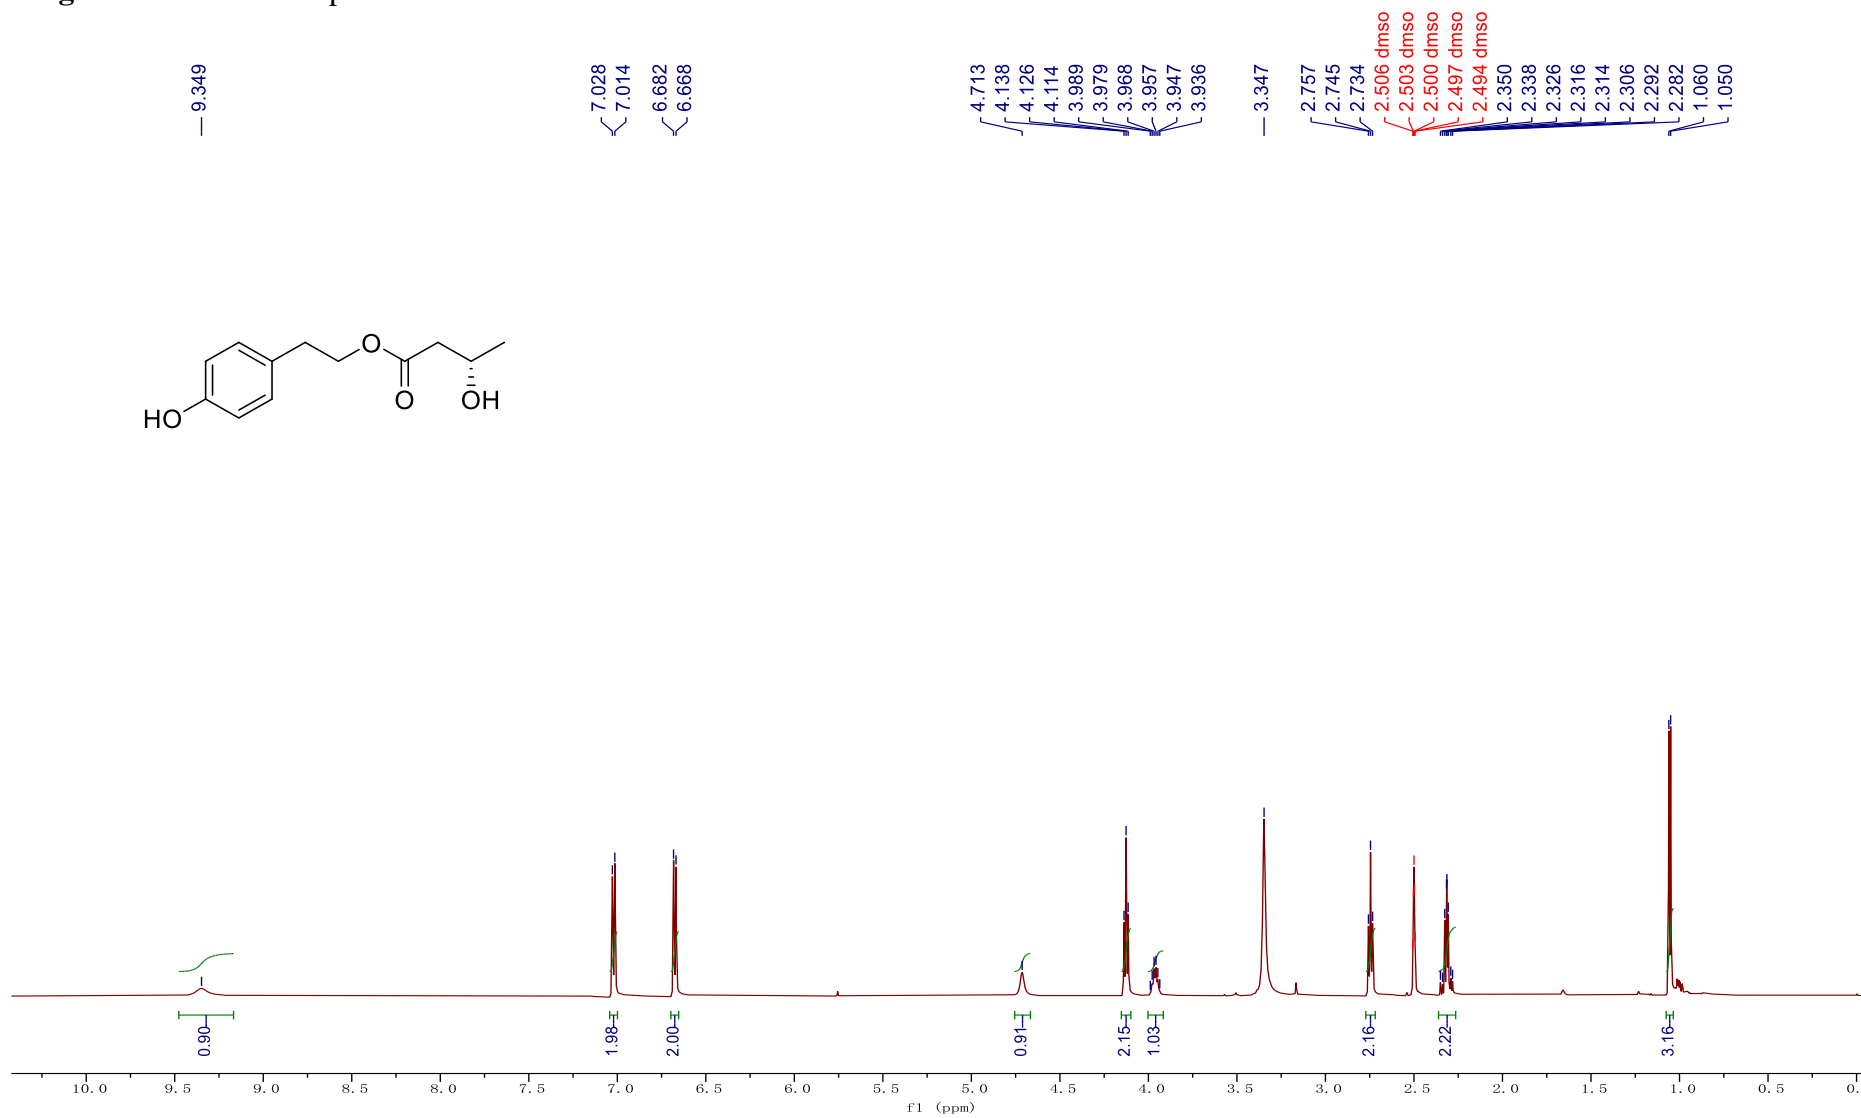

Figure S20.  $^{13}\text{C}$  NMR spectrum of **3**

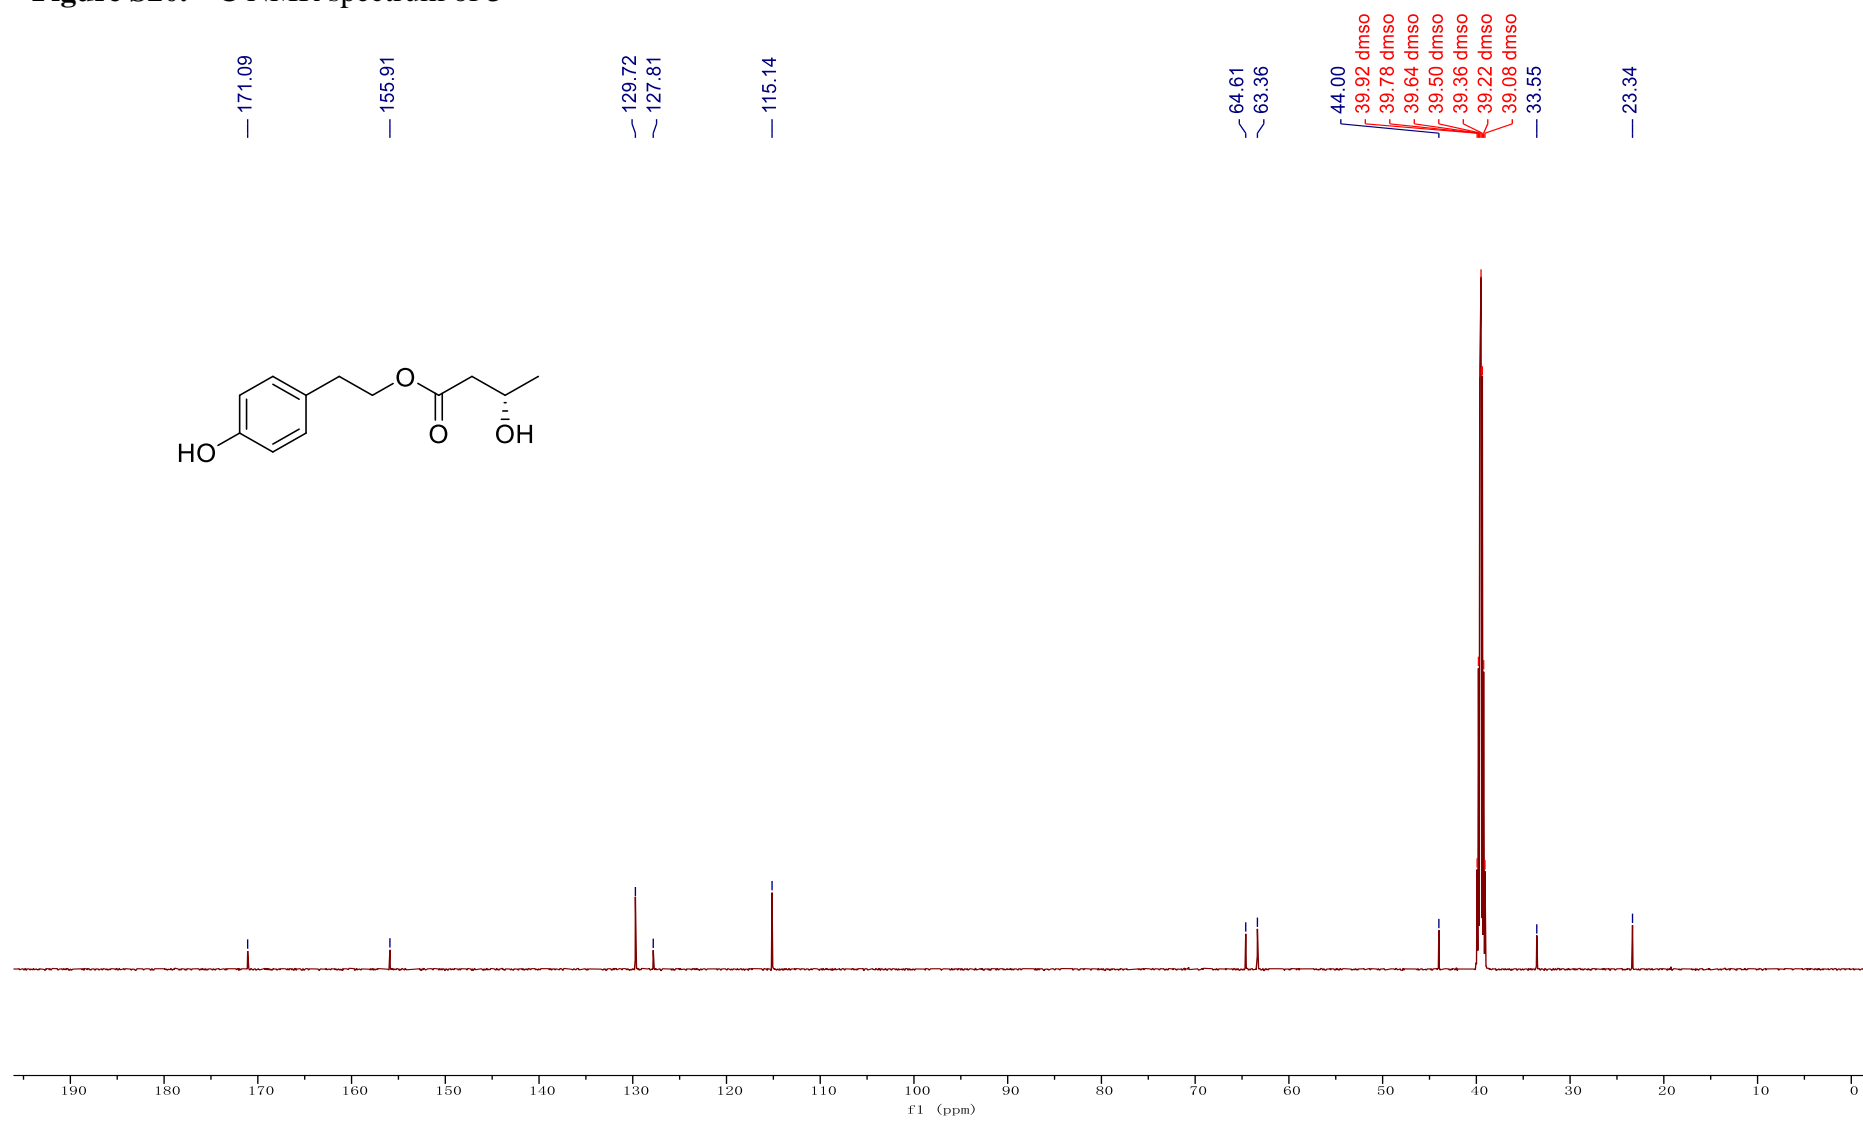

**Figure S21.** DEPT spectrum of **3**

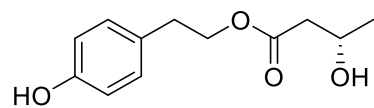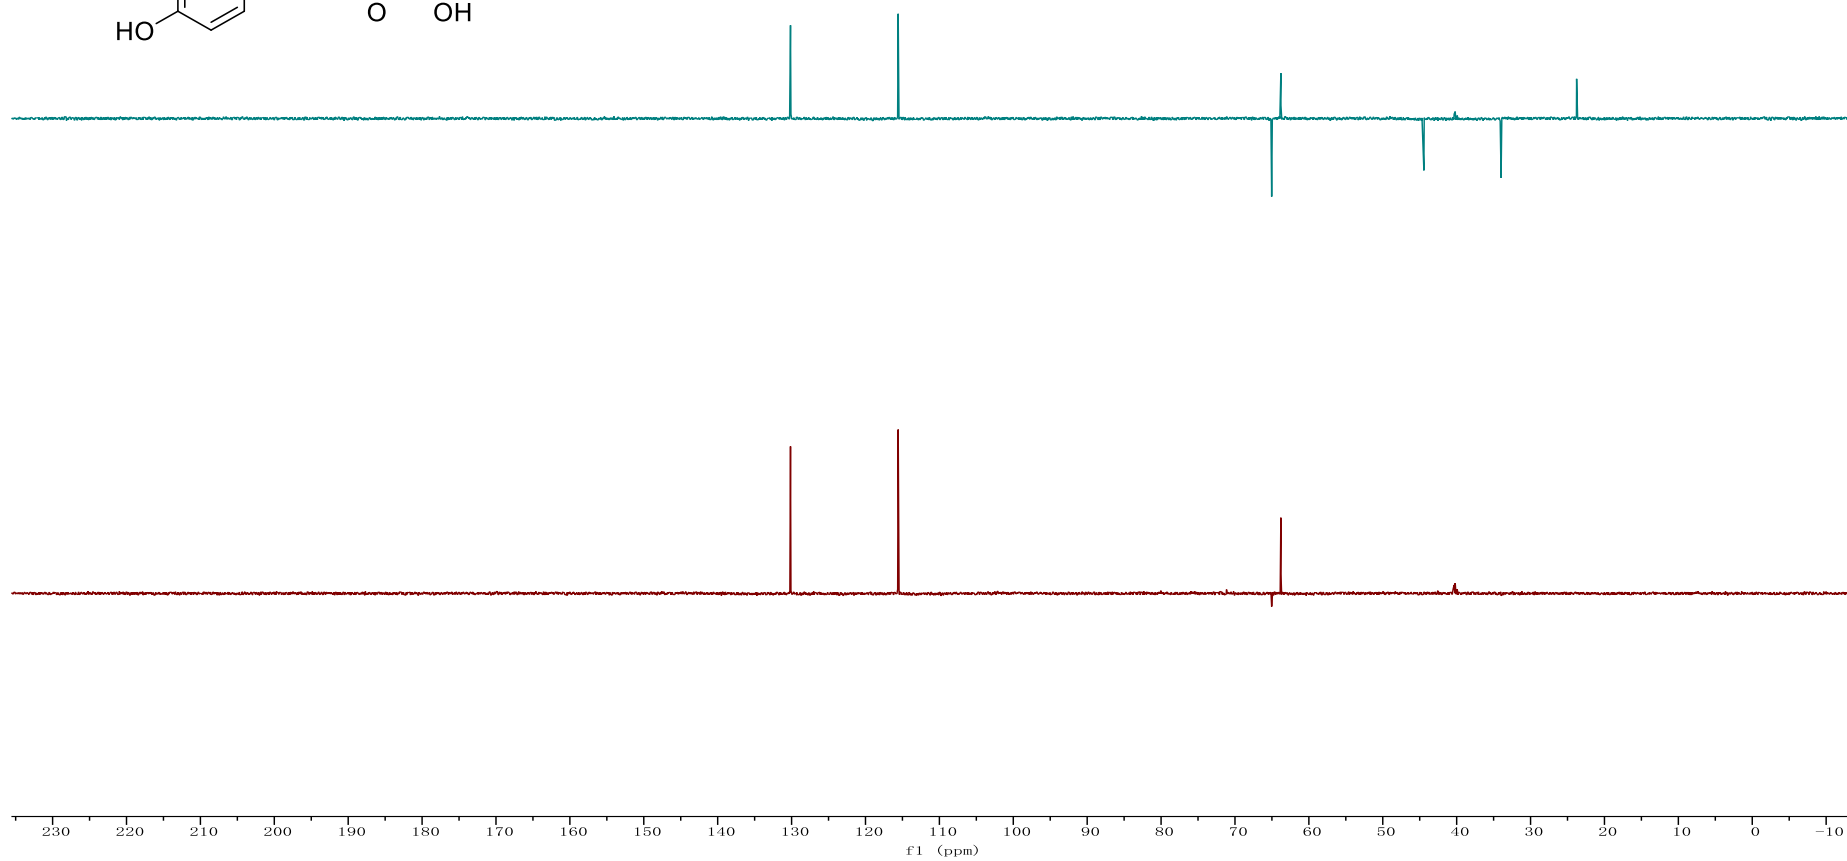

Figure S22.  $^1\text{H}$ - $^1\text{H}$  COSY spectrum of **3**

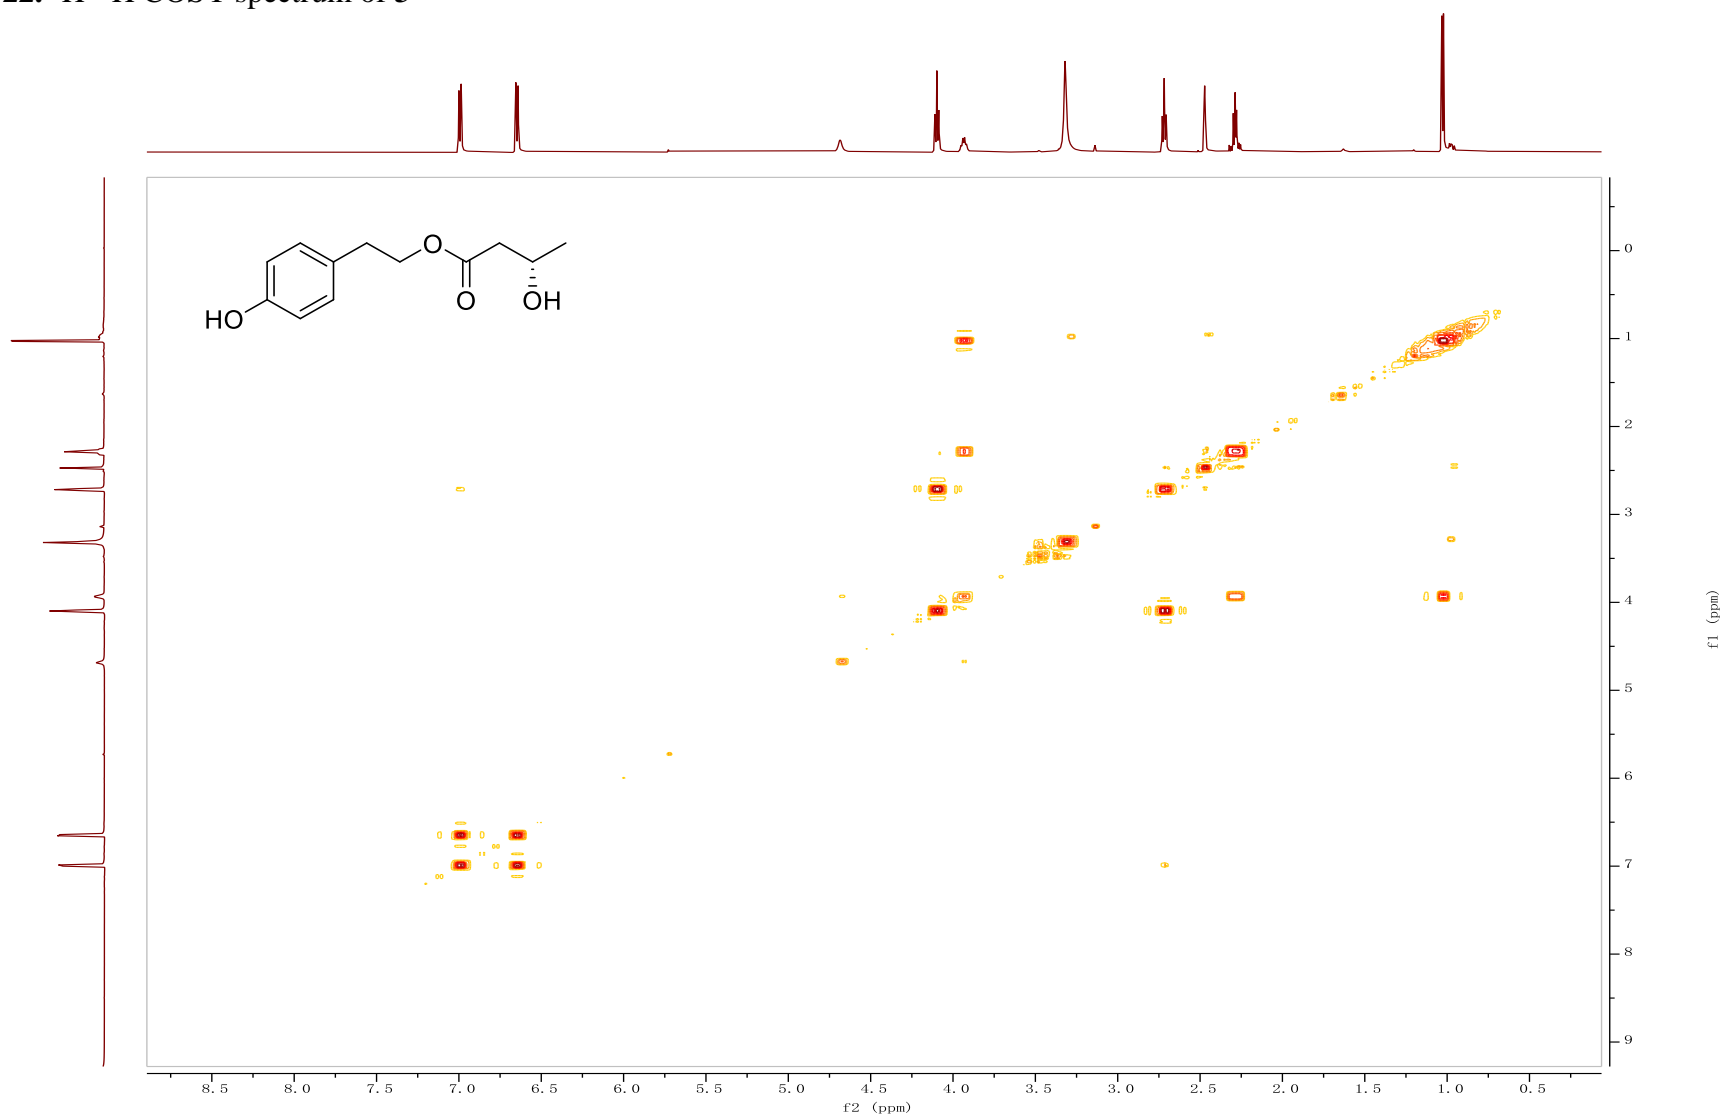



Figure S23. HSQC spectrum of **3**

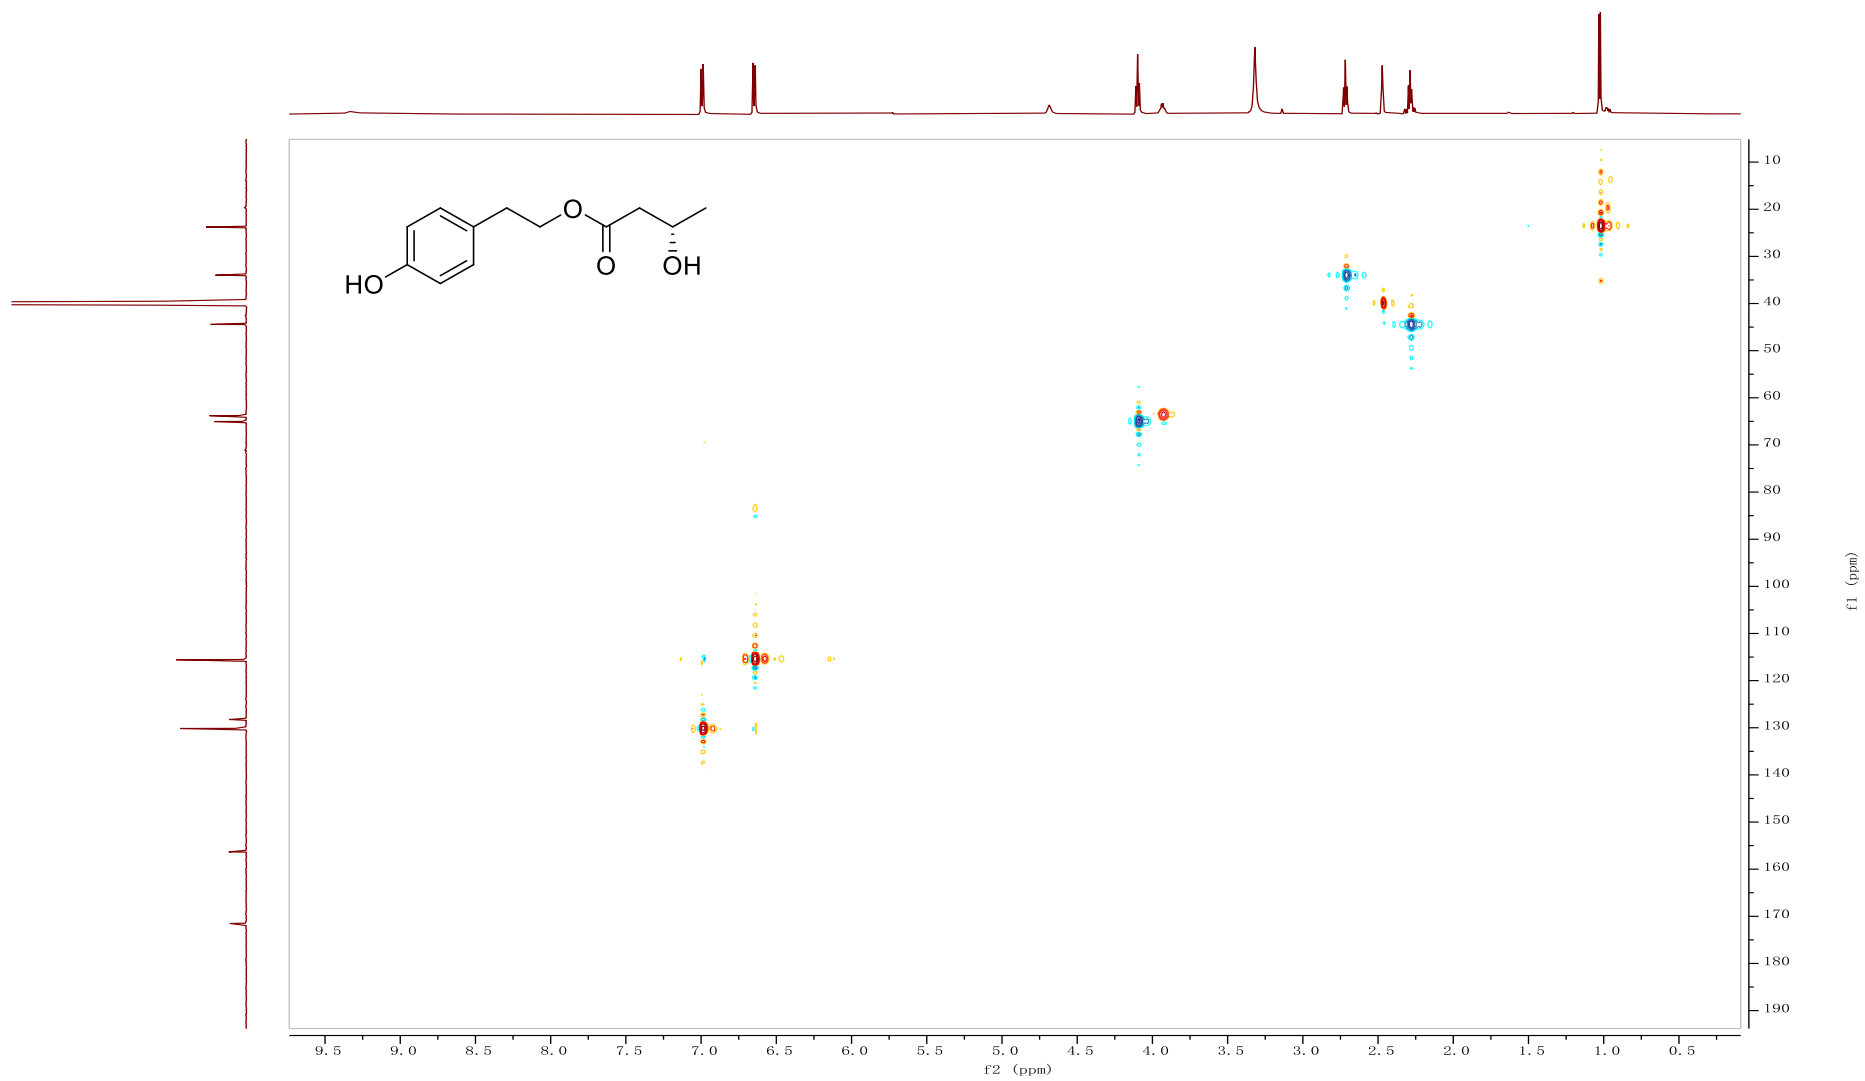

Figure S24. HMBC spectrum of **3**

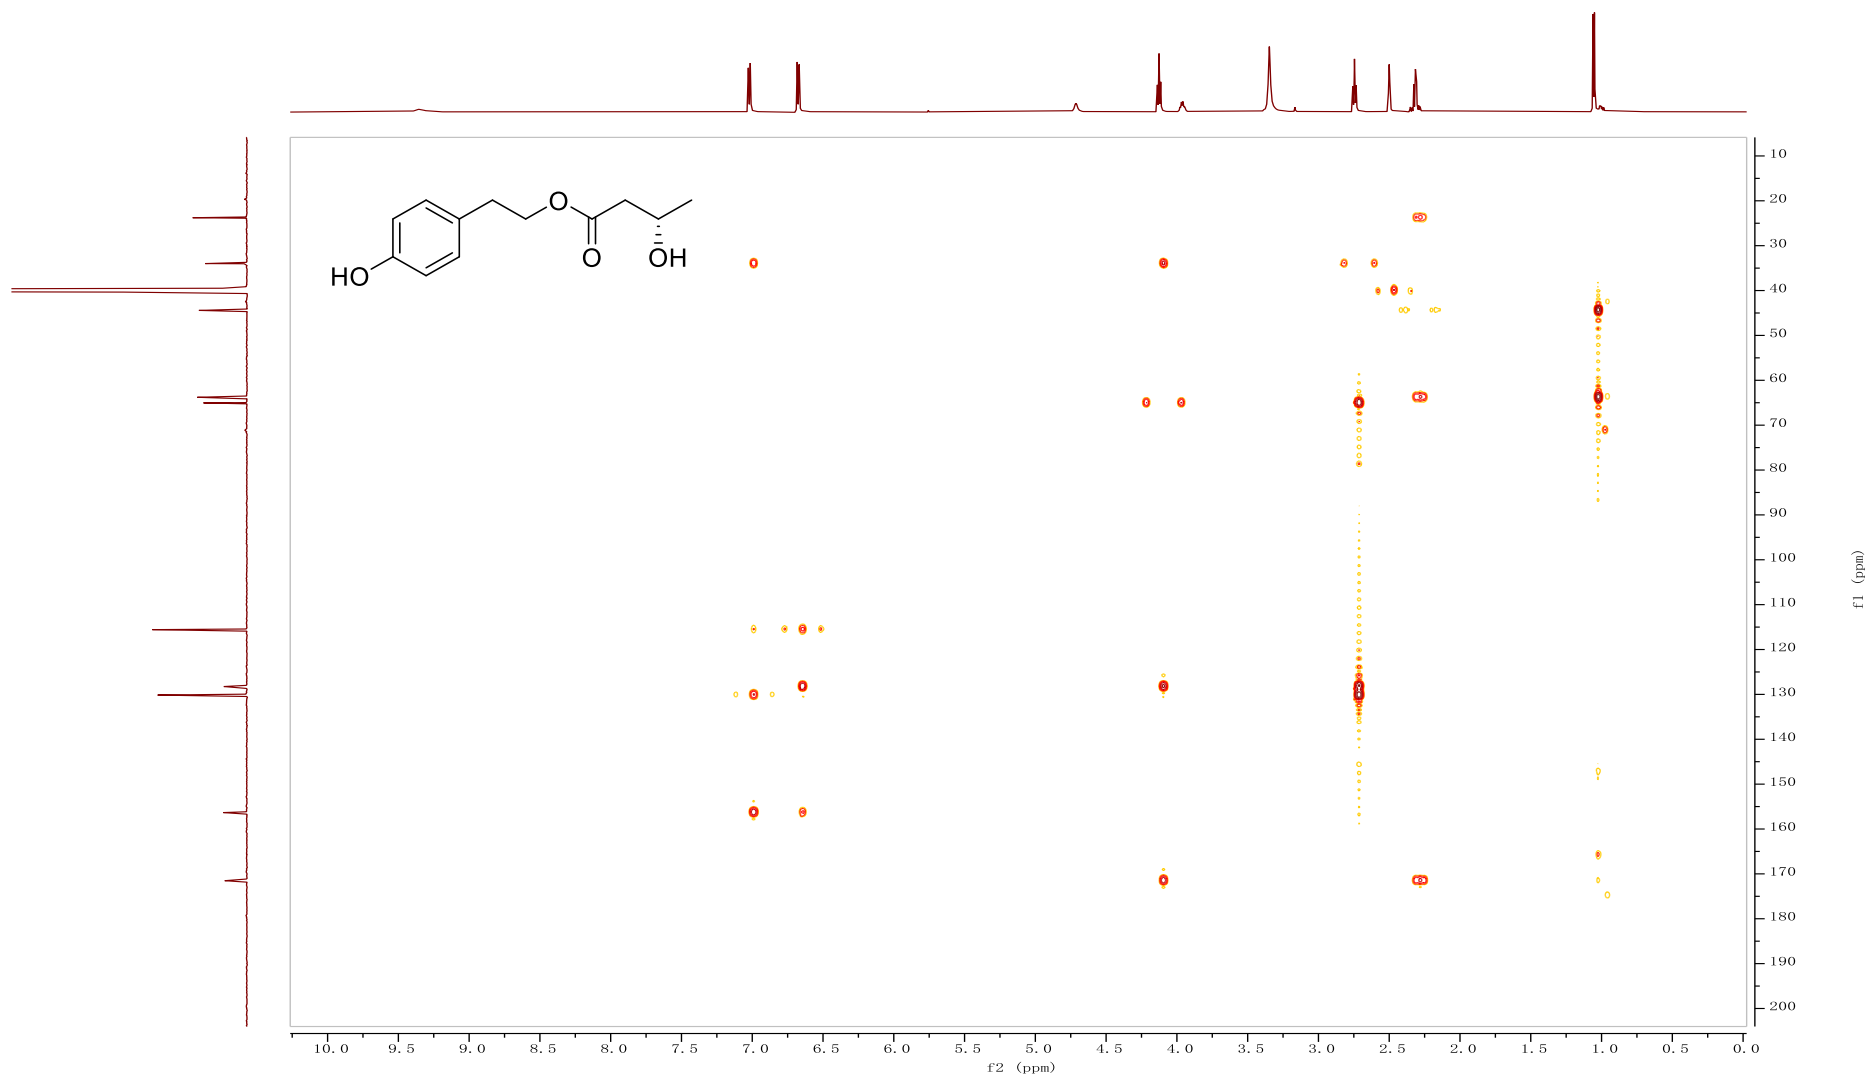

**Figure S25.** HRESIMS spectrum of **3**

/70-35-5-1 #64 RI: 0.50 AV: 1 NL: 7.6/E/  
T: FTMS + c ESI Full ms [100.00-800.00]

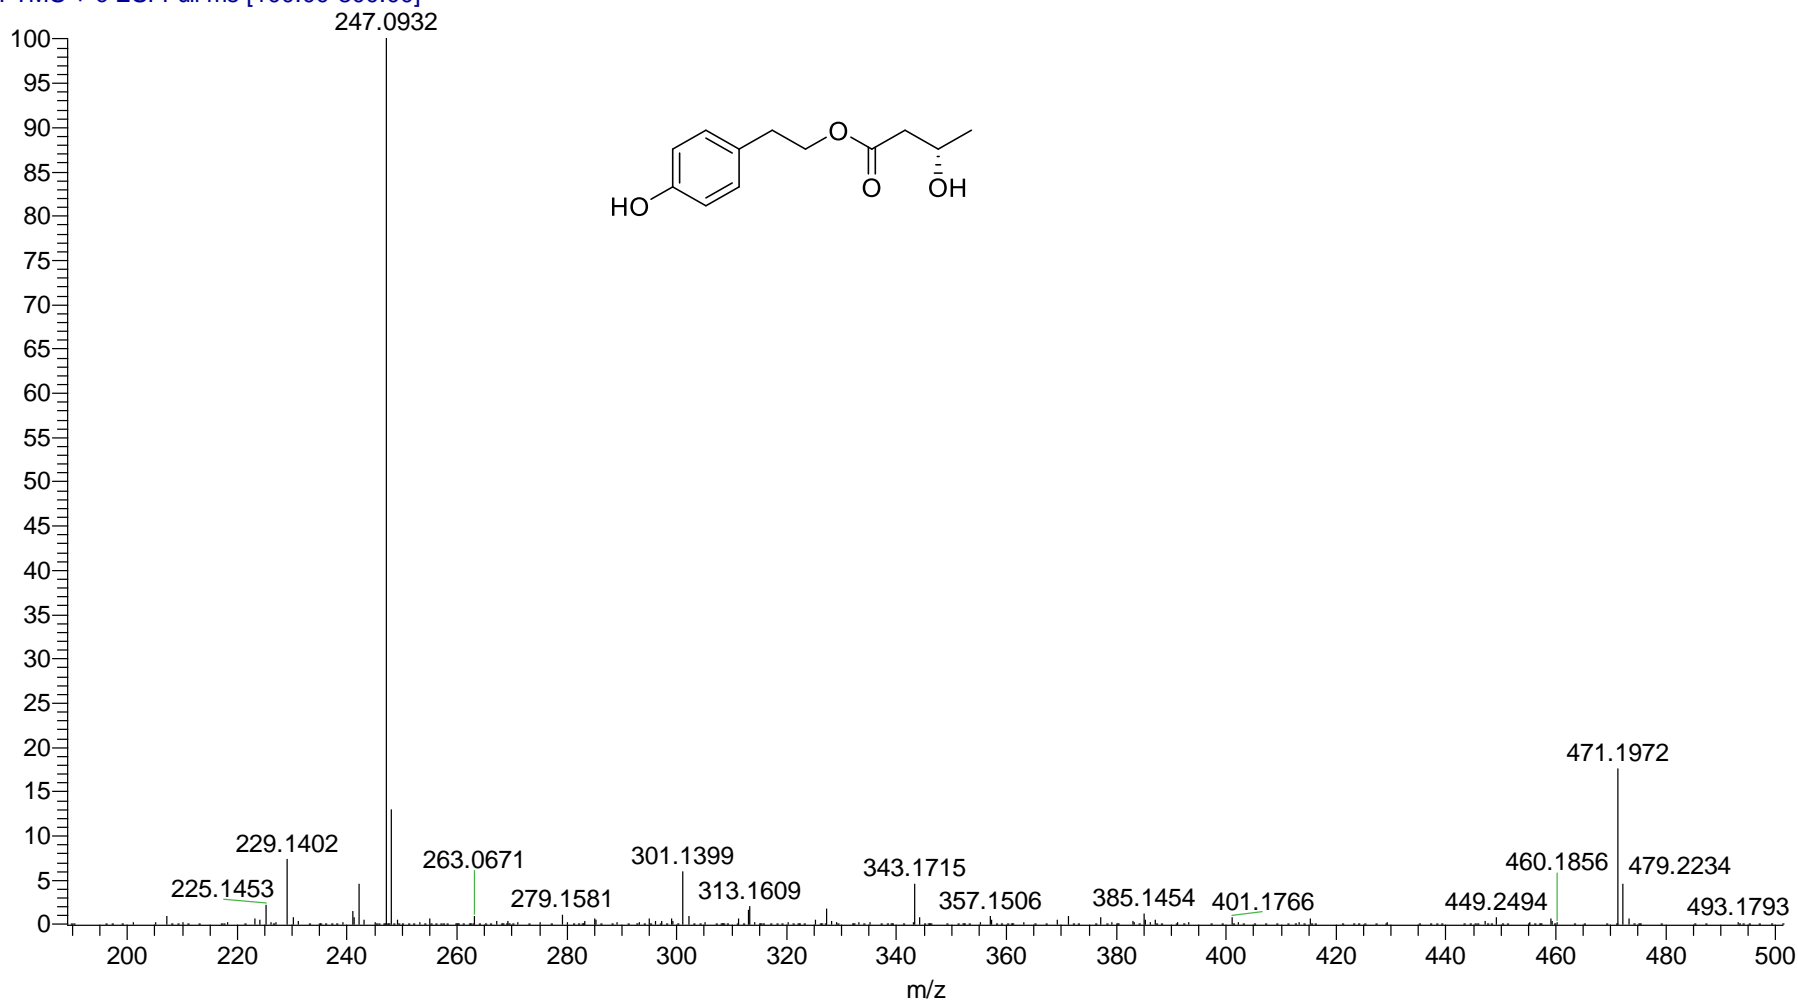

**Figure S26.** IR spectrum of **3**

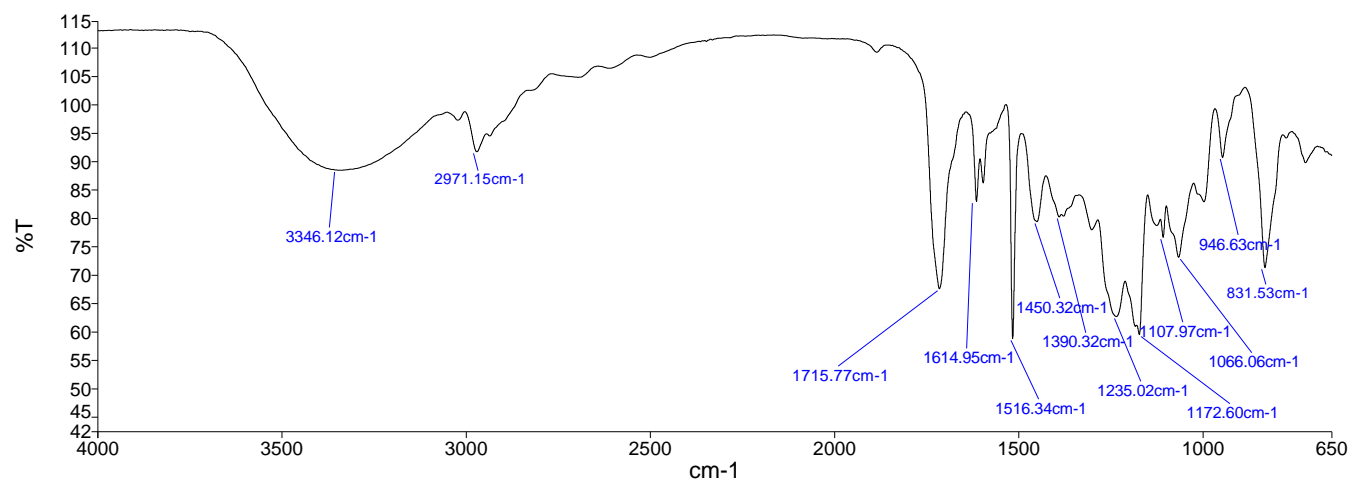

**Figure S27.** UV spectrum of **3**

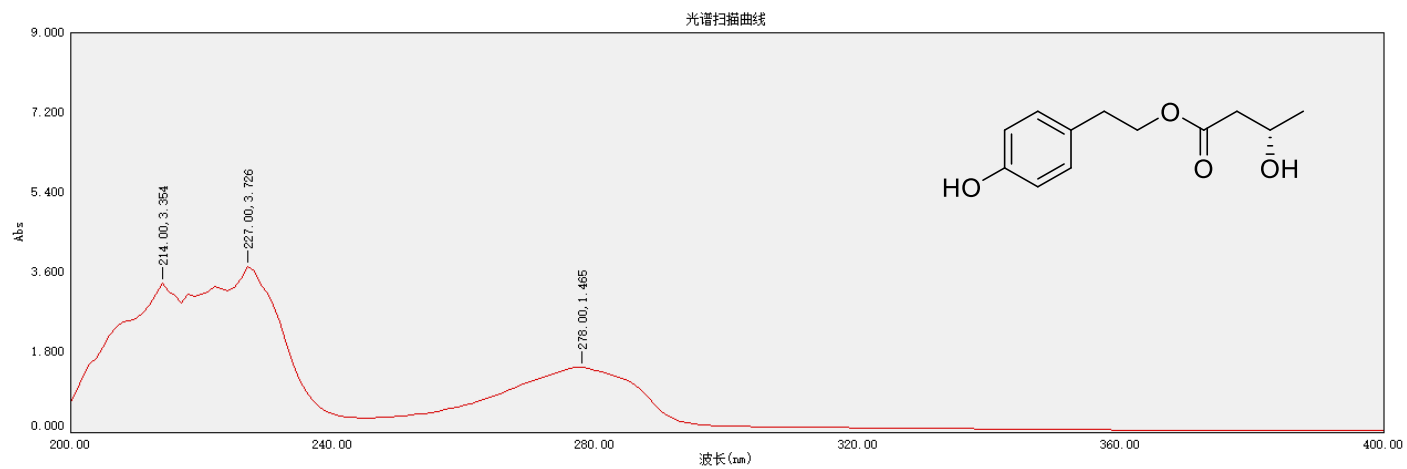

Figure S28. <sup>1</sup>H NMR spectrum of **9**

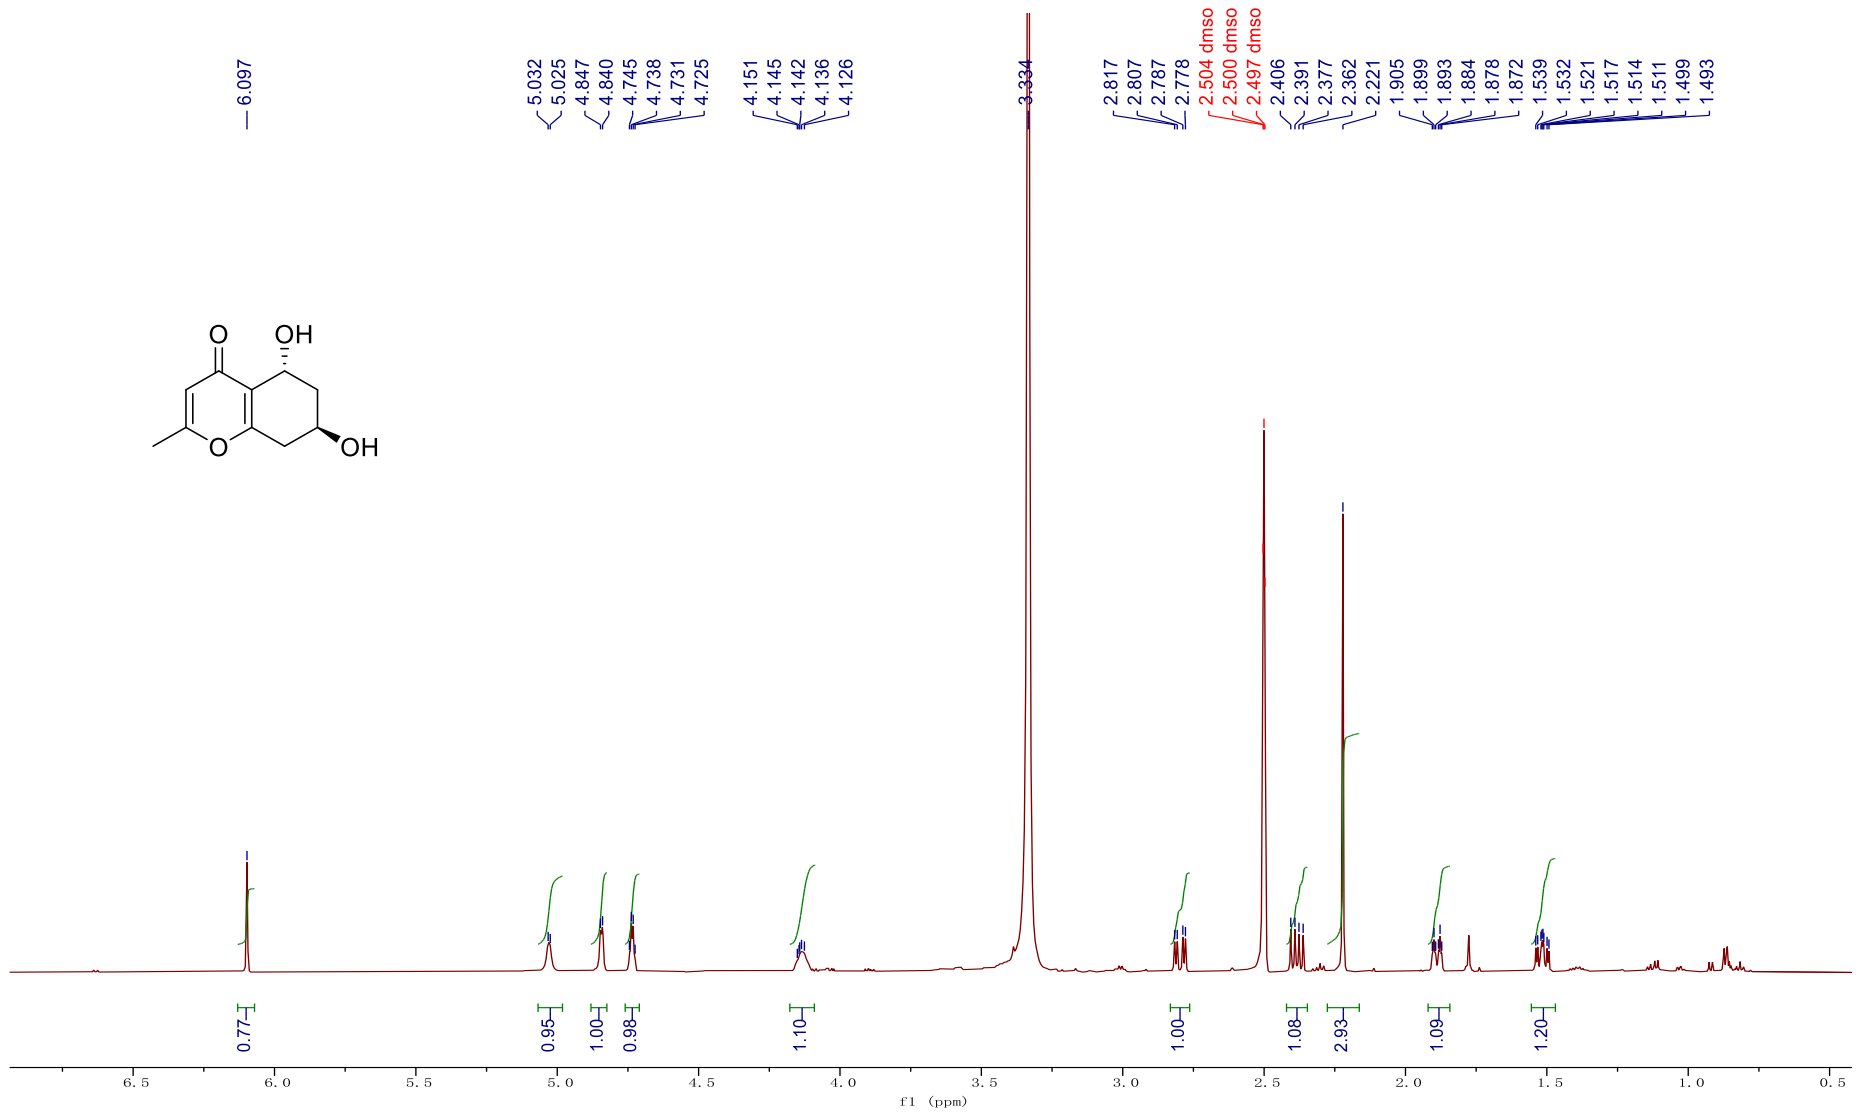

Figure S29.  $^{13}\text{C}$  NMR spectrum of **9**

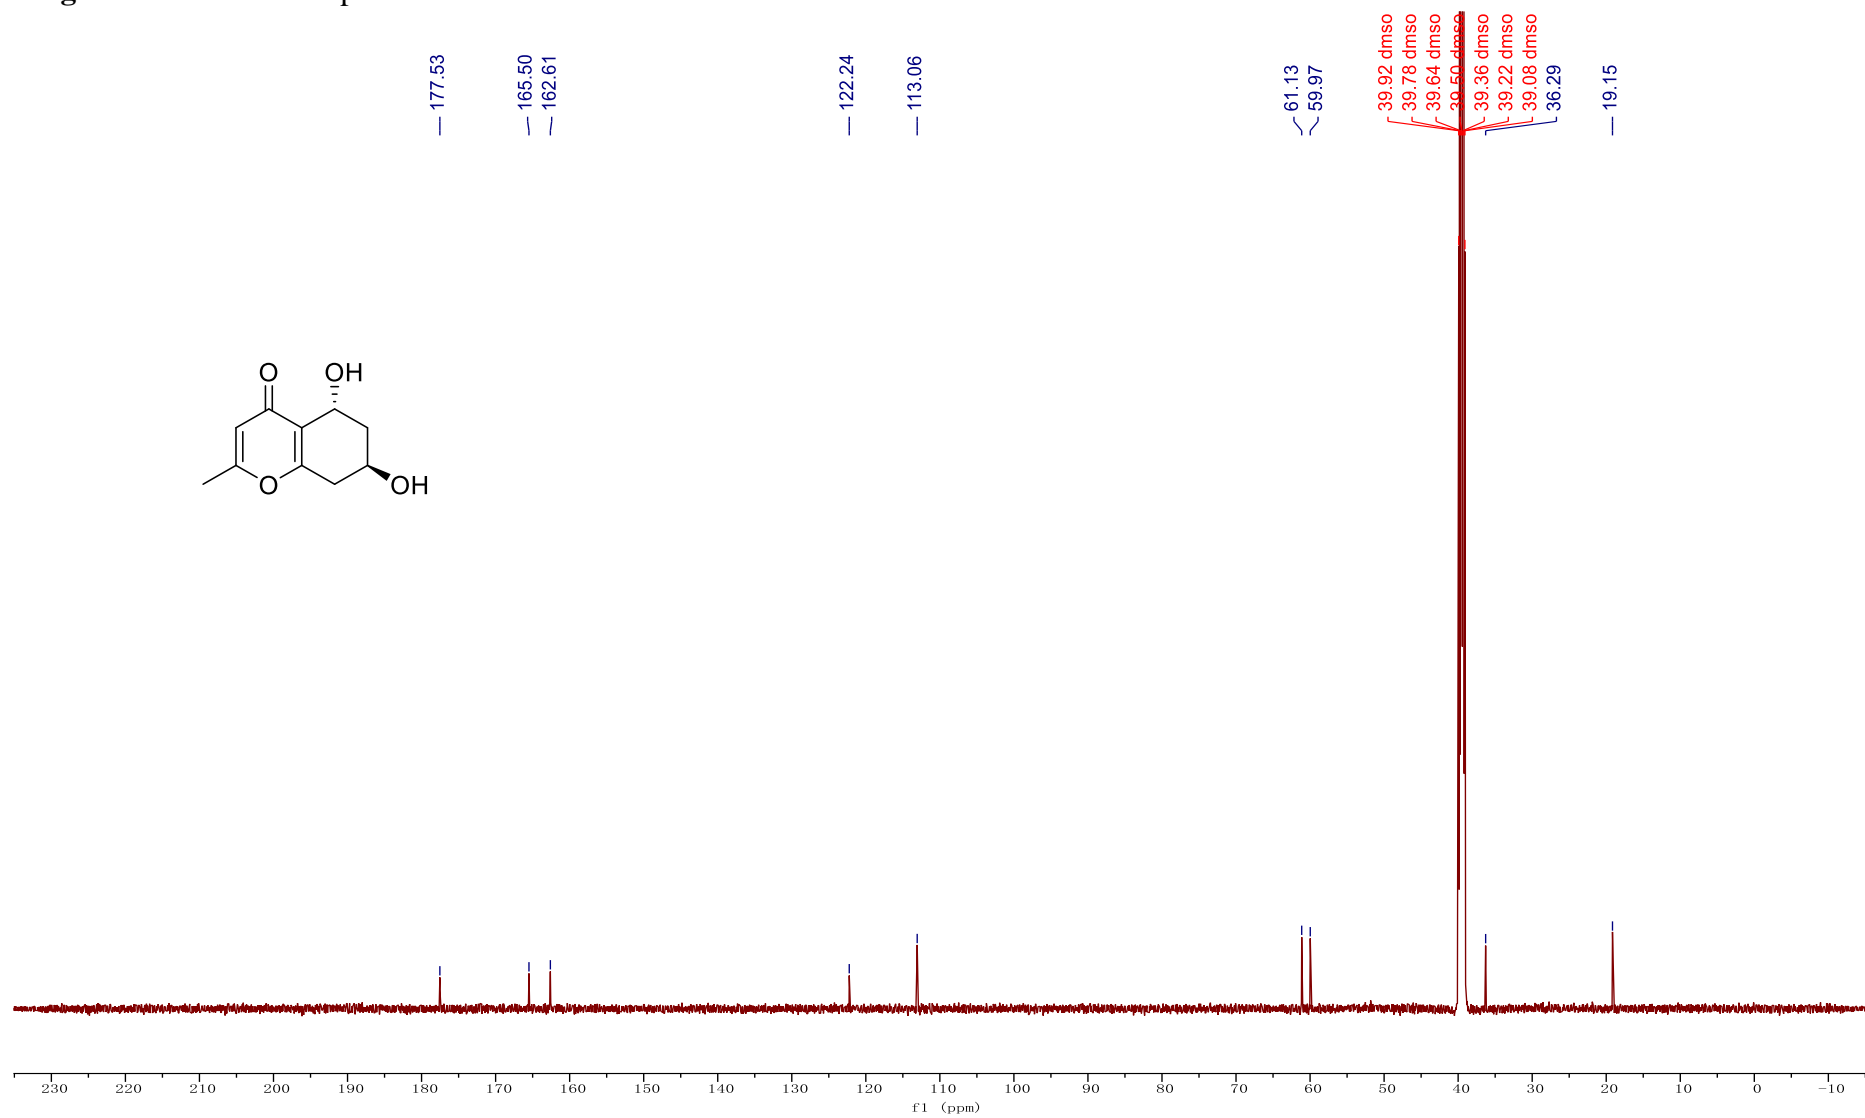

**Figure S30.** DEPT spectrum of **9**

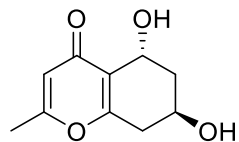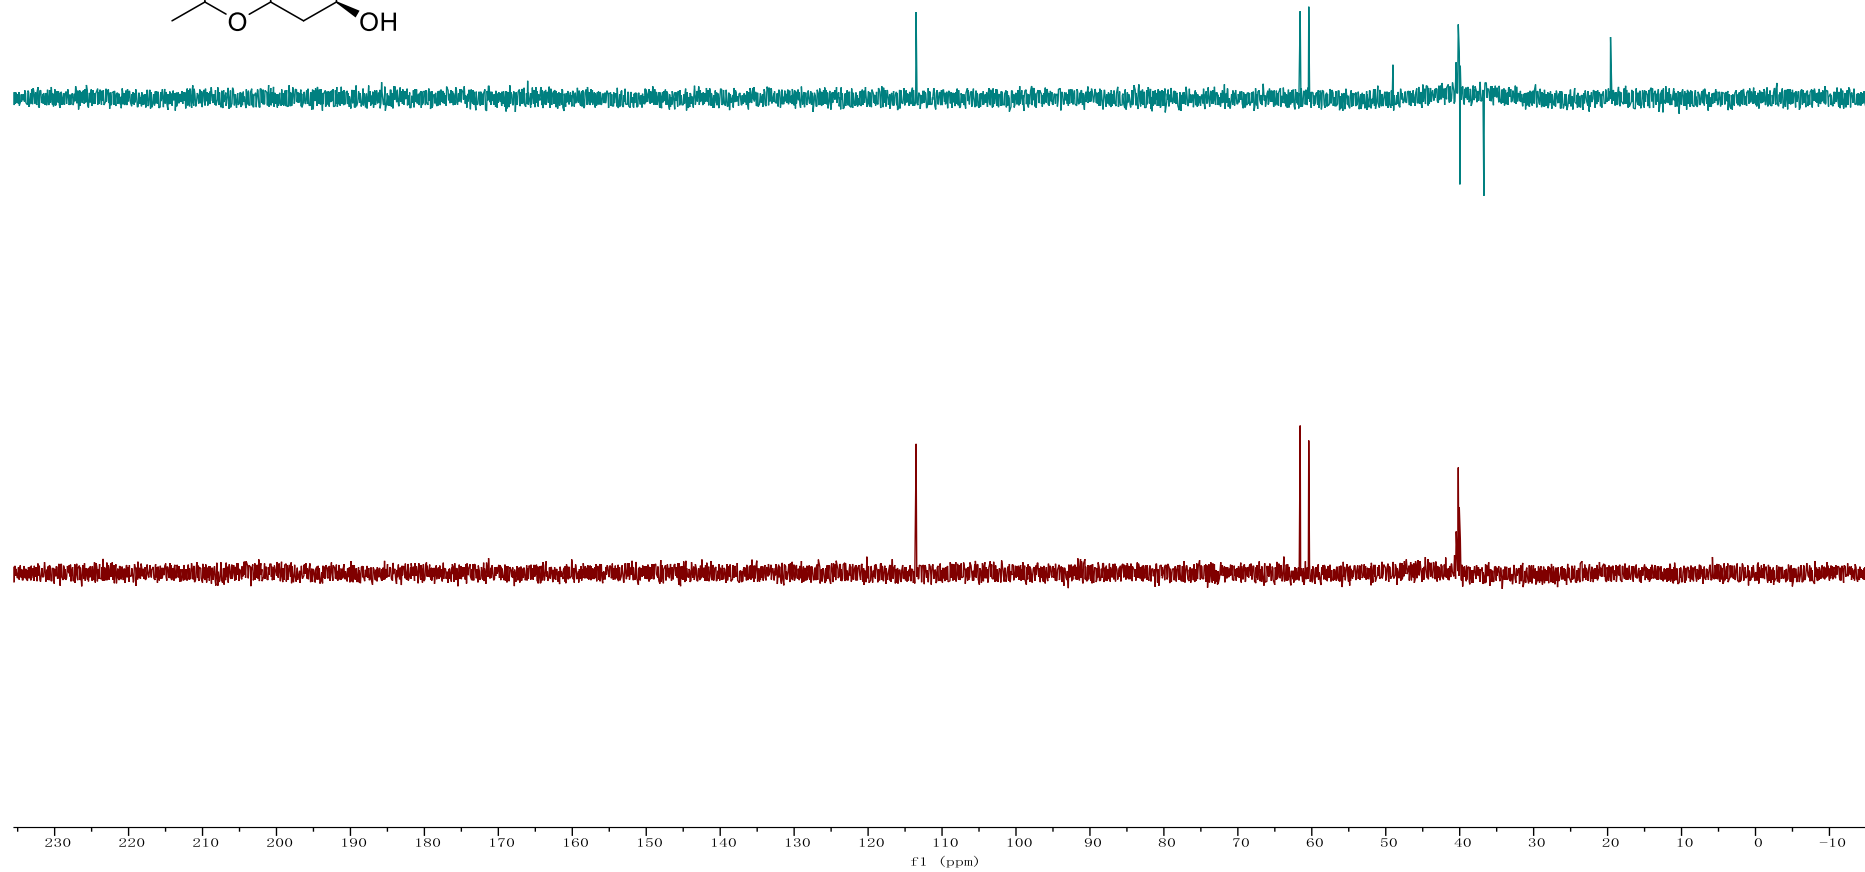

**Figure S31.**  $^1\text{H}$ - $^1\text{H}$  COSY spectrum of **9**

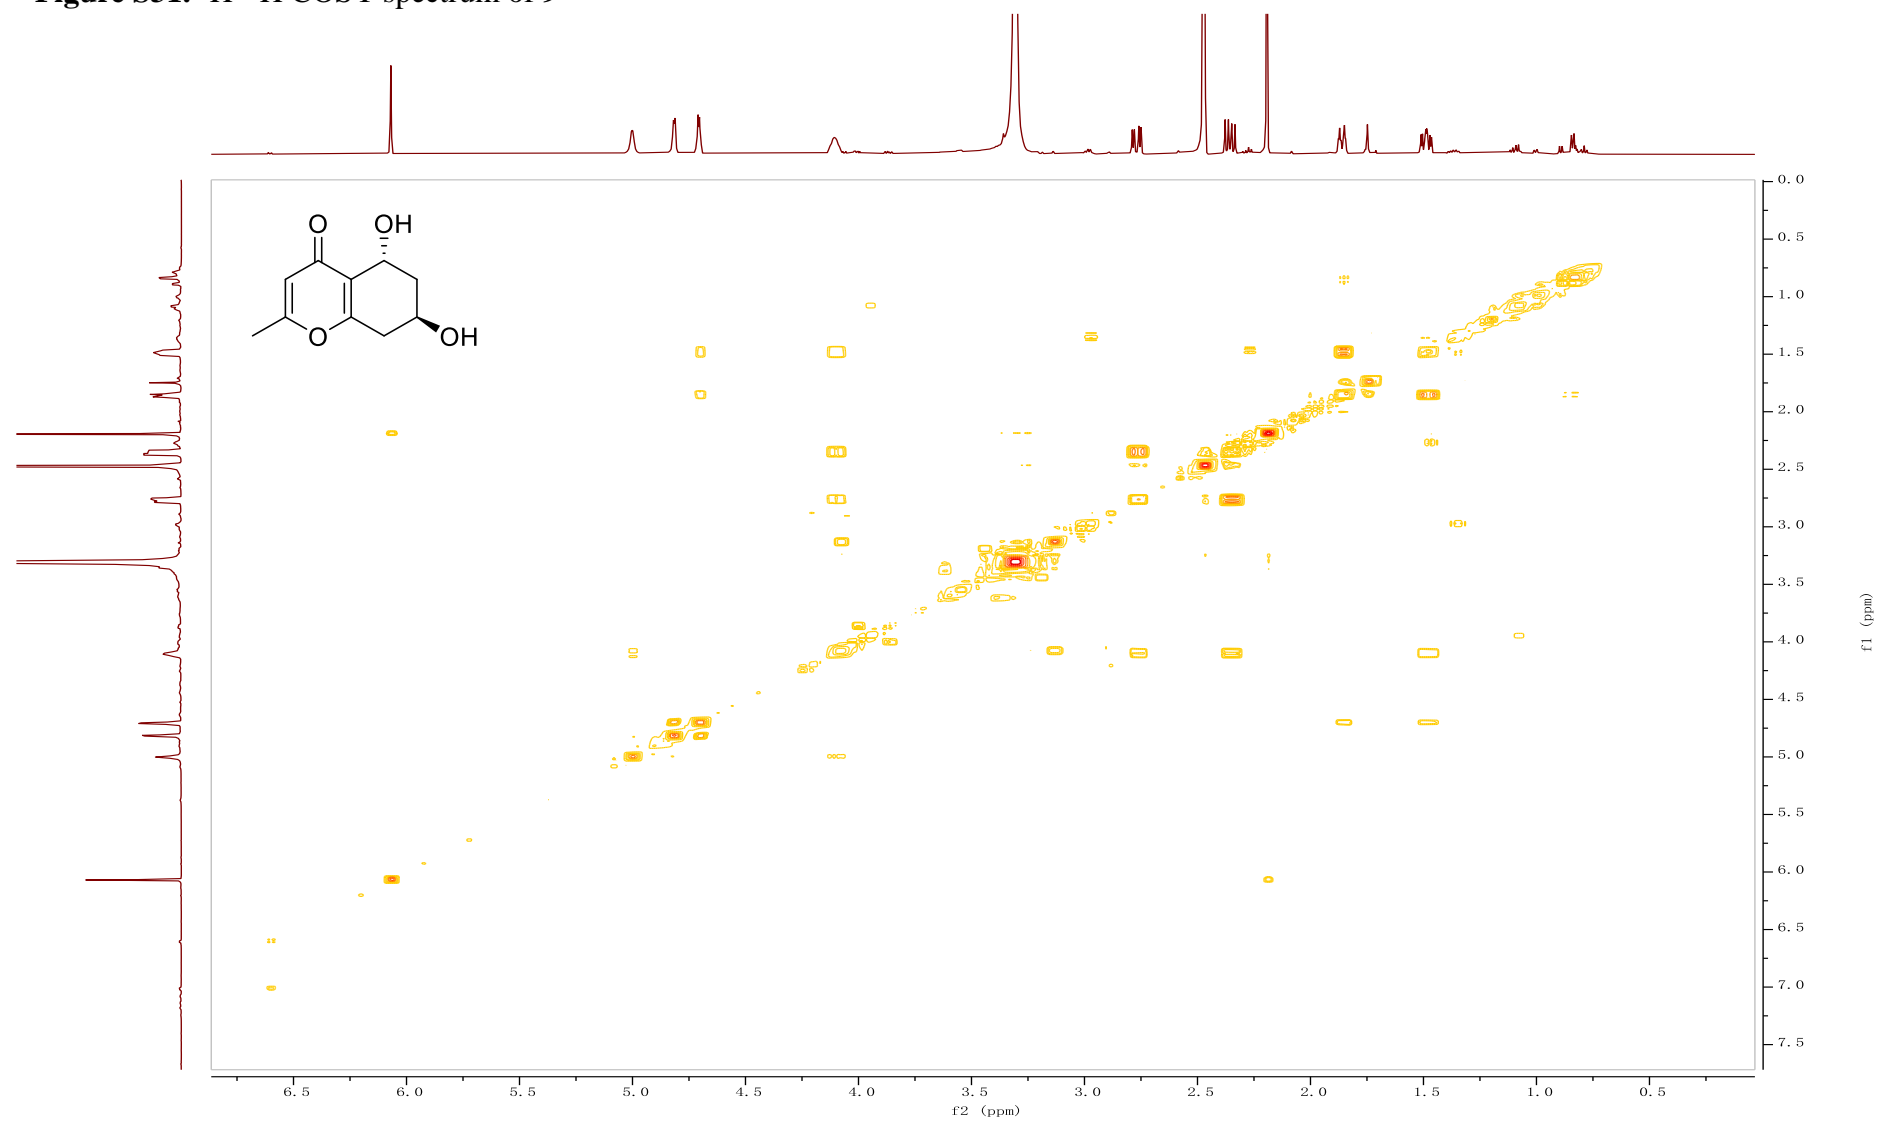



Figure S32. HSQC spectrum of **9**

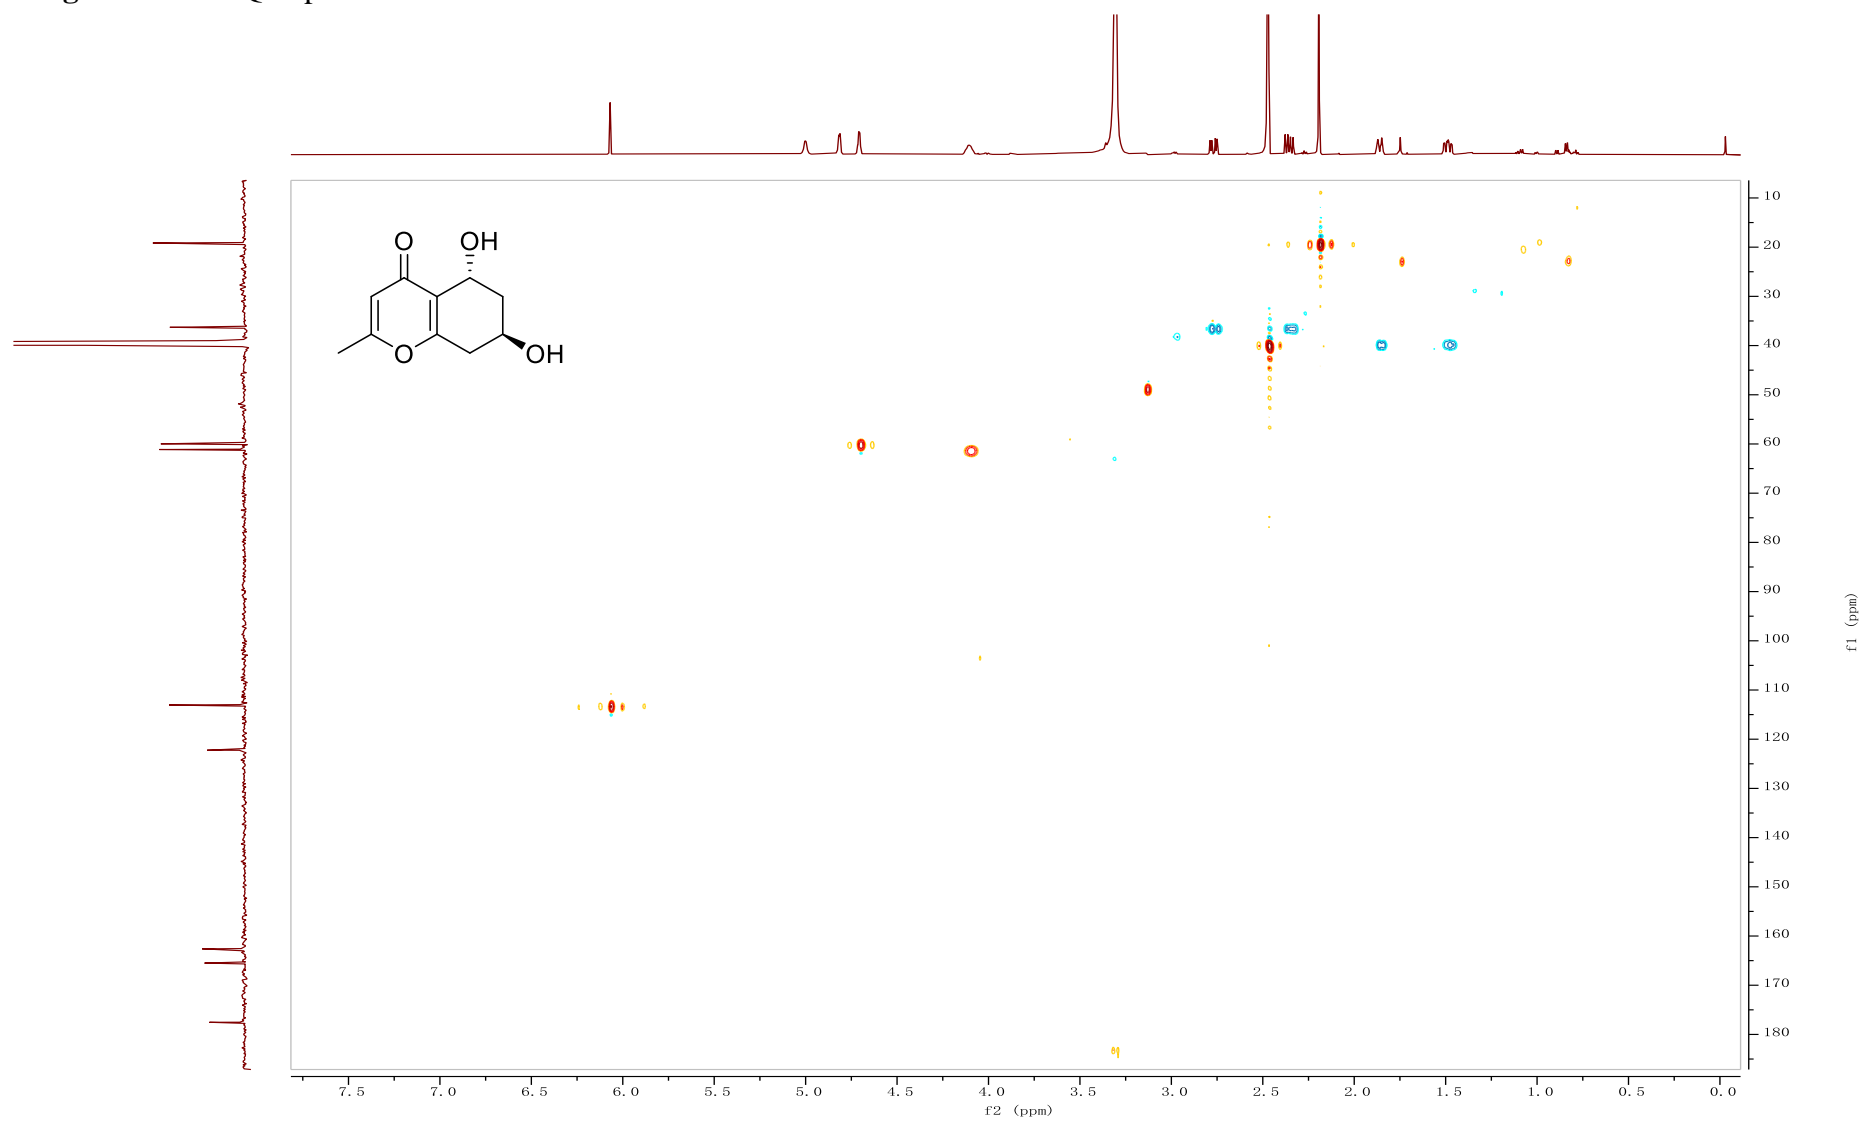

Figure S33. HMBC spectrum of **9**

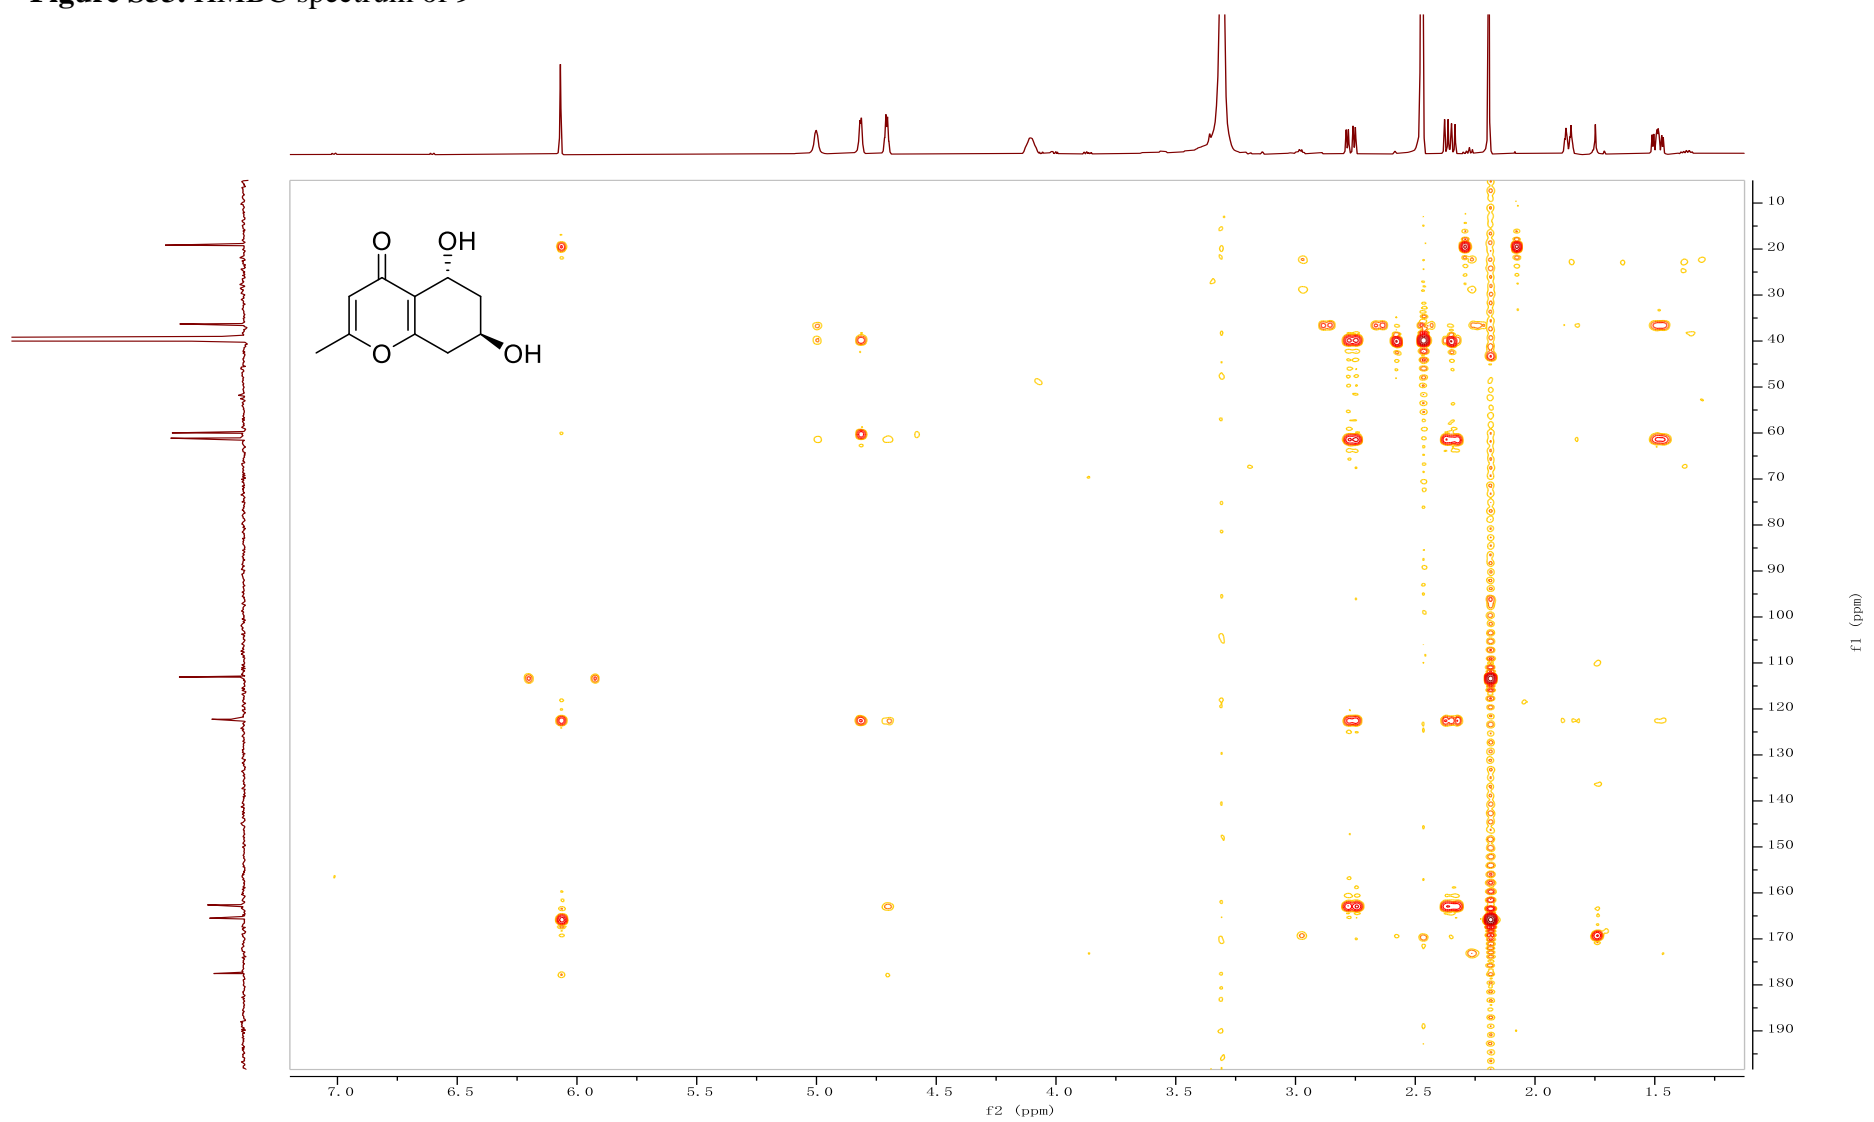

Figure S34. 1D NOE spectrum of **9**

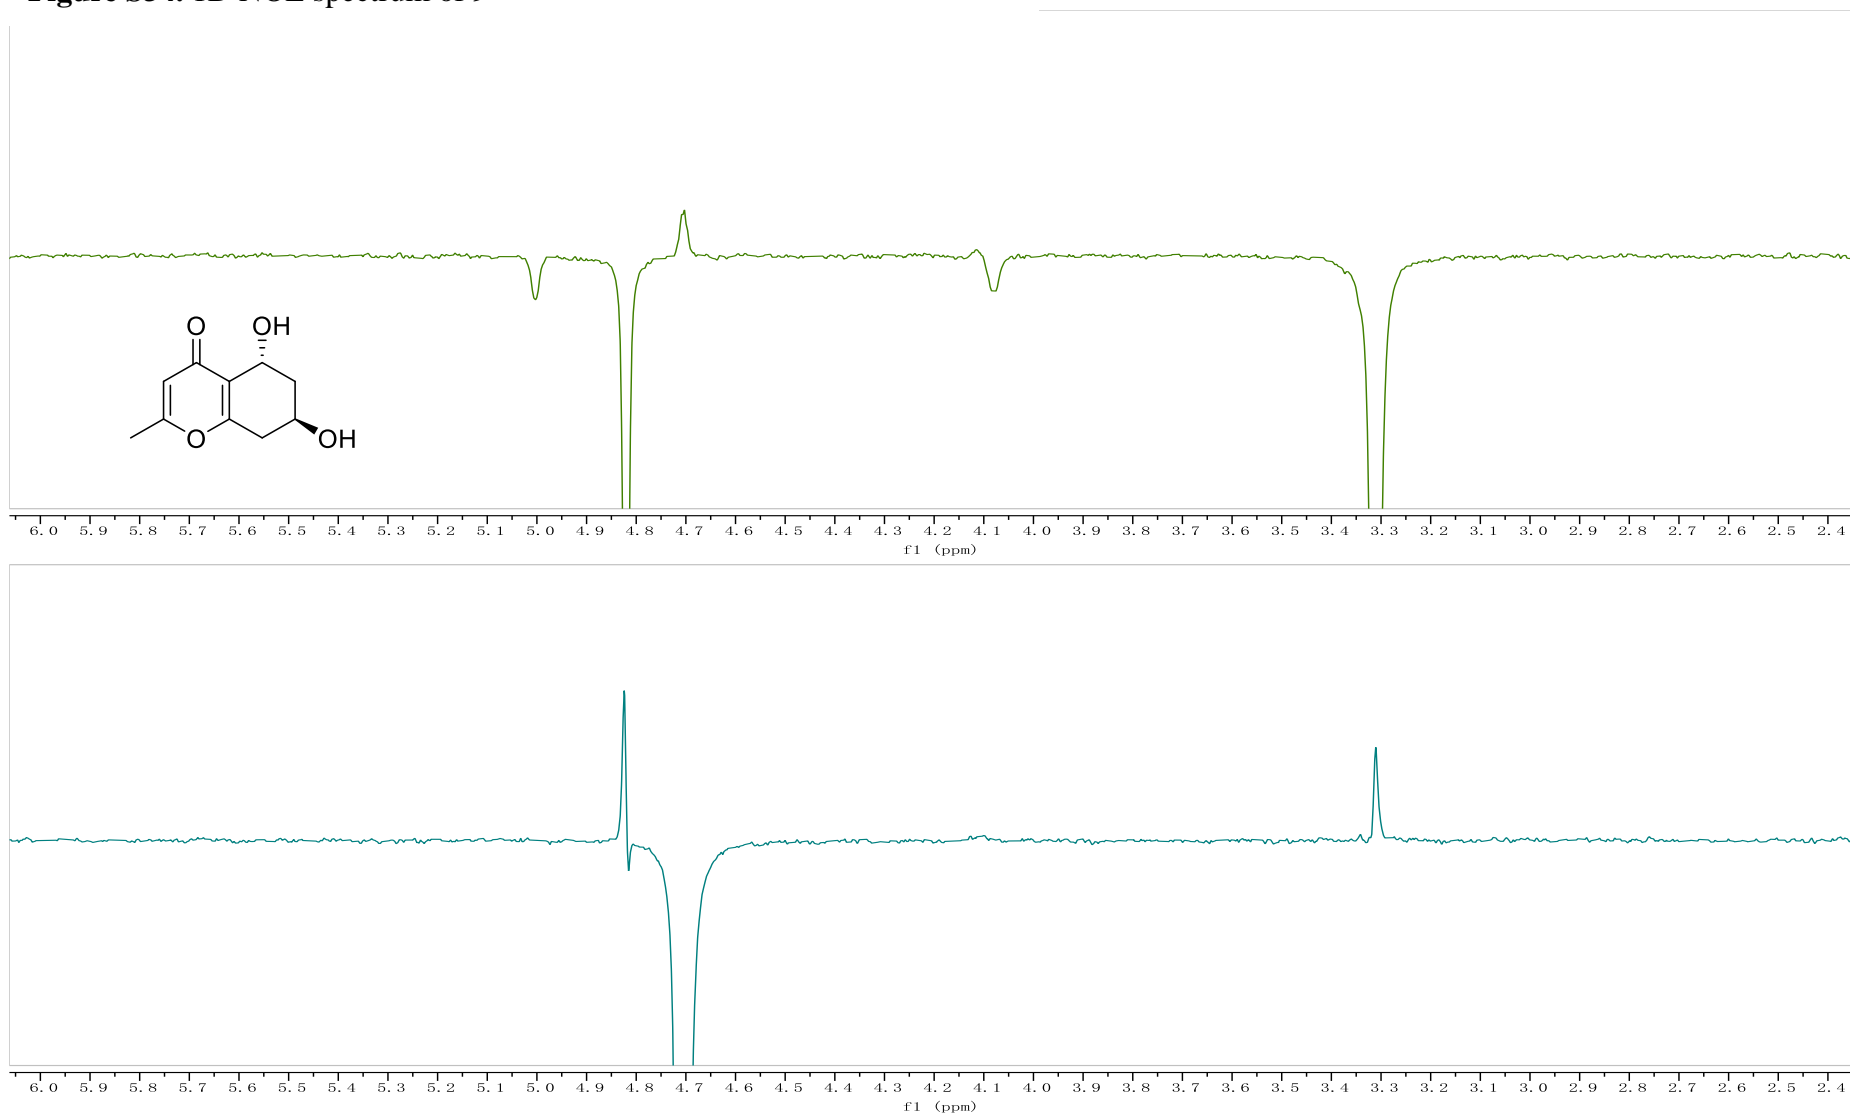

**Figure S35.** HRESIMS spectrum of **9**

/70-84-3 #51 R1: 0.40 AV: 1 NL: 7.63E7  
T: FTMS + c ESI Full ms [50.00-700.00]

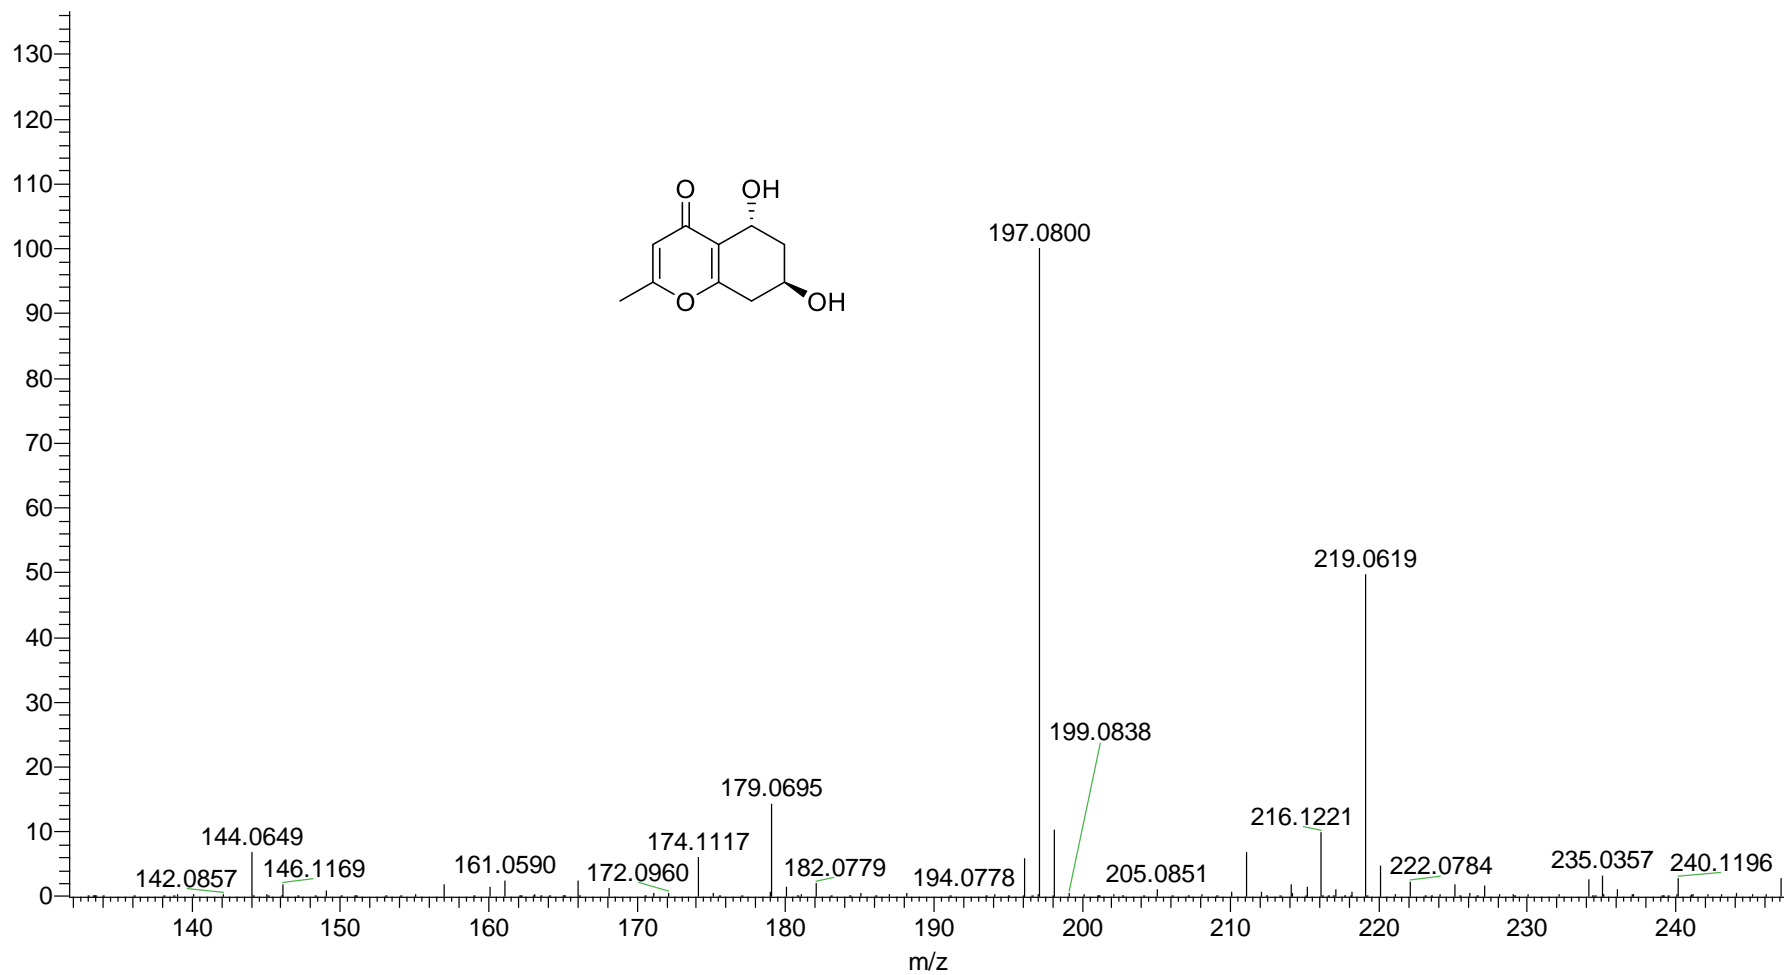

Figure S36. IR spectrum of 9

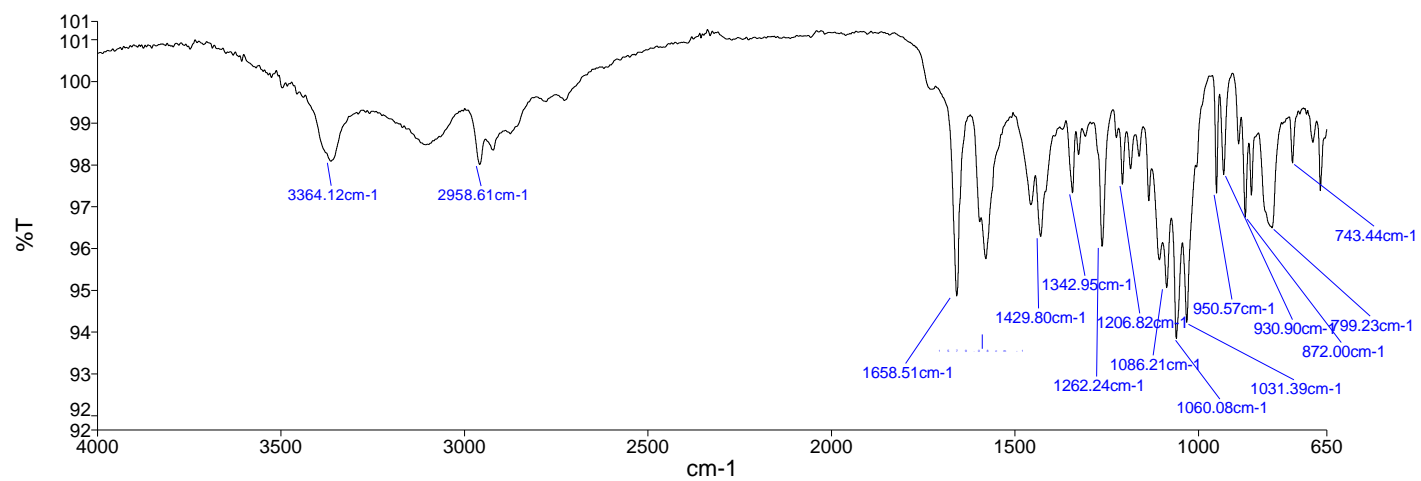

Figure S37. UV spectrum of 9

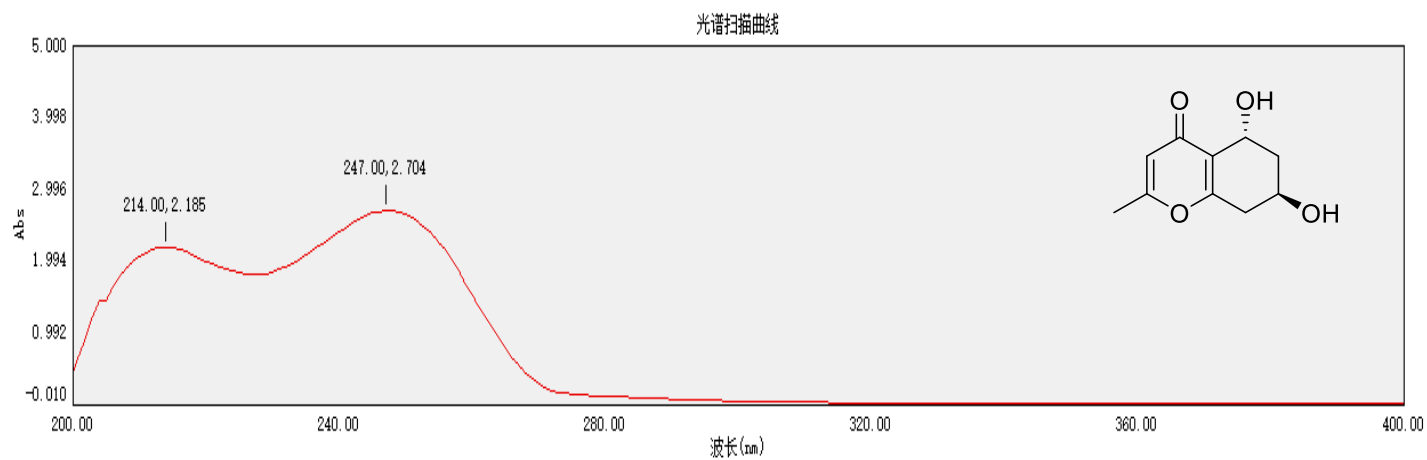

**Figure S38.** CD spectrum of **9**

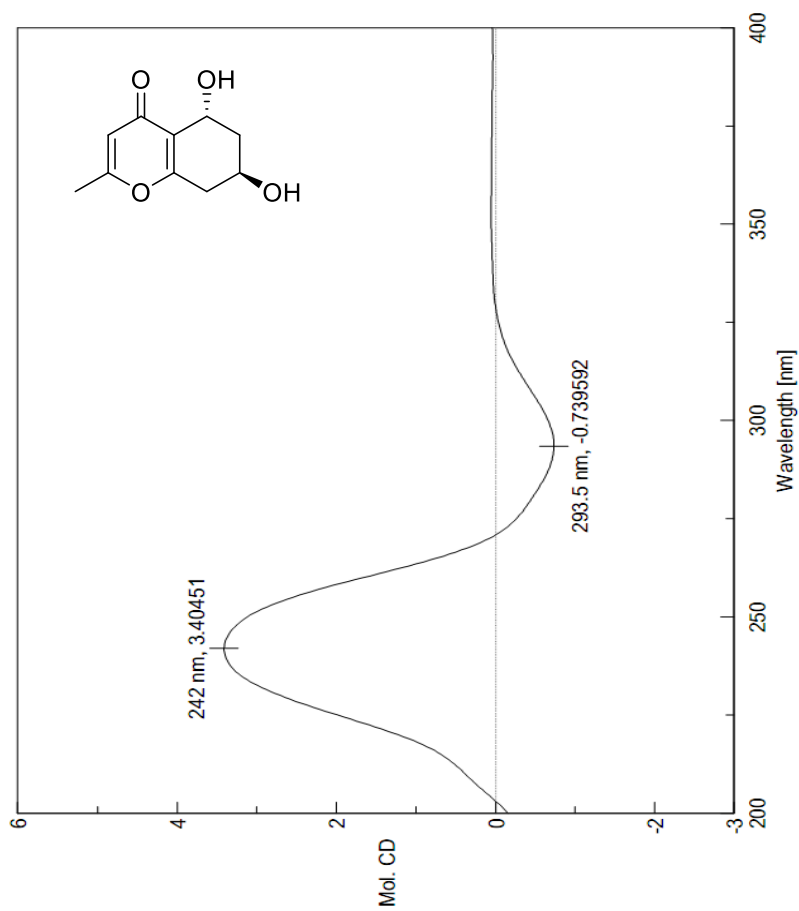

[Comments]  
 Sample name 770-84-3  
 Comment

[Measurement Information]  
 Division Name IMM-CD  
 Sample Name JMM5  
 Serial No. A024461168

Accessory Standard  
 Accessory S/N A005461185  
 Cell Length 1 mm

Measurement date 2021/1/29 15:51

Photometric Mode CD, HT, Abs  
 Measure Range 400 - 200 nm  
 Data pitch 0.5 nm  
 Sensitivity Standard  
 D.I.T. 1 sec  
 Bandwidth 1.00 nm  
 Start Mode Immediately  
 Scanning Speed 100 nm/min  
 Baseline Correction Baseline  
 Shutter Control Auto  
 CD Detector PMT  
 PMT Voltage Auto  
 Accumulations 2  
 Solvent MEOH  
 Concentration 0.4 (w/v)%

[Detailed Information] 2021/1/29 16:21  
 Creation date 2021/1/29 16:21

Data array type Linear data array \* 3  
 Horizontal axis Wavelength [nm]  
 Vertical axis(1) Mol. CD  
 Vertical axis(2) HT [V]  
 Vertical axis(3) Abs  
 Start 400 nm  
 End 200 nm  
 Data interval 0.5 nm  
 Data points 401

770-84-3-1-s-m.jws

Figure S39. <sup>1</sup>H NMR spectrum of **10**

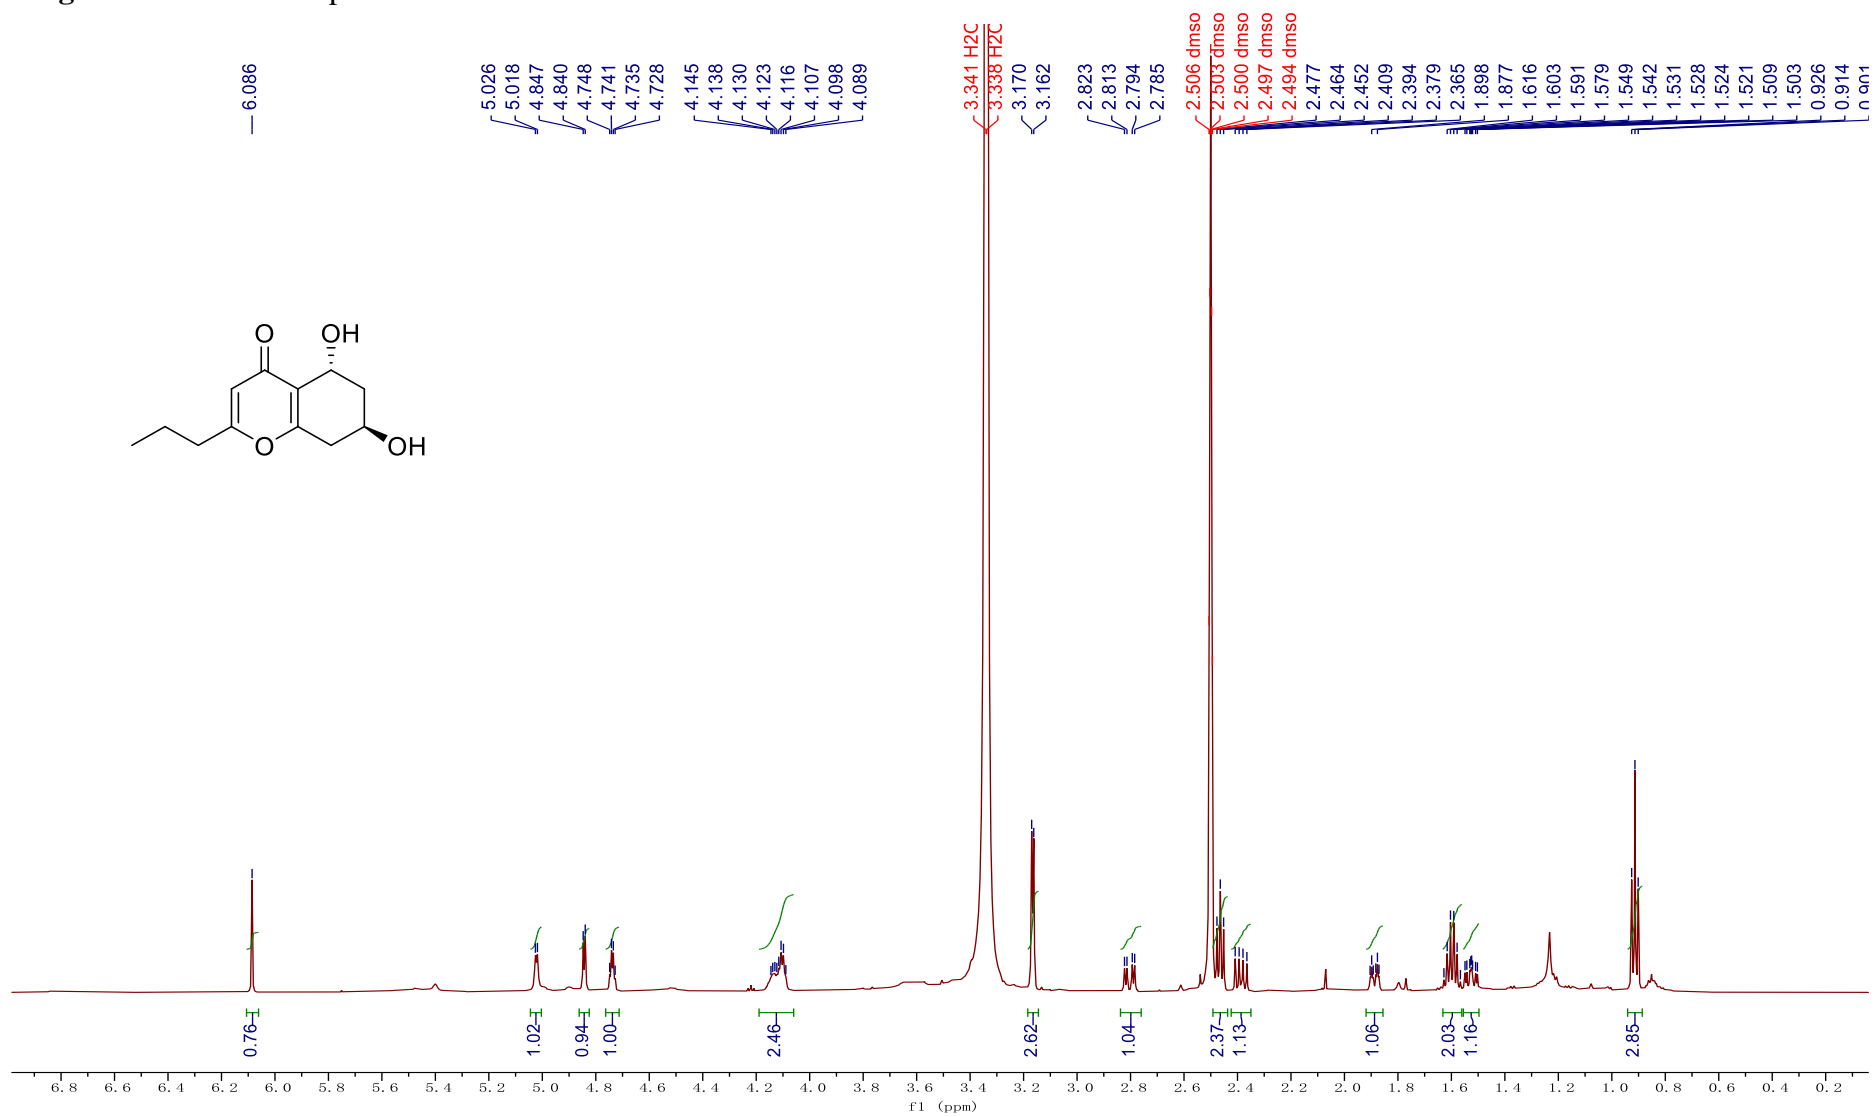

Figure S40.  $^{13}\text{C}$  NMR spectrum of **10**

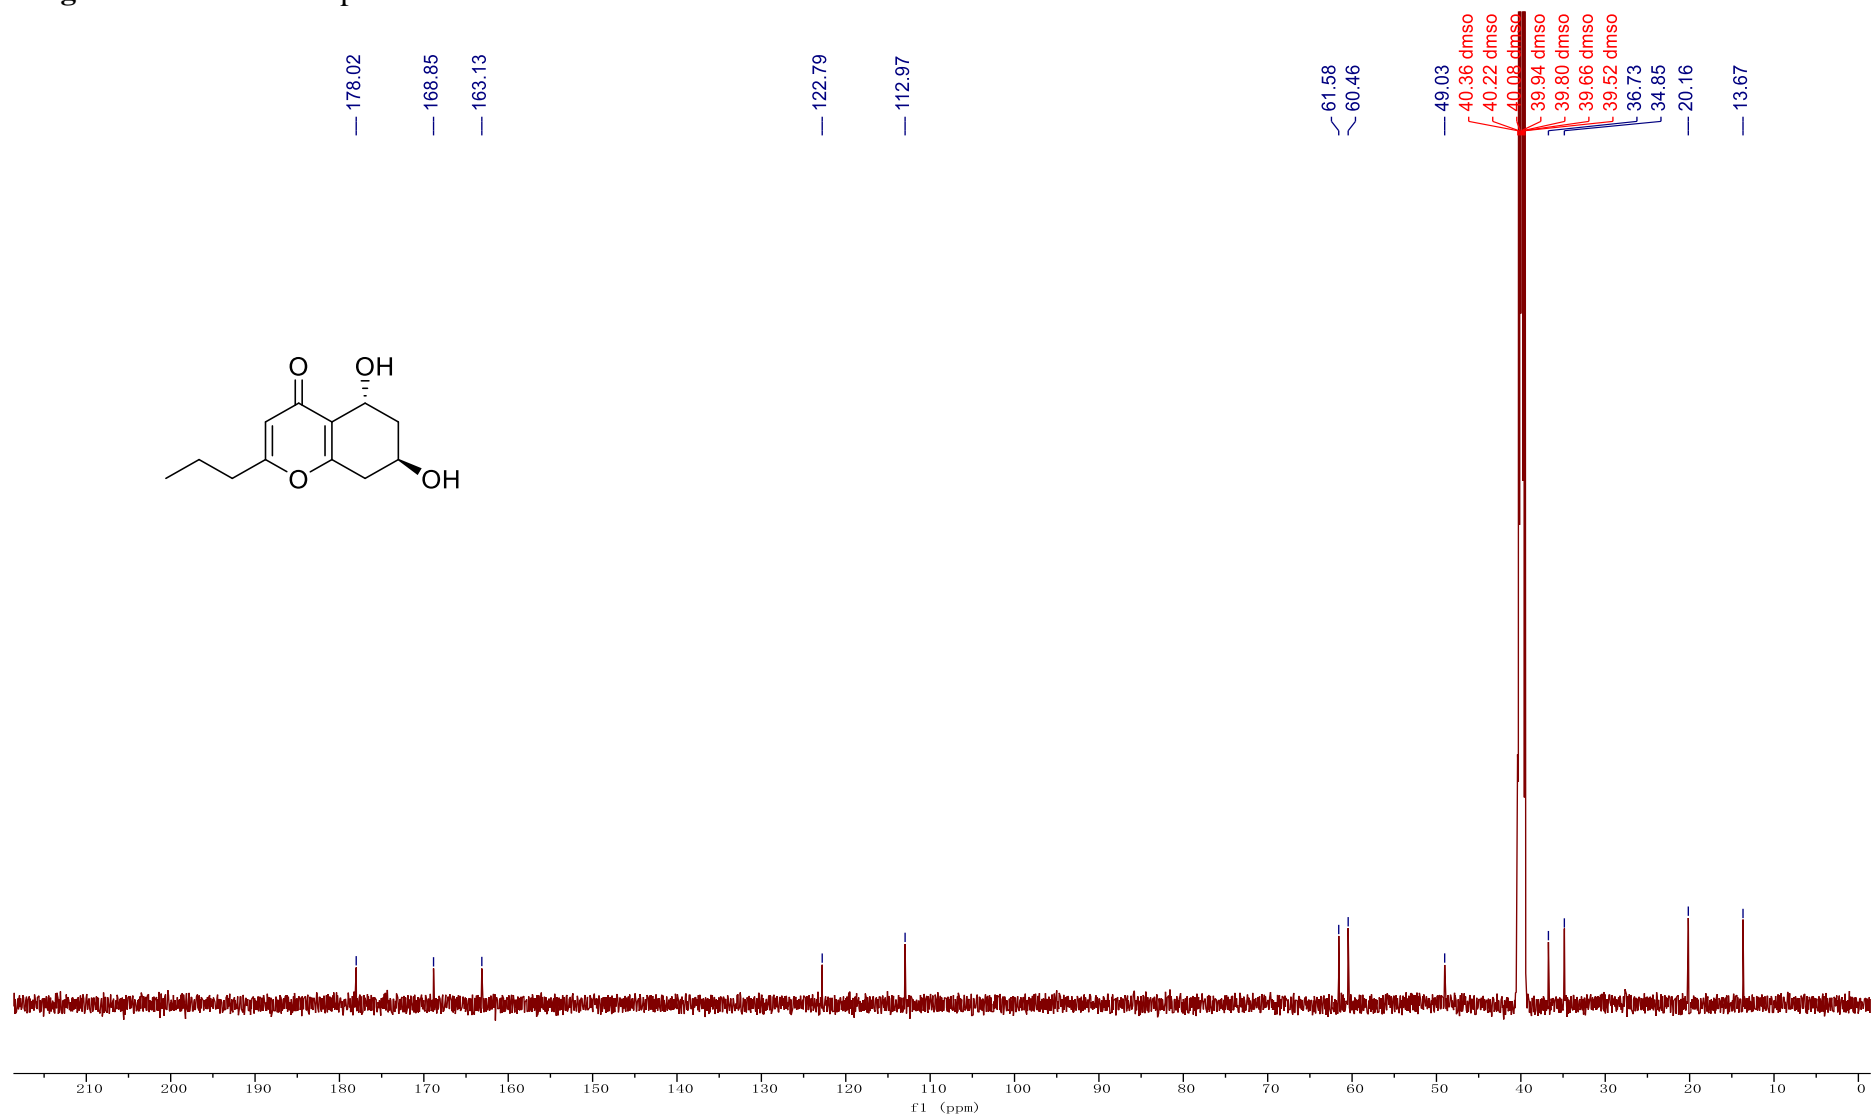



Figure S41. DEPT spectrum of **10**

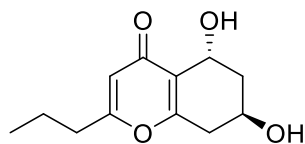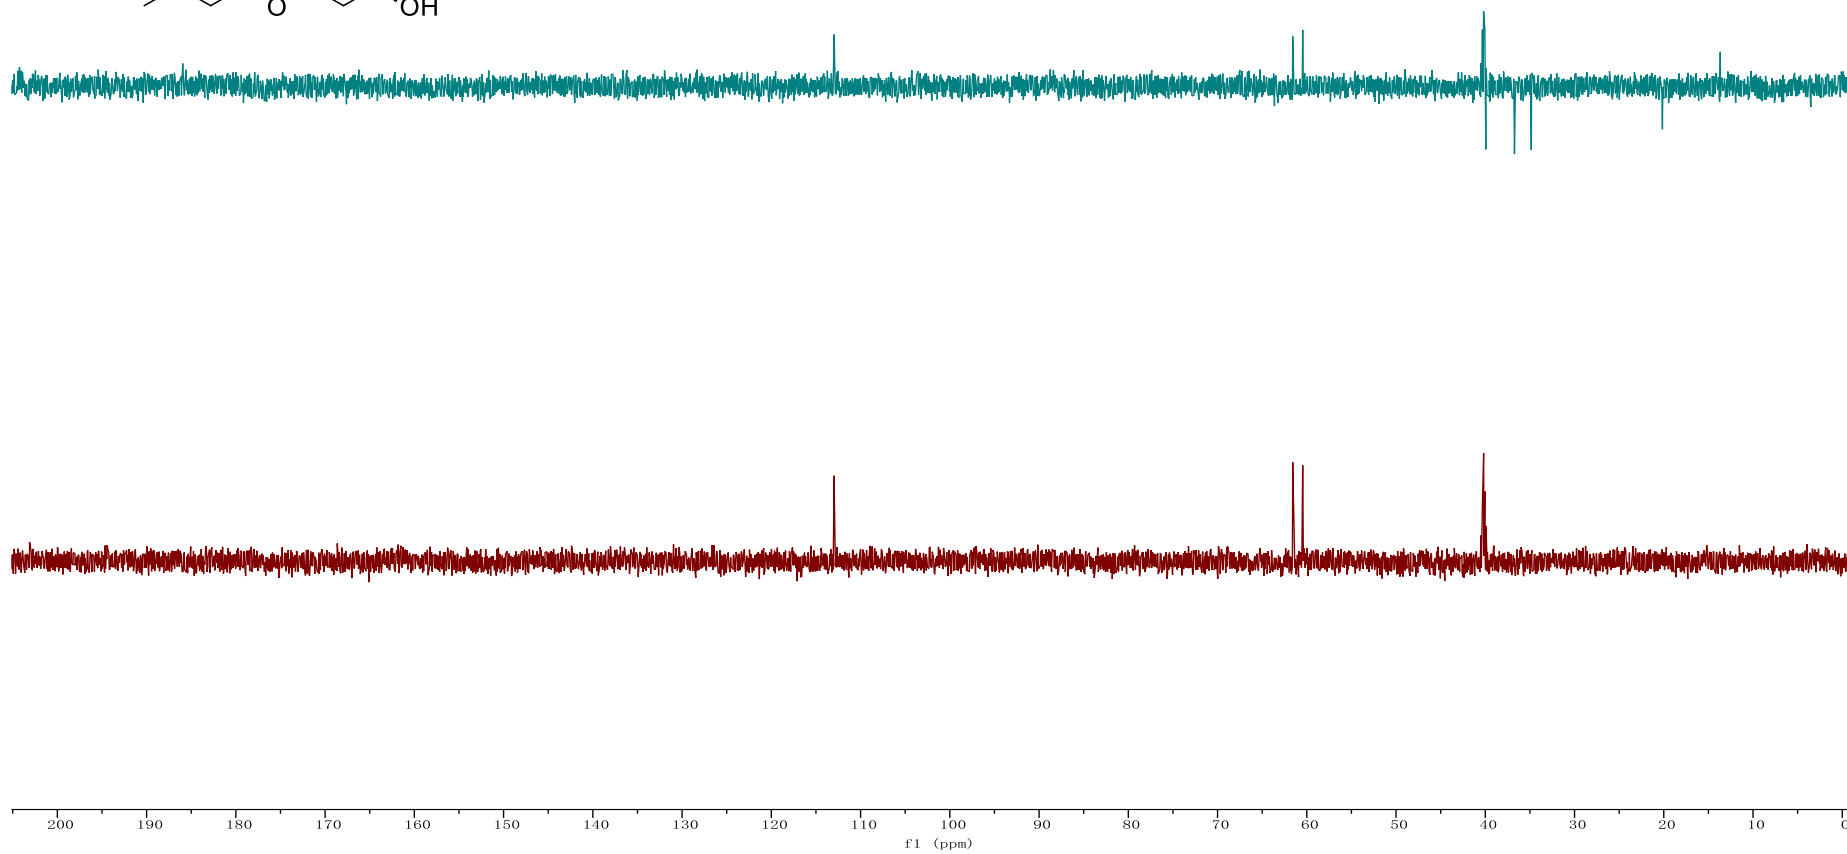

**Figure S42.**  $^1\text{H}$ - $^1\text{H}$  COSY spectrum of **10**

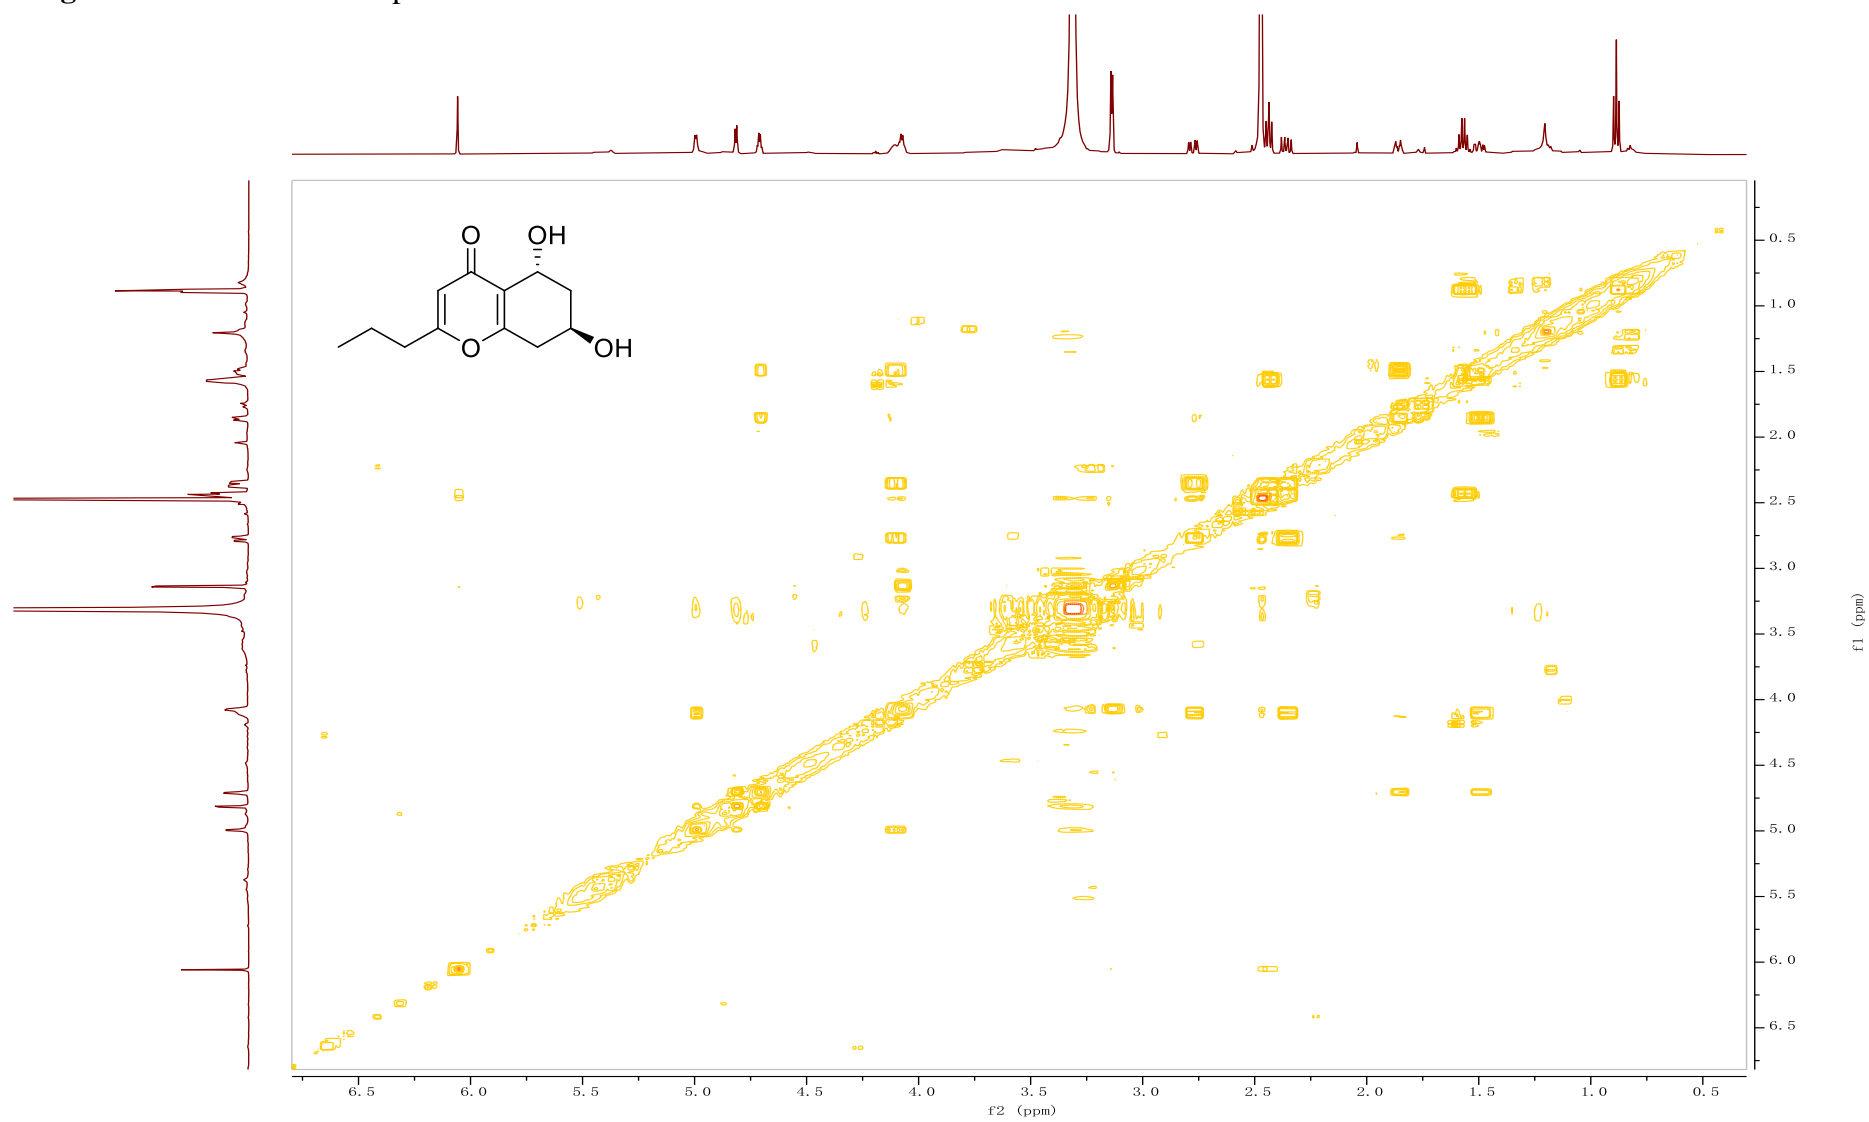

Figure S43. HSQC spectrum of **10**

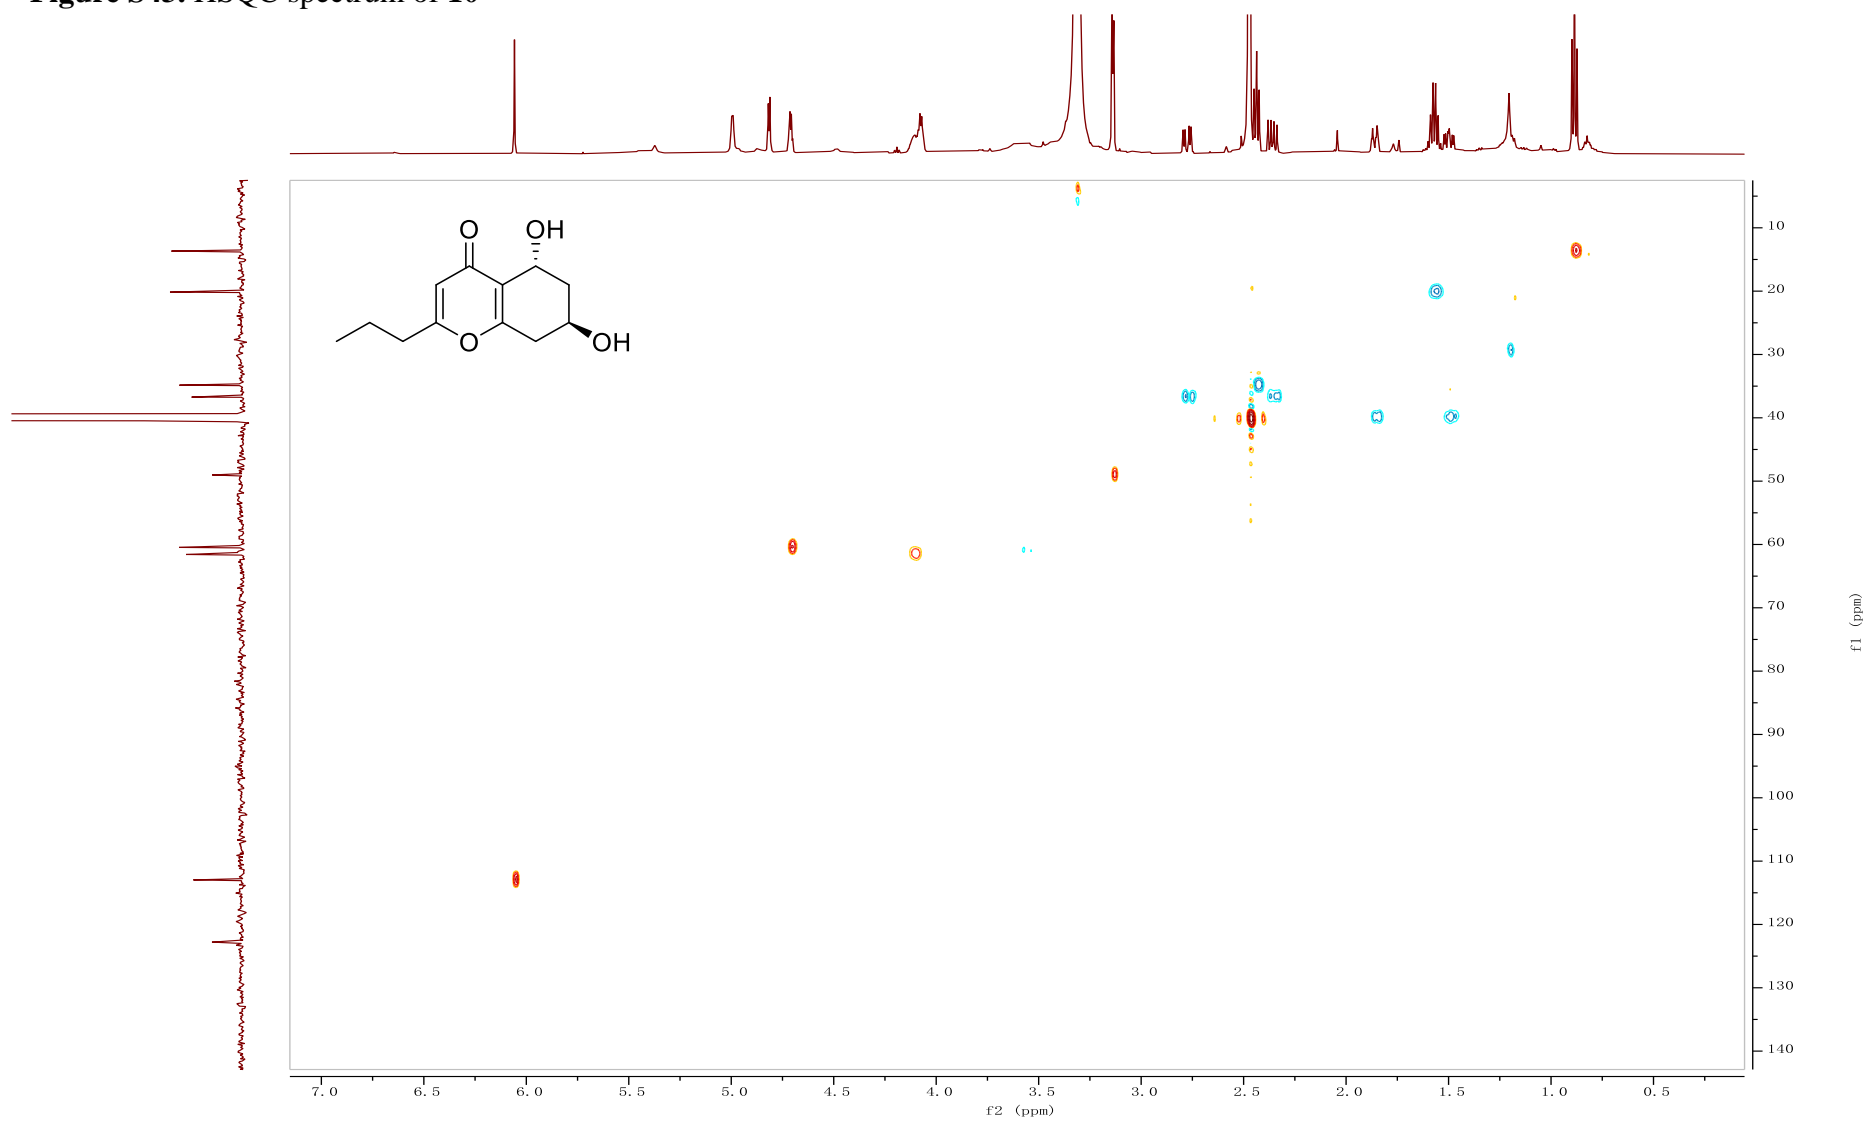

Figure S44. HMBC spectrum of **10**

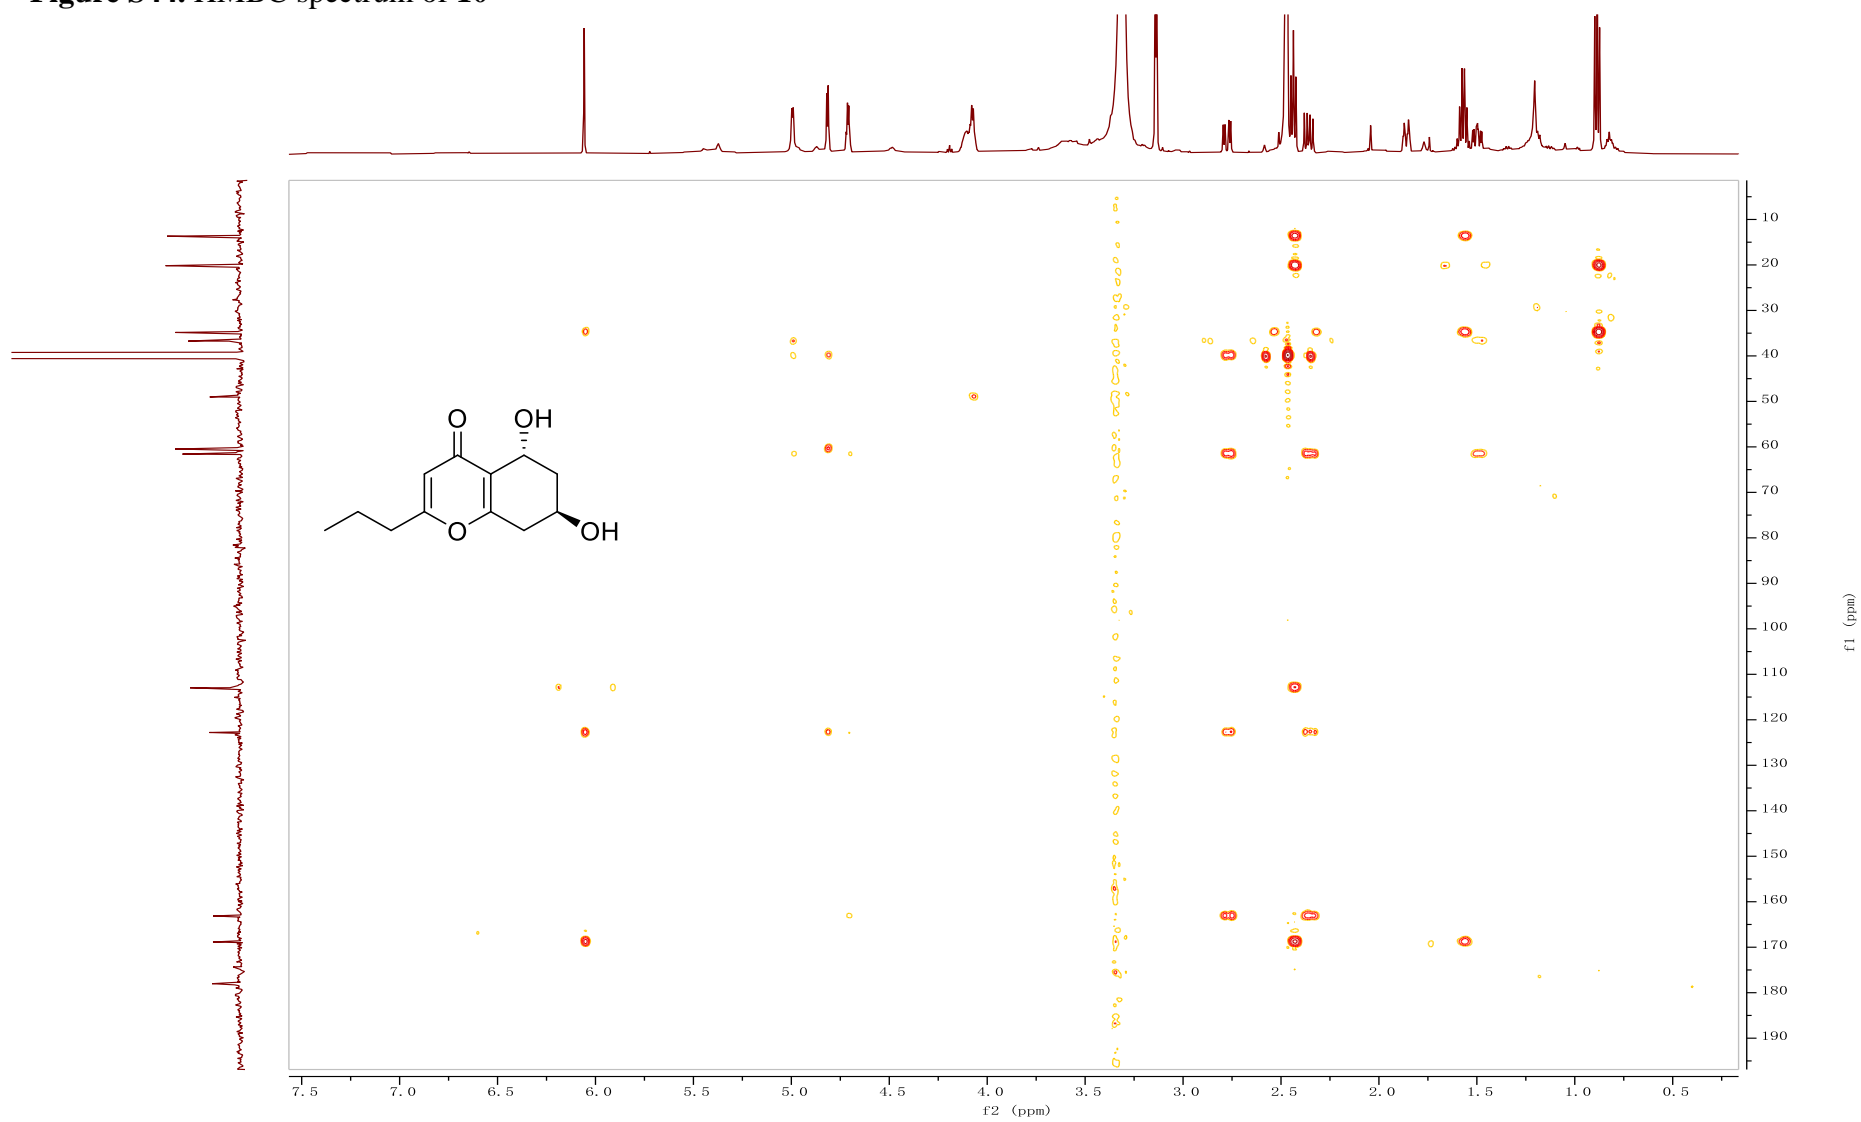

**Figure S45. 1D NOE spectrum of 10**

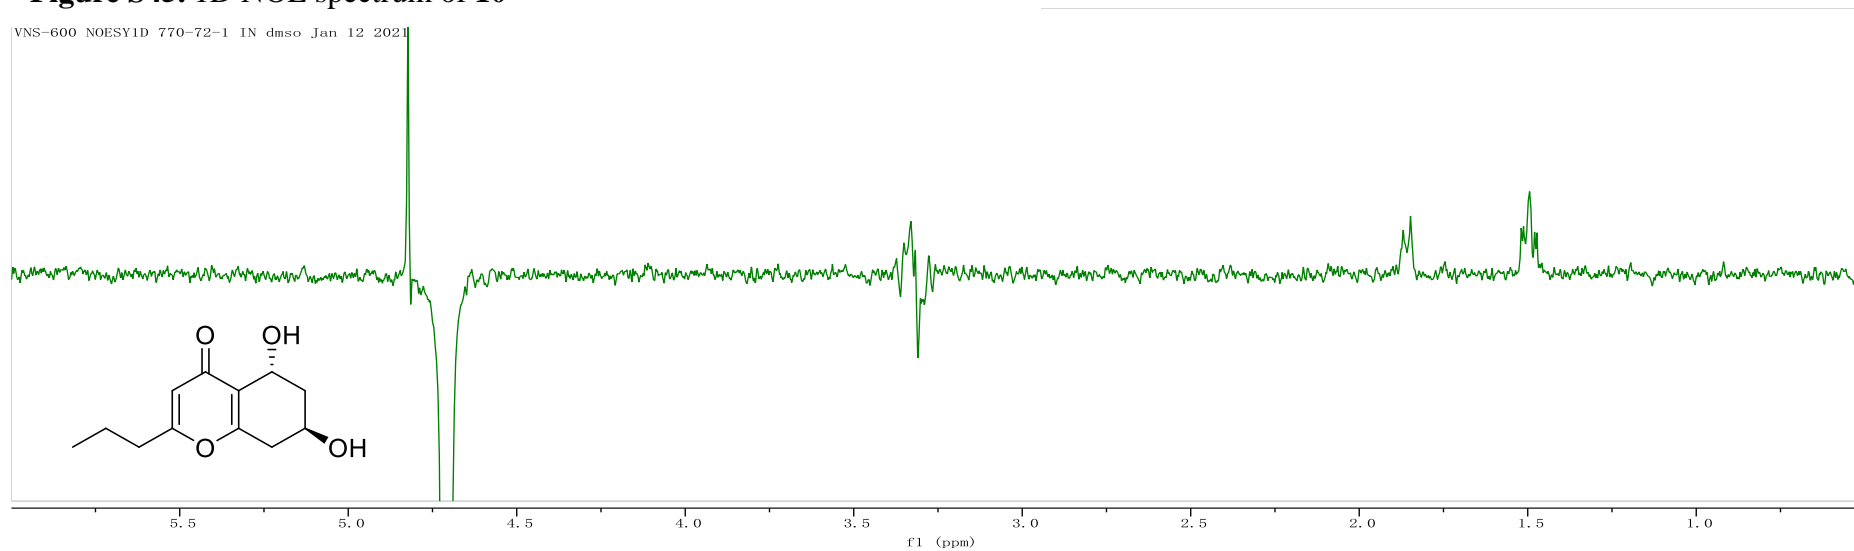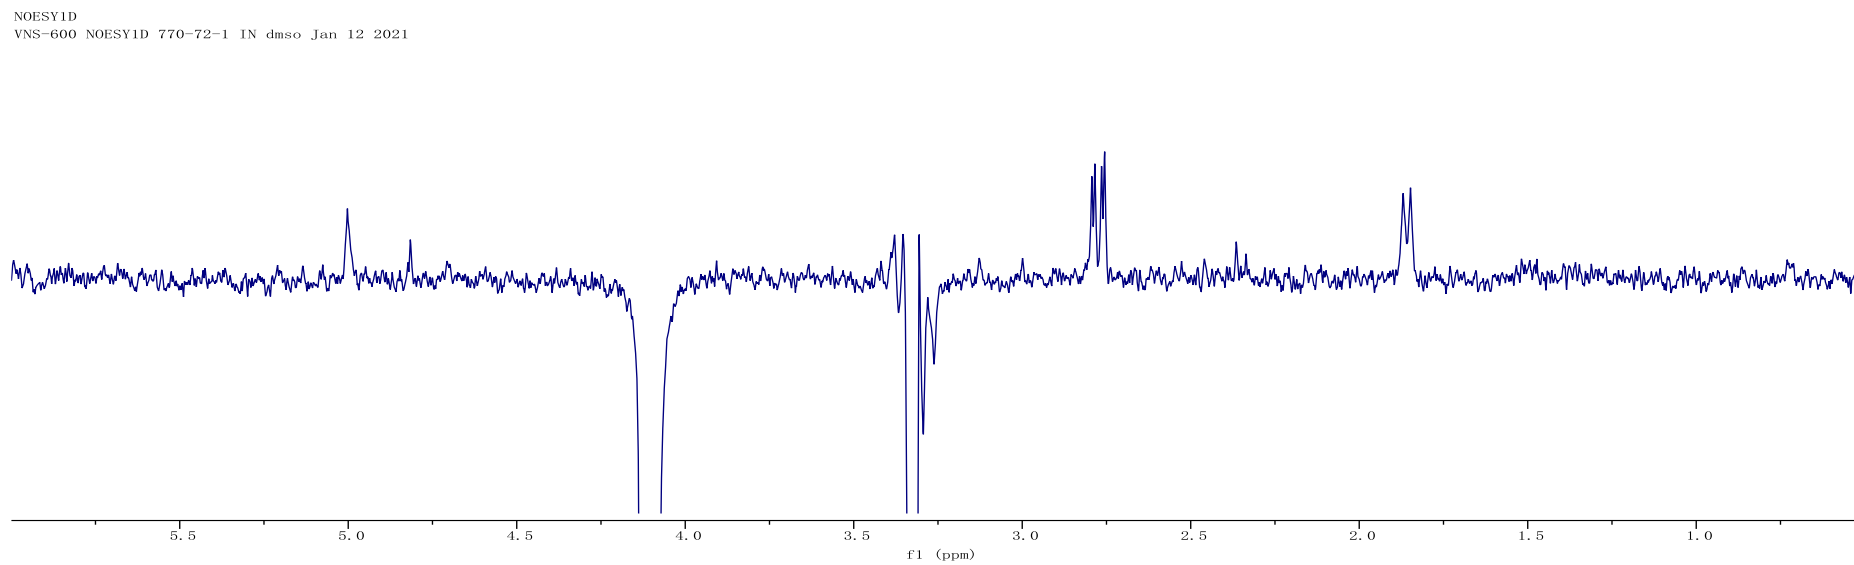

**Figure S46.** HRESIMS spectrum of **10**

110-12-1 #00 RT: 0.20 AV: 1 INL: 4.3/E/  
T: FTMS + c ESI Full ms [50.00-700.00]

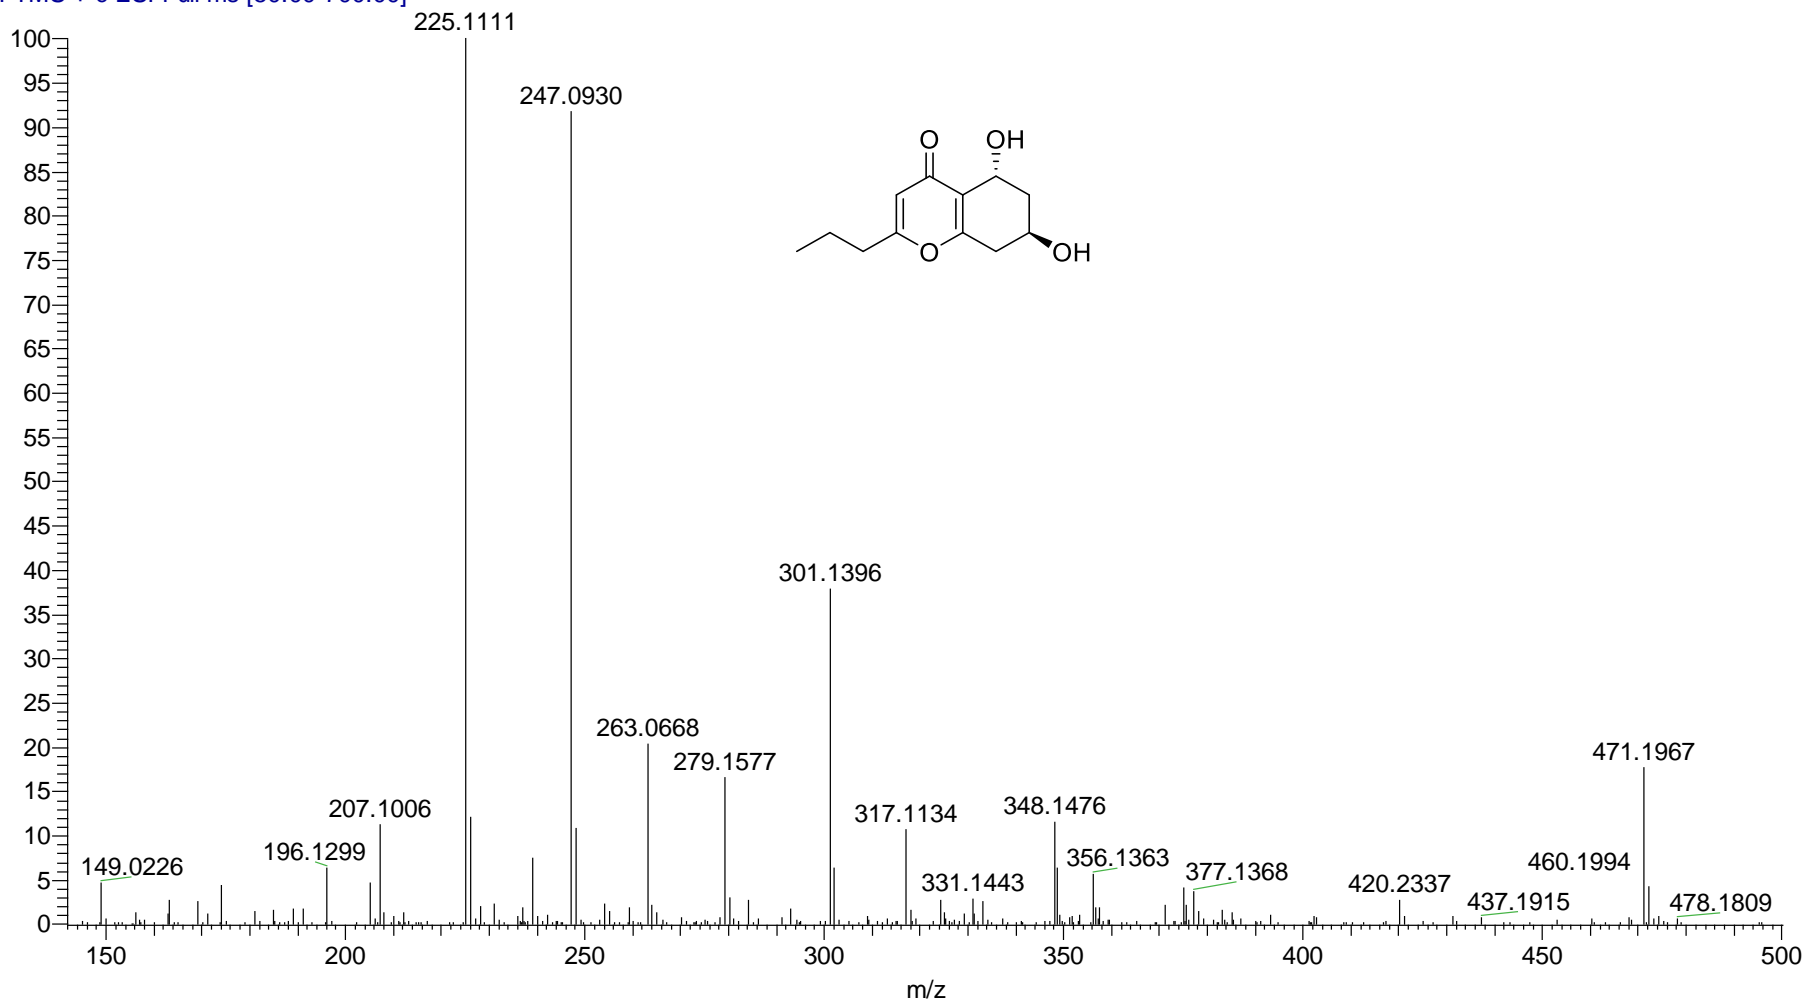

Figure S47. IR spectrum of 10

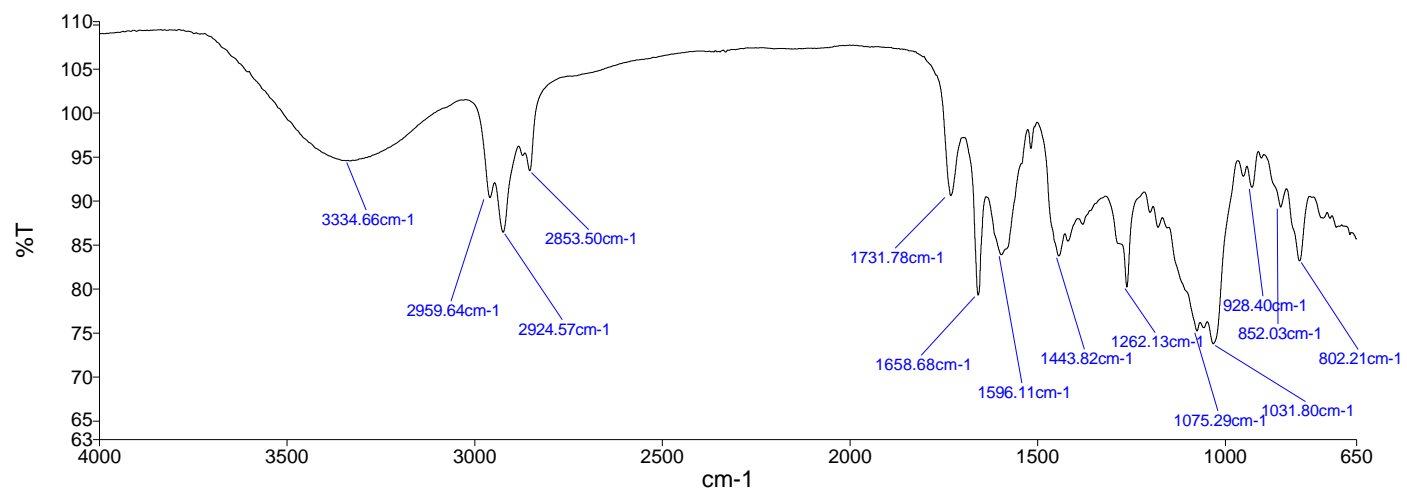

Figure S48. UV spectrum of 10

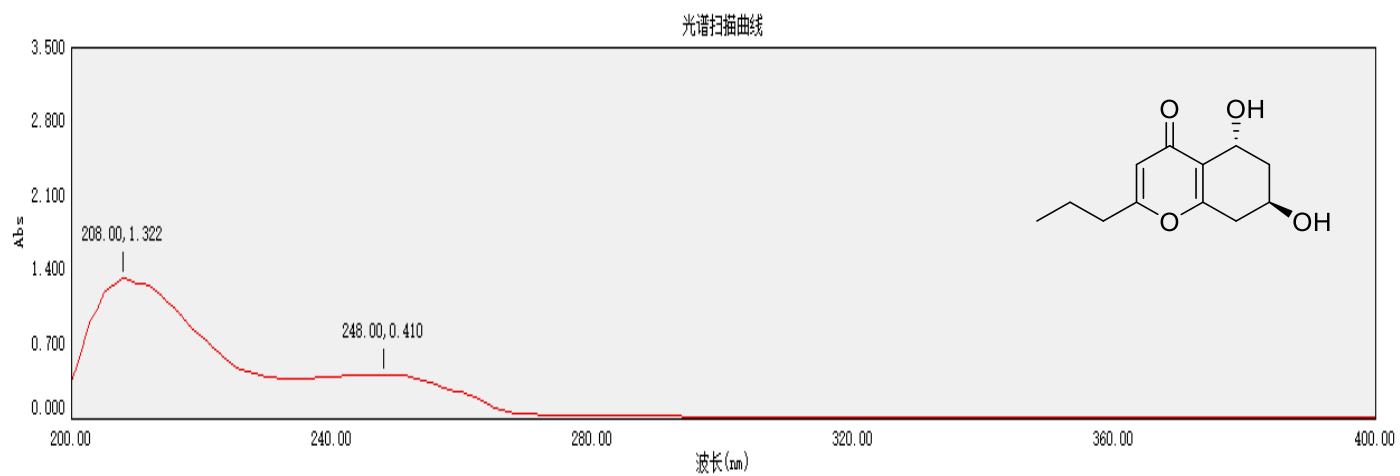

**Figure S49.** CD spectrum of **10**

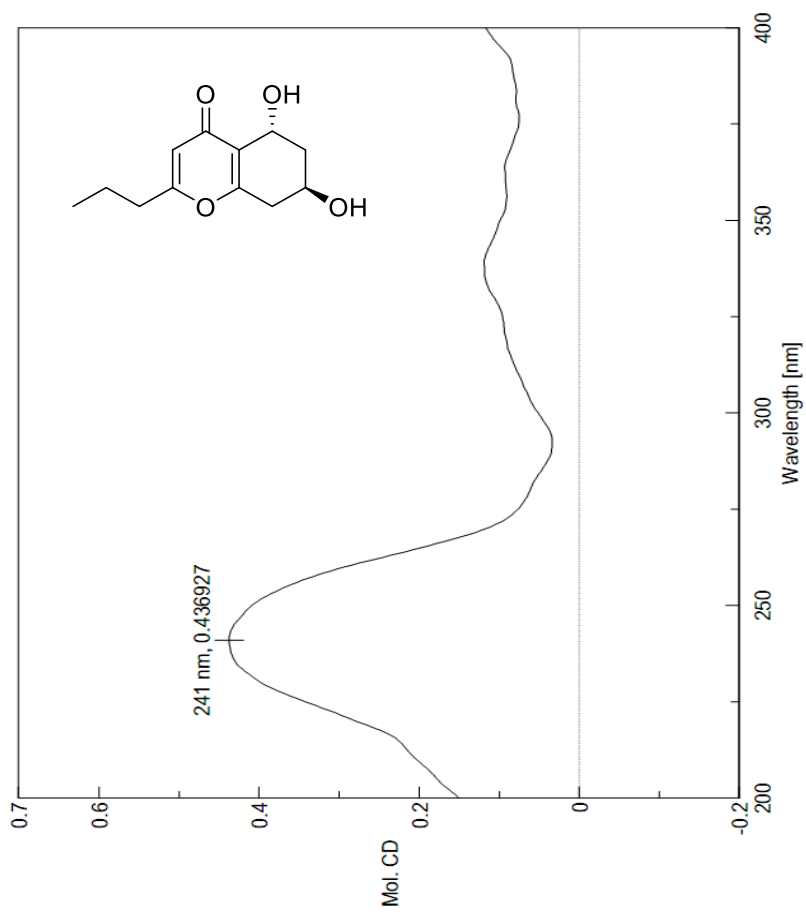

|                           |                       |  |                    |
|---------------------------|-----------------------|--|--------------------|
| [Comments]                |                       |  |                    |
| Sample name               | 770-72-1              |  |                    |
| Comment                   |                       |  | 770-72-1-1-s-m.jws |
| [Measurement Information] |                       |  |                    |
| Experiment Name           | IMM-CD                |  |                    |
| Compound Name             | IMM5                  |  |                    |
| Serial No.                | A024461168            |  |                    |
| Accessory                 | Standard              |  |                    |
| Accessory S/N             | A005461185            |  |                    |
| Cell Length               | 1 mm                  |  |                    |
| Measurement date          | 2021/11/29 15:43      |  |                    |
| Photometric Mode          | CD, HT, Abs           |  |                    |
| Measure Range             | 400 - 200 nm          |  |                    |
| Data pitch                | 0.5 nm                |  |                    |
| Sensitivity               | Standard              |  |                    |
| D.I.T.                    | 1 sec                 |  |                    |
| Bandwidth                 | 1.00 nm               |  |                    |
| Start Mode                | Immediately           |  |                    |
| Scanning Speed            | 100 nm/min            |  |                    |
| Baseline Correction       | Baseline              |  |                    |
| Shutter Control           | Auto                  |  |                    |
| CD Detector               | PMT                   |  |                    |
| PMT Voltage               | Auto                  |  |                    |
| Accumulations             | 2                     |  |                    |
| Solvent                   | MEOH                  |  |                    |
| Concentration             | 0.33 (w/v)%           |  |                    |
| [Detailed Information]    |                       |  |                    |
| Creation date             | 2021/11/29 16:01      |  |                    |
| Data array type           | Linear data array * 3 |  |                    |
| Horizontal axis           | Wavelength [nm]       |  |                    |
| Vertical axis(1)          | Mol. CD               |  |                    |
| Vertical axis(2)          | HT [V]                |  |                    |
| Vertical axis(3)          | Abs                   |  |                    |
| Start                     | 400 nm                |  |                    |
| End                       | 200 nm                |  |                    |
| Data interval             | 0.5 nm                |  |                    |
| Data points               | 401                   |  |                    |
